# Supplementary material for: Iridium/N-heterocyclic carbene-catalyzed C–H borylation of arenes by diisopropylaminoborane
Source: publisher site journal article supplement (doi:10.3762/bjoc.12.65), 2016-04-07

**Supporting Information**  
**for**  
**Iridium/N-heterocyclic carbene-catalyzed C–H borylation of**  
**arenes by diisopropylaminoborane**

Mamoru Tobisu\*<sup>1,2</sup>, Takuya Igarashi<sup>2</sup> and Naoto Chatani\*<sup>2</sup>

Address: <sup>1</sup>Center for Atomic and Molecular Technologies, Graduate School of Engineering,  
Osaka University, Osaka 565-0871, Japan and <sup>2</sup>Department of Applied Chemistry, Faculty of  
Engineering, Osaka University, Osaka 565-0871, Japan

Email: Mamoru Tobisu - [tobisu@chem.eng.osaka-u.ac.jp](mailto:tobisu@chem.eng.osaka-u.ac.jp); Naoto Chatani -  
[chatani@chem.eng.osaka-u.ac.jp](mailto:chatani@chem.eng.osaka-u.ac.jp)

\* Corresponding author

**Experimental procedures, data for optimization studies and copies of <sup>1</sup>H and  
<sup>13</sup>C NMR spectra**

**CONTENTS**

|            |                                        |            |
|------------|----------------------------------------|------------|
| <b>I</b>   | <b>General information</b>             | <b>S2</b>  |
| <b>II</b>  | <b>Materials</b>                       | <b>S2</b>  |
| <b>III</b> | <b>Synthesis of starting materials</b> | <b>S2</b>  |
| <b>IV</b>  | <b>Optimization studies</b>            | <b>S3</b>  |
| <b>V</b>   | <b>Typical procedure</b>               | <b>S9</b>  |
| <b>VI</b>  | <b>Spectroscopic data</b>              | <b>S11</b> |

## I. General information

$^1\text{H}$  NMR and  $^{13}\text{C}$  NMR spectra were recorded on a JEOL ECS-400 spectrometer in  $\text{CDCl}_3$  or  $\text{C}_6\text{D}_6$  with tetrachloroethane as the internal standard. Data are reported as follows: chemical shift in ppm ( $\delta$ ), multiplicity (s = singlet, d = doublet, t = triplet, and m = multiplet), coupling constant (Hz), and integration. Infrared spectra (IR) were obtained using a JASCO FT/IR-4200 spectrometer; absorptions are reported in reciprocal centimeters with the following relative intensities: s (strong), m (medium), or w (weak). Mass spectra and high resolution mass spectra (HRMS) were obtained on a JEOL JMS-700 spectrometer. Analytical gas chromatography (GC) was carried out on a Shimadzu GC-2014 gas chromatograph, equipped with a flame ionization detector. Melting points were determined using a Yamato melting point apparatus. Column chromatography was performed with  $\text{SiO}_2$  (silicycle SilicaFlash F60 (230–400 mesh)).

## II. Materials

$[\text{Ir}(\text{OMe})(\text{cod})]_2$  (TCI),  $\text{ICy}\cdot\text{HCl}$  (TCI) and  $\text{NaO}t\text{-Bu}$  (TCI) were used as received. Methylcyclohexane was purified by distillation prior to use. *N*-methylindole (TCI), benzo[*b*]thiophene (TCI), 5-chloro3-methylbenzo[*b*]thiophene (TCI), 2,3-benzofuran (TCI), thiophene (TCI), 2-methylthiophene (TCI), 2-methoxythiophene (TCI), 2-methylfuran (TCI) and *N*-methylpyrrole (TCI) were obtained from commercial suppliers and used as received. All arenes (TCI) and naphthalene (Aldrich) were used as received. The other *N*-methylindoles used in this study were synthesized by the reaction of the corresponding indole with MeI according to the literature procedure.<sup>1</sup>

## III. Synthesis of starting material

Diisopropylaminoborane (**1g**). [CAS: 22092-92-8]

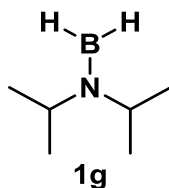

Diisopropylaminoborane was prepared as described in literatures.<sup>2</sup>

To a stirred solution of diisopropylamine (28.2 mL, 200 mmol, 1.0 equiv) in THF (70 mL),  $\text{H}_2\text{SO}_4$  (5.4 mL, 100 mmol, 0.5 equiv) were added at 0 °C. A white precipitate appeared immediately. After

<sup>1</sup> Greulich, T. W.; Daniliuc, C. G.; Studer, A. *Org. Lett.* **2015**, 17, 254.

<sup>2</sup> a) Marciasini, L.; Richy, N.; Vaultier, M.; Pucheault, M. *Chem. Commun.* **2012**, 448, 1553.

b) Marciasini, L.; Richy, N.; Vaultier, M.; Pucheault, M. *Adv. Synth. Catal.* **2013**, 6, 1083.

the mixture was stirred at 0 °C for 30 min, NaBH<sub>4</sub> (8.2 g, 220 mmol, 1.1 equiv) was carefully added. The mixture was allowed to warm to room temperature and stirred for 4 h. The crude mixture was concentrated under vacuum and the residue was taken with toluene (100 mL), washed with water (4 × 100 mL). The organic phase was dried using Na<sub>2</sub>SO<sub>4</sub> and concentrated under reduced pressure to give an amine-borane complex as a colorless oil. The resulting amine-borane complex was then refluxed at 195 °C for 9 h, and the diisopropylaminoborane was distilled under N<sub>2</sub> to give 17.2 g (76% yield).

## IV. Optimization studies

### IV-I. Optimization studies for heteroarenes

The effect of the ligand was initially examined using **2** (0.50 mmol), **1g** (1.0 mmol), [Ir(OMe)(cod)]<sub>2</sub> (0.050 mmol), ligand (0.10 mmol) and base (0.20 mmol) in methylcyclohexane (1.0 mL) at 140 °C, 15 h (Table S1). Under these conditions, ICy·HCl was found to be an optimal ligand with a borylated product **2-B** being formed in 33% (Entry 17).

Table S1. Effect of ligands.

| Entry | Ligand                                         | Base                | NMR yield [%] | 2-Isomer/3-Isomer | Recovered <b>2</b> [%] |
|-------|------------------------------------------------|---------------------|---------------|-------------------|------------------------|
| 1     | dtbpy                                          | none                | trace         | -                 | 85                     |
| 2     | dppe                                           | none                | 2             | 100/0             | 48                     |
| 3     | dppf                                           | none                | 11            | 91/9              | 65                     |
| 4     | Xantphos                                       | none                | 18            | 56/44             | 59                     |
| 5     | DPEPhos                                        | none                | 6             | 85/15             | 69                     |
| 6     | PPh <sub>3</sub>                               | none                | 21            | 57/43             | 66                     |
| 7     | PCy <sub>3</sub>                               | none                | 3             | >99/1             | 71                     |
| 8     | P(OPh) <sub>3</sub>                            | none                | 11            | 45/55             | 82                     |
| 9     | P(C <sub>6</sub> F <sub>5</sub> ) <sub>3</sub> | none                | 19            | 21/79             | 64                     |
| 10    | Cy-JohnPhos                                    | none                | 11            | 64/36             | 72                     |
| 11    | JohnPhos                                       | none                | 6             | 50/50             | 87                     |
| 12    | DavePhos                                       | none                | 15            | 67/33             | 71                     |
| 13    | XPhos                                          | none                | 21            | 71/29             | 61                     |
| 14    | SPhos                                          | none                | 15            | 67/33             | 69                     |
| 15    | IPr·HCl                                        | NaO <sup>t</sup> Bu | 3             | >99/1             | 72                     |
| 16    | IMes·HCl                                       | NaO <sup>t</sup> Bu | 5             | >99/1             | 65                     |
| 17    | ICy·HCl                                        | NaO <sup>t</sup> Bu | 33            | 88/12             | 53                     |
| 18    | I <sup>t</sup> Bu·HCl                          | NaO <sup>t</sup> Bu | 0             | -                 | 89                     |

The effect of the temperature was then examined using **2** (0.50 mmol), **1g** (1.0 mmol), [Ir(OMe)(cod)]<sub>2</sub> (0.050 mmol), ICy·HCl (0.10 mmol) and NaO<sup>t</sup>-Bu (0.20 mmol) in methylcyclohexane (1.0 mL) for 15 h (Table S2). Under these conditions, 110 °C was found to be an

optimal temperature with a borylated product **2-B** being formed in 58% (Entry 5).

Table S2. Effect of temperature.

| Entry | T [°C] | NMR yield [%] | 2-Isomer/3-Isomer | Recovered <b>2</b> [%] |
|-------|--------|---------------|-------------------|------------------------|
| 1     | 60     | 9             | >99/1             | 90                     |
| 2     | 80     | 21            | >99/1             | 44                     |
| 3     | 90     | 49            | 96/4              | 35                     |
| 4     | 100    | 47            | 94/6              | 31                     |
| 5     | 110    | 58            | 95/5              | 44                     |
| 6     | 120    | 43            | 88/12             | 54                     |
| 7     | 130    | 35            | 91/9              | 71                     |
| 8     | 140    | 33            | 88/12             | 82                     |

The effect of the amount of **1g** was then examined using **2** (0.50 mmol), **1g**, [Ir(OMe)(cod)]<sub>2</sub> (0.050 mmol), ICy·HCl (0.10 mmol) and NaOt-Bu (0.20 mmol) in methylcyclohexane (1.0 mL) at 110 °C, 15 h (Table S3). Under these conditions, **2** was found to be an optimal amount of **1g** with a borylated product **2-B** being formed in 58% (Entry 4).

Table S3. Effect of the amount of **1g**.

| Entry | x [equiv] | NMR yield [%] | 2-Isomer/3-Isomer | Recovered <b>2</b> [%] |
|-------|-----------|---------------|-------------------|------------------------|
| 1     | 1.0       | 22            | 91/9              | 54                     |
| 2     | 1.25      | 41            | 93/7              | 34                     |
| 3     | 1.5       | 41            | 93/7              | 33                     |
| 4     | 2.0       | 58            | 95/5              | 44                     |
| 5     | 2.5       | 46            | 96/4              | 42                     |
| 6     | 3.0       | 46            | 96/4              | 36                     |
| 7     | 3.5       | 41            | 98/2              | 30                     |
| 8     | 4.0       | 59            | 93/7              | 49                     |

The effect of the amount of ICy·HCl was then examined using **2** (0.50 mmol), **1g** (1.0 mmol), [Ir(OMe)(cod)]<sub>2</sub> (0.050 mmol), ICy·HCl and NaOt-Bu in methylcyclohexane (1.0 mL) at 110 °C, 15 h (Table S4). Under these conditions, 20 mol % was found to be an optimal amount of ICy·HCl with a borylated product **2-B** being formed in 58% (Entry 3).

Table S4. Effect of the amount of ICy•HCl.

| Entry | x [mol%] | NMR yield [%] | 2-Isomer/3-Isomer | Recovered <b>2</b> [%] |
|-------|----------|---------------|-------------------|------------------------|
| 1     | 10       | 24            | 83/17             | 59                     |
| 2     | 15       | 31            | 94/6              | 54                     |
| 3     | 20       | 58            | 95/5              | 44                     |
| 4     | 25       | 61            | 95/5              | 33                     |
| 5     | 30       | 56            | 93/7              | 46                     |
| 6     | 35       | 61            | 92/8              | 42                     |
| 7     | 40       | 57            | 91/9              | 51                     |

The effect of the amount of  $[\text{Ir}(\text{OMe})(\text{cod})]_2$  was then examined using **2** (0.50 mmol), **1g** (1.0 mmol),  $[\text{Ir}(\text{OMe})(\text{cod})]_2$  (x mmol), ICy•HCl and NaOt-Bu in methylcyclohexane (1.0 mL) at 110 °C for 15 h (Table S5). Under these conditions, 10 mol % was found to be an optimal amount of  $[\text{Ir}(\text{OMe})(\text{cod})]_2$  with a borylated product **2-B** being formed in 58% (Entry 4).

Table S5. Effect of the amount of  $[\text{Ir}(\text{OMe})(\text{cod})]_2$ .

| Entry | x [mol%] | NMR yield [%] | 2-Isomer/3-Isomer | Recovered <b>2</b> [%] |
|-------|----------|---------------|-------------------|------------------------|
| 1     | 3        | 42            | 90/10             | 71                     |
| 2     | 5        | 41            | 98/2              | 65                     |
| 3     | 7.5      | 45            | 96/4              | 47                     |
| 4     | 10       | 58            | 95/5              | 44                     |

The effect of the amount of  $[\text{Ir}(\text{OMe})(\text{cod})]_2$  was also examined using **10** (0.50 mmol), **1g** (1.0 mmol),  $[\text{Ir}(\text{OMe})(\text{cod})]_2$ , ICy•HCl and NaOt-Bu in methylcyclohexane (1.0 mL) at 110 °C for 4 h (Table S6). Under these conditions, we were able to reduce the catalyst loading to 10 mol % without any loss of the yield of the product (Entry 4). This result indicate that benzo[*b*]thiophene is more reactive than *N*-methylindole toward this borylation.

Table S6. Effect of the amount of  $[\text{Ir}(\text{OMe})(\text{cod})]_2$ .

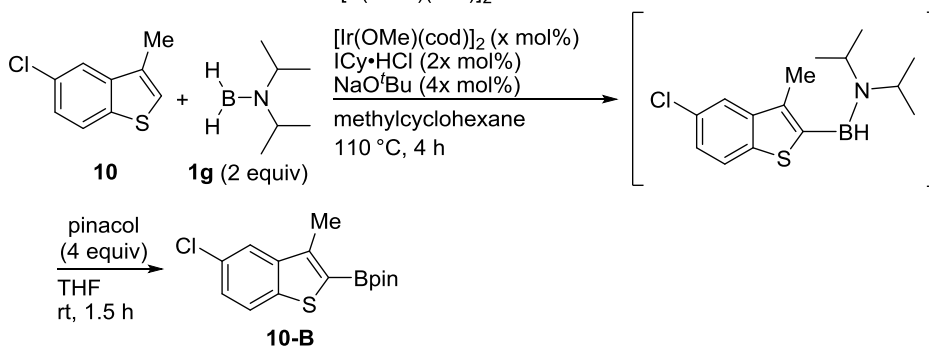

| Entry | x [mol%] | NMR yield [%] | Recovered <b>10</b> [%] |
|-------|----------|---------------|-------------------------|
| 1     | 1.25     | 76            | 30                      |
| 2     | 2.5      | 66            | 34                      |
| 3     | 5.0      | >99           | 0                       |
| 4     | 10       | >99           | 0                       |

The effect of the solvent was then examined using **2** (0.50 mmol), **1g** (1.0 mmol),  $[\text{Ir}(\text{OMe})(\text{cod})]_2$  (0.050 mmol),  $\text{ICy}\cdot\text{HCl}$  (0.10 mmol) and  $\text{NaOt-Bu}$  (0.20 mmol) in solvent (1.0 mL) at 110 °C, 15 h (Table S7). Under these conditions, methylcyclohexane was found to be an optimal solvent with a borylated product **2-B** being formed in 58% (Entry 1).

Table S7. Effect of solvents.

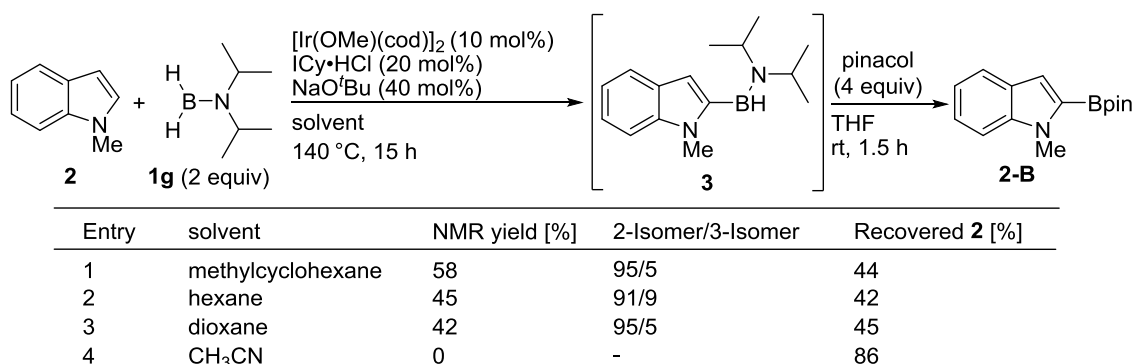

| Entry | solvent                | NMR yield [%] | 2-Isomer/3-Isomer | Recovered <b>2</b> [%] |
|-------|------------------------|---------------|-------------------|------------------------|
| 1     | methylcyclohexane      | 58            | 95/5              | 44                     |
| 2     | hexane                 | 45            | 91/9              | 42                     |
| 3     | dioxane                | 42            | 95/5              | 45                     |
| 4     | $\text{CH}_3\text{CN}$ | 0             | -                 | 86                     |

The effect of  $\text{H}_2$  scavengers was then examined using **2** (0.50 mmol), **1g** (1.0 mmol),  $[\text{Ir}(\text{OMe})(\text{cod})]_2$  (0.050 mmol),  $\text{ICy}\cdot\text{HCl}$  (0.10 mmol),  $\text{NaOt-Bu}$  (0.20 mmol) and  $\text{H}_2$  scavenger (0.50 mmol) in methylcyclohexane (1.0 mL) at 110 °C, 15 h (Table S8). However, addition of a hydrogen scavenger did not improve the yield of **2-B** under these conditions (Entry 9).

Table S8. Effect of H<sub>2</sub> scavengers.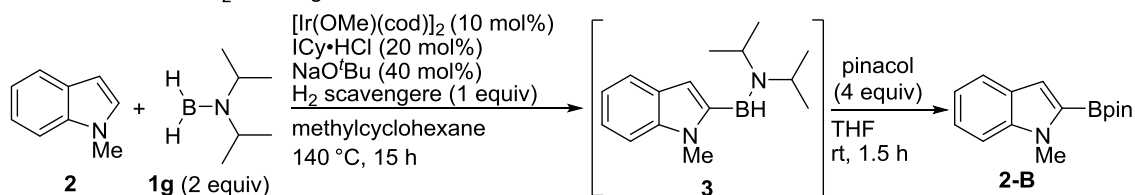

| Entry          | H <sub>2</sub> scavenger | NMR yield [%] | 2-Isomer/3-Isomer | Recovered <b>2</b> [%] |
|----------------|--------------------------|---------------|-------------------|------------------------|
| 1              | cyclopentene             | 26            | 88/12             | 54                     |
| 2              | cyclohexene              | 19            | 84/16             | 34                     |
| 3              | 1-methyl-1cyclohexene    | 43            | 91/9              | 33                     |
| 4              | cyclooctene              | 33            | 85/15             | 44                     |
| 5              | 3,3-dimethyl-1-butene    | 66            | 89/11             | 42                     |
| 6              | 3,3-dimethyl-1-butene    | 10            | >99/1             | 36                     |
| 7 <sup>a</sup> | 2,3,3-trimethyl-1-butene | 21            | 90/10             | 30                     |
| 8 <sup>b</sup> | none                     | 0             | -                 | >99                    |
| 9              | none                     | 58            | 95/5              | 44                     |

a : H<sub>2</sub> scavenger was 2 equiv.

b : The reaction was conducted two neck flask in refluxing solvent.

The effect of the reaction time was then examined using **2** (0.50 mmol), **1g** (1.0 mmol), [Ir(OMe)(cod)]<sub>2</sub> (0.050 mmol), ICy·HCl (0.10 mmol) and NaOt-Bu (0.20 mmol) in methylcyclohexane (1.0 mL) at 110 °C (Table S9). Under these conditions, 4 h were found to be an optimal reaction time with a borylated product **2-B** being formed in 72% (Entry 3).

Table S9. Effect of reaction time.

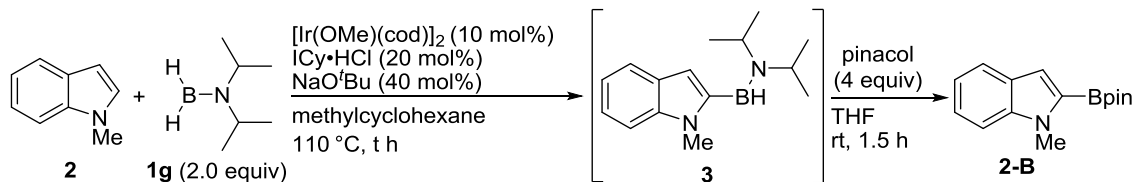

| Entry | t [h] | NMR yield [%] | 2-Isomer/3-Isomer | Recovered <b>2</b> [%] |
|-------|-------|---------------|-------------------|------------------------|
| 1     | 1     | 37            | >99/1             | 68                     |
| 2     | 3     | 57            | 98/2              | 49                     |
| 3     | 4     | 72            | 99/1              | 40                     |
| 4     | 5     | 68            | 96/4              | 47                     |
| 5     | 6     | 69            | 94/6              | 42                     |
| 6     | 9     | 60            | 98/2              | 37                     |
| 7     | 12    | 57            | 98/2              | 39                     |
| 8     | 15    | 58            | 95/5              | 44                     |
| 9     | 24    | 50            | 92/8              | 58                     |
| 10    | 48    | 42            | 90/10             | 52                     |

#### IV-II. Optimization studies for arenes

The effect of the ligand was initially examined using **2** (0.50 mmol), [Ir(OMe)(cod)]<sub>2</sub> (0.050 mmol), ligand (0.10 mmol) and NaOt-Bu (0.20 mmol) in benzene (1.0 mL) at 110 °C, 18 h (Table S10). Under these conditions, ICy·HCl was found to be an optimal ligand with a borylated product **17-B** being formed in 53% (Entry 1).

Table S10. Effect of ligands.

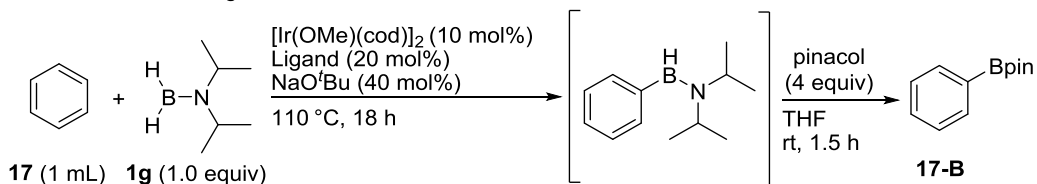

| Entry | Ligand      | GC yield [%] |
|-------|-------------|--------------|
| 1     | ICy•HCl     | 53           |
| 2     | IPrHCl      | 2            |
| 3     | IMes•HCl    | 0            |
| 4     | BICy•HCl    | 0            |
| 5     | I(1-Ad)•HCl | 1            |

The effect of the temperature was then examined using **2** (0.50 mmol), [Ir(OMe)(cod)]<sub>2</sub> (0.050 mmol), ICy•HCl (0.10 mmol) and NaO*t*-Bu (0.20 mmol) in benzene (1.0 mL) for 15 h (Table S11). Under these conditions, 110 °C was found to be an optimal temperature with a borylated product **17-B** being formed in 47% (Entry 4).

Table S11. Effect of temperature.

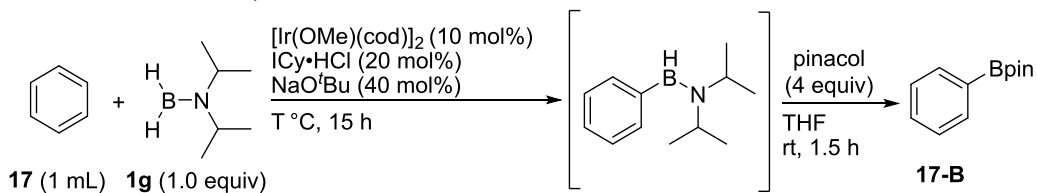

| Entry | T [°C] | GC yield [%] |
|-------|--------|--------------|
| 1     | 60     | 5            |
| 2     | 80     | 30           |
| 3     | 100    | 26           |
| 4     | 110    | 47           |
| 5     | 115    | 31           |
| 6     | 120    | 13           |

The effect of the reaction time was then examined using **2** (0.50 mmol), [Ir(OMe)(cod)]<sub>2</sub> (0.050 mmol), ICy•HCl (0.10 mmol) and NaO*t*-Bu (0.20 mmol) in benzene (1.0 mL) at 110 °C (Table S12). Under these conditions, 18 h was found to be an optimal reaction time with a borylated product **17-B** being formed in 53% (Entry 7).



Table S12. Effect of reaction time.

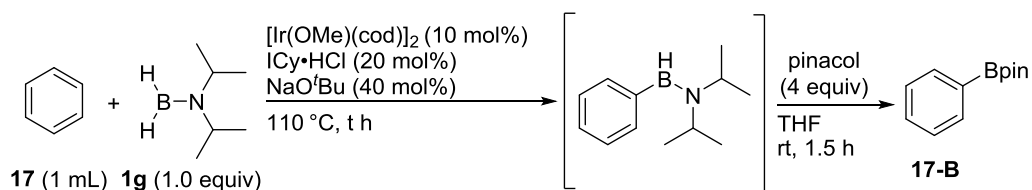

| Entry | t [h] | GC yield [%] |
|-------|-------|--------------|
| 1     | 2     | 19           |
| 2     | 4     | 28           |
| 3     | 6     | 40           |
| 4     | 8     | 37           |
| 5     | 12    | 42           |
| 6     | 15    | 47           |
| 7     | 18    | 53           |
| 8     | 24    | 40           |
| 9     | 48    | 32           |

The effect of the amount of ICy·HCl was initially examined using **2** (0.50 mmol), [Ir(OMe)(cod)]<sub>2</sub> (0.050 mmol), ICy·HCl and NaO*t*-Bu in benzene (1.0 mL) at 110 °C for 18 h (Table S13). Under these conditions, 20 mol % was found to be an optimal amount of ICy·HCl with a borylated product **17-B** being formed in 53% (Entry 1).

Table S13. Effect of the amount of ICy·HCl.

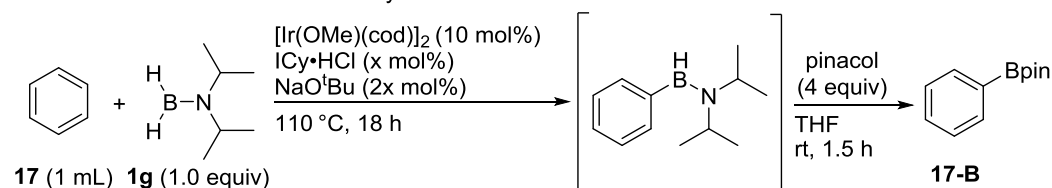

| Entry | x [mol%] | GC yield [%] |
|-------|----------|--------------|
| 1     | 20       | 53           |
| 2     | 25       | 27           |
| 3     | 30       | 31           |
| 4     | 40       | 19           |

#### IV. Typical procedure

##### Method A: Procedure for the Ir-catalyzed borylation of heteroarenes using **1g**.

In a glovebox filled with nitrogen, [Ir(OMe)(cod)]<sub>2</sub> (33.1 mg, 0.050 mmol, 0.10 equiv), ICy·HCl (26.2 mg, 0.10 mmol, 0.20 equiv), NaO*t*-Bu (19.2 mg, 0.20 mmol, 0.40 equiv) and methylcyclohexane (1.0 mL) were added to a 10 mL-sample vial with a Teflon-sealed screwcap, and stirred for 5 min at room temperature. A heteroarene (0.50 mmol, 1.0 equiv) and **1g** (113.1 mg, 2.0 equiv) were added, and then the cap was screwed on seal the vial. The vial was stirred at 110 °C for 4 h. The reaction mixture was cooled to room temperature. Pinacol (236 mg, 2.0 mmol) in THF (2.0

mL) was added and the reaction mixture was stirred under N<sub>2</sub> at room temperature for 1.5 h. The crude mixture was filtered through a pad of Celite and eluted with EtOAc. The filtrate was concentrated in vacuo and sampled for analysis by <sup>1</sup>H NMR spectroscopy using 1,2-dichloroethane as an internal standard. The residue was purified by flash column chromatography over silica gel eluting with hexane/EtOAc. Product-containing fractions were concentrated *in vacuo* to give a pure borylated product.

#### Method B: Procedure for the Ir-catalyzed borylation of arenes using **1g**.

In a glovebox, [Ir(OMe)(cod)]<sub>2</sub> (33.1 mg, 0.050 mmol, 0.10 equiv), ICy•HCl (26.2 mg, 0.10 mmol, 0.20 equiv), NaO*t*-Bu (19.2 mg, 0.20 mmol, 0.40 equiv) and benzene (1.0 mL) were added to a 10 mL-sample vial with a Teflon-sealed screwcap, and stirred for 5 min at room temperature. **1g** (113.1 mg, 1.0 mmol, 2.0 equiv) was added, and then the cap was screwed on to seal the vial. The vial was stirred at 110 °C for 18 h. The reaction mixture was cooled to room temperature. Pinacol (236 mg, 2.0 mmol, 4.0 equiv) in THF (2.0 mL) was added and the reaction mixture was stirred for 1.5 h at room temperature under N<sub>2</sub>. The crude mixture was filtered through a pad of Celite and eluted with EtOAc. The filtrate was concentrated in vacuo and sampled for analysis by <sup>1</sup>H NMR spectroscopy using 1,2-dichloroethane as an internal standard. The residue was purified by flash column chromatography over silica gel eluting with hexane/EtOAc. Product-containing fractions were concentrated in vacuo to give a pure borylated product.

#### A procedure for the gram scale synthesis of 2-borylated **10**.

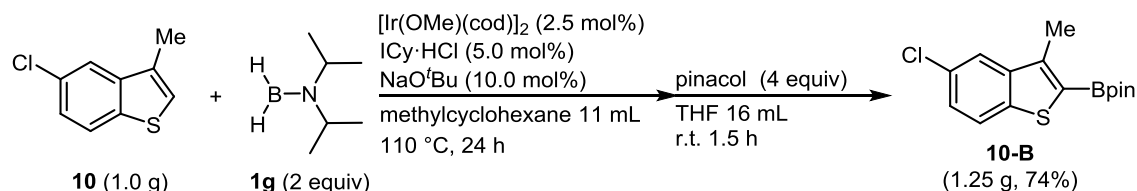

In a glovebox, [Ir(OMe)(cod)]<sub>2</sub> (91.0 mg, 0.138 mmol, 0.025 equiv), ICy•HCl (73.8 mg, 0.275 mmol, 0.050 equiv), NaO*t*-Bu (52.8 mg, 0.55 mmol, 0.10 equiv) and methylcyclohexane (11.0 mL) were added to a 190 mL-sample vial with a Teflon-sealed screwcap, and stirred for 5 min at room temperature. Compounds **10** (1.00 g, 5.50 mmol, 1.0 equiv) and **1g** (1.24g, 11.0 mmol, 2.0 equiv) were added, and then the cap was screwed on to seal the vial. The vial was stirred at 110 °C for 24 h. The reaction mixture was cooled to room temperature. Pinacol (2.57 g, 22.0 mmol, 4.0 equiv) in THF (16 mL) was added and the reaction mixture was stirred under N<sub>2</sub> at room temperature for 1.5 h. The crude mixture was filtered through a pad of Celite and eluted with EtOAc. The filtrate was concentrated in vacuo and sampled for analysis <sup>1</sup>H NMR spectroscopy using 1,2-dichloroethane as an internal standard. The residue was purified by flash column chromatography over silica gel eluting with hexane/EtOAc (40/1) solution. Product-containing fractions were concentrated in vacuo to give **10-B** as a white solid (1.25 g, 74%).

## V. Spectroscopic Data

### 1-Methyl-2-(4,4,5,5-tetramethyl-1,3,2-dioxaborolan-2-yl)-1H-indole (2-B). [CAS: 596819-10-2]

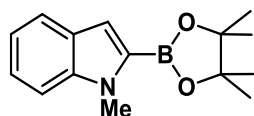

Method A was used.  $R_f$  0.14 (Hexane/EtOAc = 20/1). White solid (83 mg, 65%).

$^1\text{H}$  NMR ( $\text{C}_6\text{D}_6$ , 399.78 MHz):  $\delta$  1.12 (s, 12H), 3.69 (s, 3H), 7.13 (d,  $J = 7.8$  Hz, 2H), 7.27 (td,  $J = 0.9, 7.8$  Hz, 1H), 7.57 (s, 1H), 7.68-7.70 (m, 1H).

$^1\text{H}$  NMR ( $\text{CDCl}_3$ , 399.78 MHz):  $\delta$  1.37 (s, 12H), 3.98 (s, 3H), 7.07-7.10 (m, 1H), 7.14 (s, 1H), 7.24-7.28 (m, 1H), 7.35 (d,  $J = 8.2$  Hz, 1H), 7.64 (d,  $J = 8.2$  Hz, 1H).

$^{13}\text{C}$  NMR ( $\text{C}_6\text{D}_6$ , 100.53 MHz):  $\delta$  24.9, 32.1, 83.6, 110.1, 115.6, 119.9, 122.2, 123.6, 128.8, 140.9.

HRMS (EI): Calcd for  $\text{C}_{15}\text{H}_{20}\text{BNO}_2$  257.1587, Found 257.1585.

$^1\text{H}$  NMR spectroscopic data was in agreement with the reported value.<sup>3</sup>

### 5-Methoxy-1-methyl-2-(4,4,5,5-tetramethyl-1,3,2-dioxaborolan-2-yl)-1H-indole (4-B).

[CAS: 1256360-41-4]

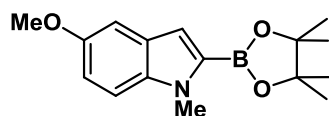

Method A was used.  $R_f$  0.057 (Hexane/EtOAc = 40/1). White solid (69 mg, 48%).

$^1\text{H}$  NMR ( $\text{C}_6\text{D}_6$ , 399.78 MHz):  $\delta$  1.13 (s, 12H), 3.45 (s, 3H), 3.68 (s, 3H), 6.99 (d,  $J = 9.2$  Hz, 1H), 7.08 (d,  $J = 2.6$  Hz, 1H), 7.19 (d,  $J = 2.6$  Hz, 1H), 7.56 (s, 1H).

$^{13}\text{C}$  NMR ( $\text{C}_6\text{D}_6$ , 100.53 MHz):  $\delta$  24.9, 30.1, 32.2, 55.2, 83.6, 102.4, 110.9, 114.9, 115.4, 136.53, 154.9.

HRMS (EI): Calcd for  $\text{C}_{16}\text{H}_{22}\text{BNO}_3$  287.1693, Found 287.1695.

$^1\text{H}$  NMR spectroscopic data was in agreement with the reported value.<sup>3</sup>

### 5-Fluoro-1-methyl-2-(4,4,5,5-tetramethyl-1,3,2-dioxaborolan-2-yl)-1H-indole (5-B).

[CAS: 1683582-67-3]

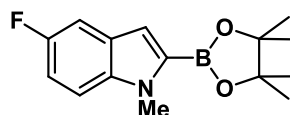

Method A was used.  $R_f$  0.085 (Hexane/EtOAc = 40/1). White solid (103 mg, 75%).

$^1\text{H}$  NMR ( $\text{C}_6\text{D}_6$ , 399.78 MHz):  $\delta$  1.10 (s, 12H), 3.57 (s, 3H), 6.79 (dd,  $J = 4.1, 9.2$  Hz, 1H), 7.00 (dt,  $J = 2.3, 9.2$  Hz, 1H), 7.28 (dd,  $J = 2.3, 9.6$  Hz, 1H), 7.36 (s, 1H).

<sup>3</sup> Furukawa, T.; Tobisu, M.; Chatani, N. *Chem. Commun.* **2015**, 51, 6508.

$^{13}\text{C}$  NMR ( $\text{C}_6\text{D}_6$ , 100.53 MHz):  $\delta$  24.8, 32.2, 83.7, 106.3 (d,  $J = 23$  Hz), 110.8 (d,  $J = 9.5$  Hz), 112.2 (d,  $J = 27$  Hz), 115.1 (d,  $J = 4.8$  Hz), 128.7 (d,  $J = 9.5$  Hz), 137.5, 158.5 (d,  $J = 234$  Hz).

HRMS (EI): Calcd for  $\text{C}_{15}\text{H}_{20}\text{BFNO}_2$  276.1568, Found 276.1570.

$^1\text{H}$  NMR spectroscopic data was in agreement with the reported value.<sup>3</sup>

**5-Chloro-1-methyl-2-(4,4,5,5-tetramethyl-1,3,2-dioxaborolan-2-yl)-1*H*-indole (6-B).**

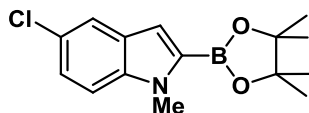

Method A was used. After purification by flush column chromatography over silica gel, a mixture of borylated product **6B** and **6** were obtained (**6-B**: 66%, **6**: 22%). GC/MS analysis revealed the existence of **6-B** and **6**; **6-B** had an  $m/z$  of 291 ( $\text{M}^+$ ), and **6** had an  $m/z$  of 165 ( $\text{M}^+$ ). The identity and ratio of **6** and **6B** was determined by the  $^1\text{H}$ NMR spectrum of the mixture. The resonances specific to each compound are as follows:  $^1\text{H}$  NMR ( $\text{C}_6\text{D}_6$ , 399.78 MHz):  $\delta$  0.454 (s, 3H, **6**), 3.52 (s, 3H, **6-B**).

$R_f$  0.086 (Hexane/EtOAc = 40/1). White solid as a 3:1 mixture of **6-B** and **6** (114 mg). Mp = 111 °C.

$^1\text{H}$  NMR ( $\text{C}_6\text{D}_6$ , 399.78 MHz):  $\delta$  1.10 (s, 12H), 3.52 (s, 3H), 6.76 (d, 1H,  $J = 8.8$  Hz), 7.23 (dd,  $J = 2.0, 8.7$  Hz, 1H), 7.33 (s, 1H), 7.60 (d,  $J = 1.9$  Hz, 1H).

$^{13}\text{C}$  NMR ( $\text{C}_6\text{D}_6$ , 100.53 MHz):  $\delta$  24.8, 32.1, 83.8, 111.1, 114.8, 121.4, 123.9, 125.7, 129.5, 139.0.

IR (ATR): 2977 w, 2927 w, 2361 m, 2339 w, 1735 w, 1649 w, 1558 w, 1526 m, 1438 w, 1361 s, 1306 s, 1264 m, 1208 w, 1137 s, 1106 m, 1077 m, 1030 m, 974 w, 949 w, 866 m, 849 s, 805 m, 780 w, 732 w, 692 w, 671m.

MS  $m/z$  (% relative intensity): 293 (32), 292 (24), 291 ( $\text{M}^+$ , 100), 290 (25), 218 (12), 209 (18), 208 (17), 207 (10), 206 (31), 205 (12), 193 (12), 192 (21), 191 (35), 190 (22).

HRMS (EI): Calcd for  $\text{C}_{15}\text{H}_{19}\text{BClNO}_2$  291.1197, Found 291.1204.

**5-Bromo-1-methyl-2-(4,4,5,5-tetramethyl-1,3,2-dioxaborolan-2-yl)-1*H*-indole (7-B)** [CAS: 1192037-87-8] and **1-methyl-5-(4,4,5,5-tetramethyl-1,3,2-dioxaborolan-2-yl)-1*H*-indole (7-B')**. [CAS: 837392-62-8]

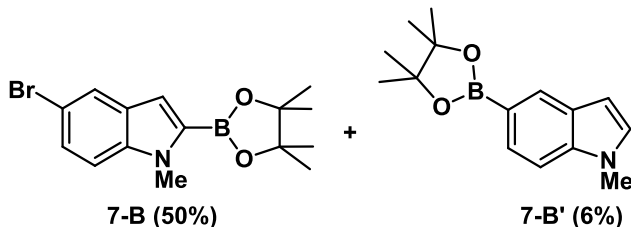

Method A was used. After purification by flush column chromatography over silica gel, a mixture of two borylated products and **7** was obtained (**7-B**: 50%, **7-B'**: 6%, **7**: 20%). GC/MS analysis revealed the existence of two borylated products and **7**; **7-B** had an  $m/z$  of 335 ( $\text{M}^+$ ), **7-B'** had an  $m/z$  of 257

(M<sup>+</sup>), and **7** had an m/z of 209 (M<sup>+</sup>). The identity and ratio of each of these was determined by the <sup>1</sup>H NMR spectrum of the mixture. The resonances specific to each isomer are as follows: <sup>1</sup>H NMR (C<sub>6</sub>D<sub>6</sub>, 399.78 MHz): δ 2.74 (s, 3H, **7**), 3.50 (s, 3H, **7-B**), 3.69 (s, 3H, **7-B'**).

MS m/z (% relative intensity) **7-B**: 338 (16), 337 (99), 336 (39), 335 (M<sup>+</sup>, 100), 334 (23), 255 (15), 253 (15), 252 (25), 251 (11), 250 (22), 237 (24), 236 (24), 235 (27), 234 (14), 183 (11), 156 (10).

**7-B'**: 258 (18), 257 (M<sup>+</sup>, 100), 256 (25), 184 (21), 175 (21), 172 (31), 158 (15), 157 (36), 156 (25).

HRMS (EI) **7-B**: Calcd for C<sub>15</sub>H<sub>19</sub>BBrNO<sub>2</sub> 335.0692, Found 335.0689.

**7-B'**: Calcd for C<sub>15</sub>H<sub>20</sub>BNO<sub>2</sub> 257.1587, Found 257.1583.

<sup>1</sup>H NMR spectroscopic data was in agreement with the reported value.<sup>4</sup>

#### 1,4-Dimethyl-2-(4,4,5,5-tetramethyl-1,3,2-dioxaborolan-2-yl)-1*H*-indole (**8-B**).

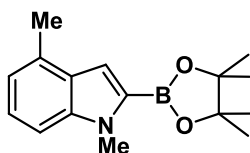

Method A was used. R<sub>f</sub> 0.14 (Hexane/EtOAc = 40/1). White solid (69 mg, 51%). Mp = 151 °C.

<sup>1</sup>H NMR (C<sub>6</sub>D<sub>6</sub>, 399.78 MHz): δ 1.14 (s, 12H), 2.51 (s, 3H), 3.71 (s, 3H), 6.97 (d, *J* = 7.4 Hz, 1H), 7.04 (d, *J* = 8.2 Hz, 1H), 7.25 (t, *J* = 8.2 Hz, 1H), 7.64 (s, 1H).

<sup>13</sup>C NMR (C<sub>6</sub>D<sub>6</sub>, 100.53 MHz): δ 18.8, 24.9, 32.3, 83.6, 107.9, 114.3, 120.1, 124.0, 128.8, 131.4, 140.8.

IR (ATR): 2975 w, 2921 w, 2361 w, 1606 w, 1580 w, 1522 m, 1496 w, 1467 w, 1383 m, 1349 w, 1317 m, 1293 m, 1258 m, 1239 m, 1216 w, 1139 m, 1111 w, 1070 m, 964 w, 858 m, 827 w, 805 w, 770m, 739 m, 688 m, 670 w.

MS m/z (% relative intensity): 272 (18), 271 (M<sup>+</sup>, 100), 270 (25), 198 (16), 189 (29), 188 (11), 172 (10), 171 (29), 170 (24).

HRMS (EI): Calcd for C<sub>16</sub>H<sub>22</sub>BNO<sub>2</sub> 271.1744, Found 271.17430.

#### 2-(Benzo[*b*]thiophen-2-yl)-4,4,5,5-tetramethyl-1,3,2-dioxaborolane (**9-B**). [CAS: 376584-76-8]

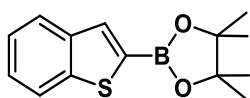

Method A was used. R<sub>f</sub> 0.086 (Hexane/EtOAc = 40/1). White solid (122 mg, 94%).

<sup>1</sup>H NMR (C<sub>6</sub>D<sub>6</sub>, 399.78 MHz): δ 1.10 (s, 12H), 7.01-7.09 (m, 2H), 7.54-7.58 (m, 2H), 8.06 (s, 1H).

<sup>1</sup>H NMR (CDCl<sub>3</sub>, 399.78 MHz): δ 1.38 (s, 12H), 7.35-7.39 (m, 2H), 7.85-7.92 (m, 3H).

<sup>13</sup>C NMR (C<sub>6</sub>D<sub>6</sub>, 100.53 MHz): δ 24.8, 84.3, 124.4, 124.7, 122.9, 125.6, 135.3, 141.0, 144.4.

HRMS (EI) **A**: Calcd for C<sub>14</sub>H<sub>17</sub>BO<sub>2</sub>S 260.1042, Found 260.1040.

<sup>4</sup> Stadlwieser, J. F.; Dambaur, M. E. *Helv. Chim. Acta.* **2006**, 89, 936.

<sup>1</sup>H NMR spectroscopic data was in agreement with the reported value.<sup>5</sup>

**2-(5-Chloro-3-methylbenzo[*b*]thiophen-2-yl)-4,4,5,5-tetramethyl-1,3,2-dioxaborolane (10-B).**

[CAS: 1809298-96-1]

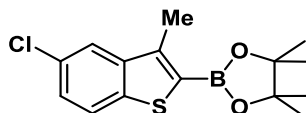

Method A was used. *R*<sub>f</sub> 0.22 (Hexane/EtOAc = 40/1). White solid (140 mg, 91%).

<sup>1</sup>H NMR (C<sub>6</sub>D<sub>6</sub>, 399.78 MHz): δ 1.07 (s, 12H), 2.51 (s, 3H), 7.04 (dd, *J* = 1.8, 8.7 Hz, 1H), 7.18 (d, *J* = 8.7 Hz, 1H), 7.63 (d, *J* = 1.8 Hz, 1H).

<sup>13</sup>C NMR (C<sub>6</sub>D<sub>6</sub>, 100.53 MHz): δ 14.0, 24.8, 84.1, 122.7, 124.0, 126.1, 130.5, 141.9, 142.9, 143.4.

HRMS (EI): Calcd for C<sub>15</sub>H<sub>18</sub>BClO<sub>2</sub>S 308.0809, Found 308.0811.

<sup>1</sup>H NMR spectroscopic data was in agreement with the reported value.<sup>5</sup>

**2-(Benzofuran-2-yl)-4,4,5,5-tetramethyl-1,3,2-dioxaborolane (11-B).** [CAS: 402503-13-3]

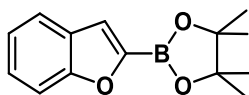

Method A was used. *R*<sub>f</sub> 0.057 (Hexane/EtOAc = 40/1). White solid (79 mg, 65%).

<sup>1</sup>H NMR (C<sub>6</sub>D<sub>6</sub>, 399.78 MHz): δ 1.08 (s, 12H), 6.98-7.08 (m, 2H), 7.34-7.36 (m, 1H), 7.40-7.42 (m, 1H), 7.48 (d, *J* = 0.92 Hz, 1H).

<sup>1</sup>H NMR (CDCl<sub>3</sub>, 399.78 MHz): δ 1.39 (s, 12H), 7.23 (t, *J* = 7.8 Hz, 1H), 7.34 (td, 0.9, *J* = 8.2 Hz, 1H), 7.40 (s, 1H), 7.57 (d, *J* = 8.2 Hz, 1H), 7.63 (1H, *J* = 7.8 Hz, 1H).

<sup>13</sup>C NMR (C<sub>6</sub>D<sub>6</sub>, 100.53 MHz): δ 24.8, 84.4, 112.1, 120.1, 122.2, 123.0, 126.3, 158.3. One carbon peak is overlapped with solvent peaks.

HRMS (EI): Calcd for C<sub>14</sub>H<sub>17</sub>BO<sub>3</sub> 244.1271, Found 244.1276.

<sup>1</sup>H NMR spectroscopic data was in agreement with the reported value.<sup>5</sup>

**1-Methyl-2-(4,4,5,5-tetramethyl-1,3,2-dioxaborolan-2-yl)-1*H*-pyrrole (12-B).**

[CAS: 850567-47-4]

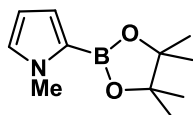

Method B was used except that the reaction was conducted in *N*-methyl pyrrole (1.0 mL).

*R*<sub>f</sub> 0.14 (Hexane/EtOAc = 40/1). White solid (52 mg, 50%).

<sup>1</sup>H NMR (C<sub>6</sub>D<sub>6</sub>, 399.78 MHz): δ 1.11 (s, 12H), 3.52 (s, 3H), 6.30 (dd, *J* = 1.4, 2.3 Hz, 1H), 7.22 (t, *J*

---

<sup>5</sup> Furukawa, T.; Tobisu, M.; Chatani, N. *J. Am. Chem. Soc.* **2015**, *137*, 12211.

= 1.8 Hz, 1H), 7.33 (dd,  $J$  = 1.4, 2.3 Hz, 1H).

$^{13}\text{C}$  NMR ( $\text{C}_6\text{D}_6$ , 100.53 MHz):  $\delta$  24.9, 36.3, 83.0, 109.2, 123.4. One carbon peak is overlapped with solvent peaks.

HRMS (EI): Calcd for  $\text{C}_{11}\text{H}_{18}\text{BNO}_2$  207.1431, Found 207.1431.

$^1\text{H}$  NMR spectroscopic data was in agreement with the reported value.<sup>3</sup>

**4,4,5,5-Tetramethyl-2-(thiophen-2-yl)-1,3,2-dioxaborolane (13-B) and 2,5-bis(4,4,5,5-tetramethyl-1,3,2-dioxaborolan-2-yl)thiophene (13-2B).**

Method A was used. The product was obtained as a mixture of mono and diborylated thiophenes. It was possible to purify two products by flush column chromatography over silica gel.

**4,4,5,5-Tetramethyl-2-(thiophen-2-yl)-1,3,2-dioxaborolane (13-B).** [CAS: 193978-23-3]

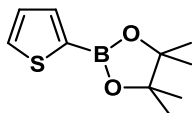

$R_f$  0.22 (Hexane/EtOAc = 40/1). White solid (41 mg, 39%).

$^1\text{H}$  NMR ( $\text{C}_6\text{D}_6$ , 399.78 MHz):  $\delta$  1.08 (s, 12H), 6.89 (m, 1H), 7.18 (dd,  $J$  = 0.92, 4.6 Hz, 1H), 7.88-7.89 (m, 1H).

$^{13}\text{C}$  NMR ( $\text{C}_6\text{D}_6$ , 100.53 MHz):  $\delta$  24.8, 84.0, 128.5, 132.8, 137.7.

HRMS (EI): Calcd for  $\text{C}_{10}\text{H}_{15}\text{BO}_2\text{S}$  210.0886, Found 210.0889.

$^1\text{H}$  NMR spectroscopic data was in agreement with the reported value.<sup>6</sup>

**2,5-Bis(4,4,5,5-tetramethyl-1,3,2-dioxaborolan-2-yl)thiophene (13-2B).** [CAS: 175361-81-6]

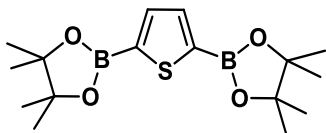

$R_f$  0.14 (Hexane/EtOAc = 40/1). White solid (54 mg, 32%).

$^1\text{H}$  NMR ( $\text{C}_6\text{D}_6$ , 399.78 MHz):  $\delta$  1.03 (s, 24H), 7.97 (s, 2H).

$^1\text{H}$  NMR ( $\text{CDCl}_3$ , 399.78 MHz):  $\delta$  1.34 (s, 24H), 7.66 (s, 2H).

$^{13}\text{C}$  NMR ( $\text{C}_6\text{D}_6$ , 100.53 MHz):  $\delta$  24.8, 84.1, 138.6.

HRMS (EI): Calcd for  $\text{C}_{16}\text{H}_{26}\text{B}_2\text{O}_4\text{S}$  336.1738, Found 336.1738.

$^1\text{H}$  NMR spectroscopic data was in agreement with the reported value.<sup>7</sup>

<sup>6</sup> Boller, T. M.; Murphy, J. M.; Hapke, M.; Ishiyama, T.; Miyaura, N.; Hartwig, J. F. *J. Am. Chem. Soc.* **2005**, *127*, 14263.

<sup>7</sup> Guerrand, H. D. S.; Marciasini, L. D.; Jousseume, M.; Vaultier, M.; Pucheault, M. *Chem. Eur. J.* **2014**, *20*, 5573.

**4,4,5,5-Tetramethyl-2-(5-methylthiophen-2-yl)-1,3,2-dioxaborolane (14-B).** [CAS: 476004-80-5]

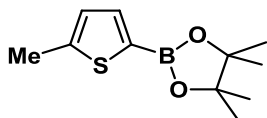

Method A was used.  $R_f$  0.14 (Hexane/EtOAc = 40/1). Colorless oil (108 mg, 96%).

$^1\text{H}$  NMR ( $\text{C}_6\text{D}_6$ , 399.78 MHz):  $\delta$  1.09 (s, 12H), 2.11 (s, 3H), 6.62 (d,  $J$  = 3.3 Hz, 1H), 7.8 (d,  $J$  = 3.5 Hz, 1H).

$^{13}\text{C}$  NMR ( $\text{C}_6\text{D}_6$ , 100.53 MHz):  $\delta$  15.1, 24.9, 83.9, 127.5, 138.4, 147.8.

HRMS (EI): Calcd for  $\text{C}_{11}\text{H}_{17}\text{BO}_3\text{S}$  208.1271, Found 208.1272.

$^1\text{H}$  NMR spectroscopic data was in agreement with the reported value.<sup>5</sup>

**2-(5-Methoxythiophen-2-yl)-4,4,5,5-tetramethyl-1,3,2-dioxaborolane (15-B).**

[CAS: 596819-12-4]

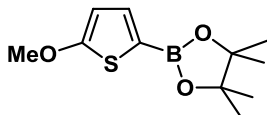

Method A was used.  $R_f$  0.14 (Hexane/EtOAc = 40/1). Colorless oil (109 mg, 91%).

$^1\text{H}$  NMR ( $\text{C}_6\text{D}_6$ , 399.78 MHz):  $\delta$  1.09 (s, 12H), 3.24 (s, 3H), 6.07 (d,  $J$  = 4.0 Hz, 1H), 7.62 (d,  $J$  = 3.9 Hz, 1H).

$^1\text{H}$  NMR ( $\text{CDCl}_3$ , 399.78 MHz):  $\delta$  1.32 (s, 12H), 3.92 (s, 3H), 6.30 (d,  $J$  = 3.8 Hz, 1H), 7.33 (d,  $J$  = 3.8 Hz, 1H).

$^{13}\text{C}$  NMR ( $\text{C}_6\text{D}_6$ , 100.53 MHz):  $\delta$  24.9, 59.7, 83.8, 106.4, 137.2, 173.5.

HRMS (EI): Calcd for  $\text{C}_{16}\text{H}_{26}\text{B}_2\text{O}_4\text{S}$  240.0991, Found 240.0994.

$^1\text{H}$  NMR spectroscopic data was in agreement with the reported value.<sup>5</sup>

**4,4,5,5-Tetramethyl-2-(5-methylfuran-2-yl)-1,3,2-dioxaborolane (16-B).** [CAS: 338998-93-9]

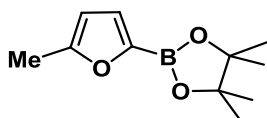

Method A was used.  $R_f$  0.028 (Hexane/EtOAc = 40/1). Colorless oil (71 mg, 68%).

$^1\text{H}$  NMR ( $\text{C}_6\text{D}_6$ , 399.78 MHz):  $\delta$  1.09 (s, 12H), 1.99 (s, 3H), 5.81 (d,  $J$  = 2.3 Hz, 1H), 7.22 (d,  $J$  = 3.2 Hz, 1H).

$^{13}\text{C}$  NMR ( $\text{C}_6\text{D}_6$ , 100.53 MHz):  $\delta$  13.6, 24.8, 83.7, 107.2, 125.4, 157.6.

HRMS (EI): Calcd for  $\text{C}_{11}\text{H}_{17}\text{BO}_3$  208.1271, Found 208.1270.

$^1\text{H}$  NMR spectroscopic data was in agreement with the reported value.<sup>8</sup>

---

<sup>8</sup> Hatanaka, T.; Ohki, Y.; Tatsumi, K. *Chem. Asian. J.* **2010**, *5*, 1657.



**4,4,5,5-Tetramethyl-2-phenyl-1,3,2-dioxaborolane (17-B).** [CAS: 24388-23-6]

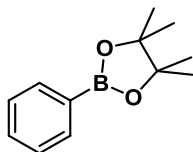

Method B was used.  $R_f$  0.20 (Hexane/EtOAc = 40/1). White solid (49 mg, 48%).

$^1\text{H}$  NMR ( $\text{C}_6\text{D}_6$ , 399.78 MHz):  $\delta$  1.11 (s, 12H), 7.21-7.22 (m, 3H), 8.15-8.17 (m, 2H).

$^1\text{H}$  NMR ( $\text{CDCl}_3$ , 399.78 MHz):  $\delta$  1.35 (s, 12H), 7.34-7.38 (m, 2H), 7.44-7.48 (m, 1H), 7.78-7.82 (m, 1H).

$^{13}\text{C}$  NMR ( $\text{CDCl}_3$ , 100.53 MHz):  $\delta$  25.0, 83.9, 127.8, 131.4, 134.9.

HRMS (EI): Calcd for  $\text{C}_{12}\text{H}_{17}\text{BO}_2$  204.1322, Found 204.1321.

**Borylation of toluene (Entry 2, Table 3).** [CAS: 253342-48-2] and [CAS: 195062-57-8]

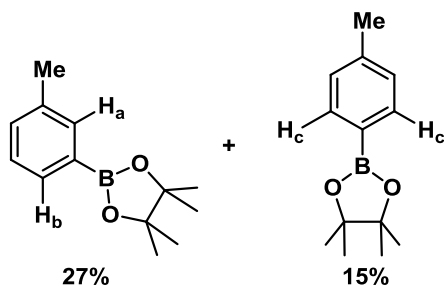

Method B was followed except that the reaction was conducted in toluene (1.0 mL). After purification by flash column chromatography over silica gel eluting with hexane/AcOEt = 20/1, a mixture of two isomers was obtained. GC/MS analysis revealed the two isomers of the borylated products had an  $m/z$  of 218 ( $\text{M}^+$ ). The identity and ratio of each of the two isomers were determined by comparing the  $^1\text{H}$  NMR spectrum of the product mixture with those reported in the literature.<sup>9</sup> The resonances specific to each isomer are as follows:  $^1\text{H}$  NMR ( $\text{CDCl}_3$ , 399.78 MHz): 7.60-7.64 ppm (m, 2H, meta isomer,  $\text{H}_a$  and  $\text{H}_b$ ), 7.70 ppm (d,  $J = 7.8$  Hz, 2H, para isomer,  $\text{H}_c$ ).

<sup>9</sup> Ishiyama, T.; Takagi, J.; Ishida, K.; Miyaura, N.; Hartwig, J. F. *J. Am. Chem. Soc.* **2002**, *124*, 390.

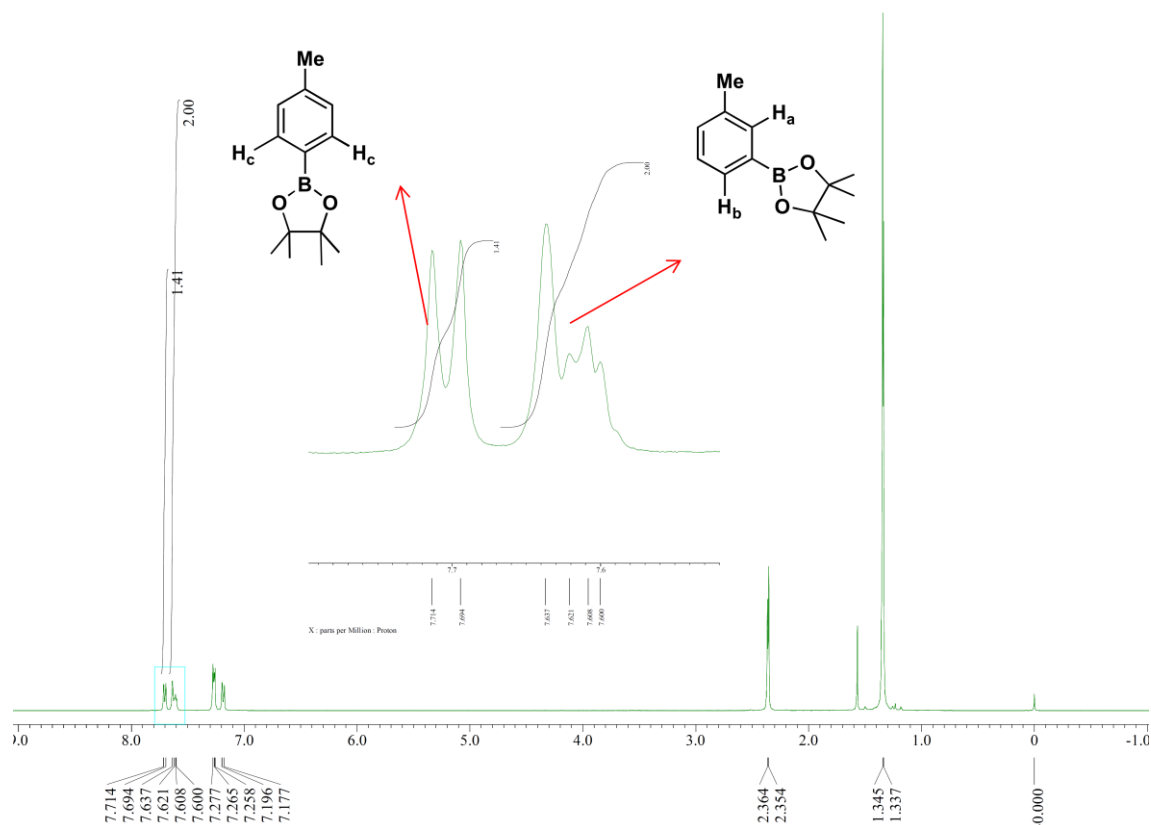

**Borylation of anisole (Entry 3, Table 3).** [CAS: 325142-84-5] and [CAS: 171364-79-7]

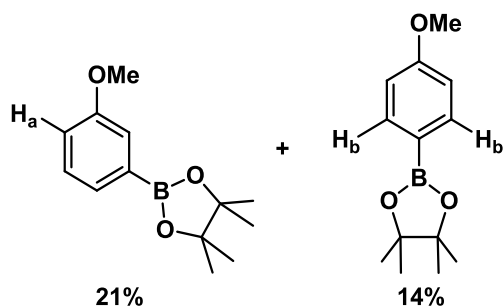

Method B was followed except that the reaction was conducted in anisole (1.0 mL). After purification by flash column chromatography over silica gel eluting with hexane/AcOEt = 20/1, a mixture of two isomers was obtained. GC/MS analysis revealed the two isomers of the borylated products had an  $m/z$  of 232 ( $\text{M}^+$ ). The identity and ratio of each of the two isomers were determined by comparing the  $^1\text{H}$  NMR spectrum of the product mixture with those reported in the literature.<sup>9</sup> The resonances specific to each isomer are as follows:  $^1\text{H}$  NMR ( $\text{CDCl}_3$ , 399.78 MHz): 7.01 ppm (ddd,  $J = 0.8, 2.8, 8.0$  Hz, 1H, meta isomer,  $\text{H}_a$ ), 7.75 ppm (d,  $J = 8.2$  Hz, 2H, para isomer,  $\text{H}_b$ ).

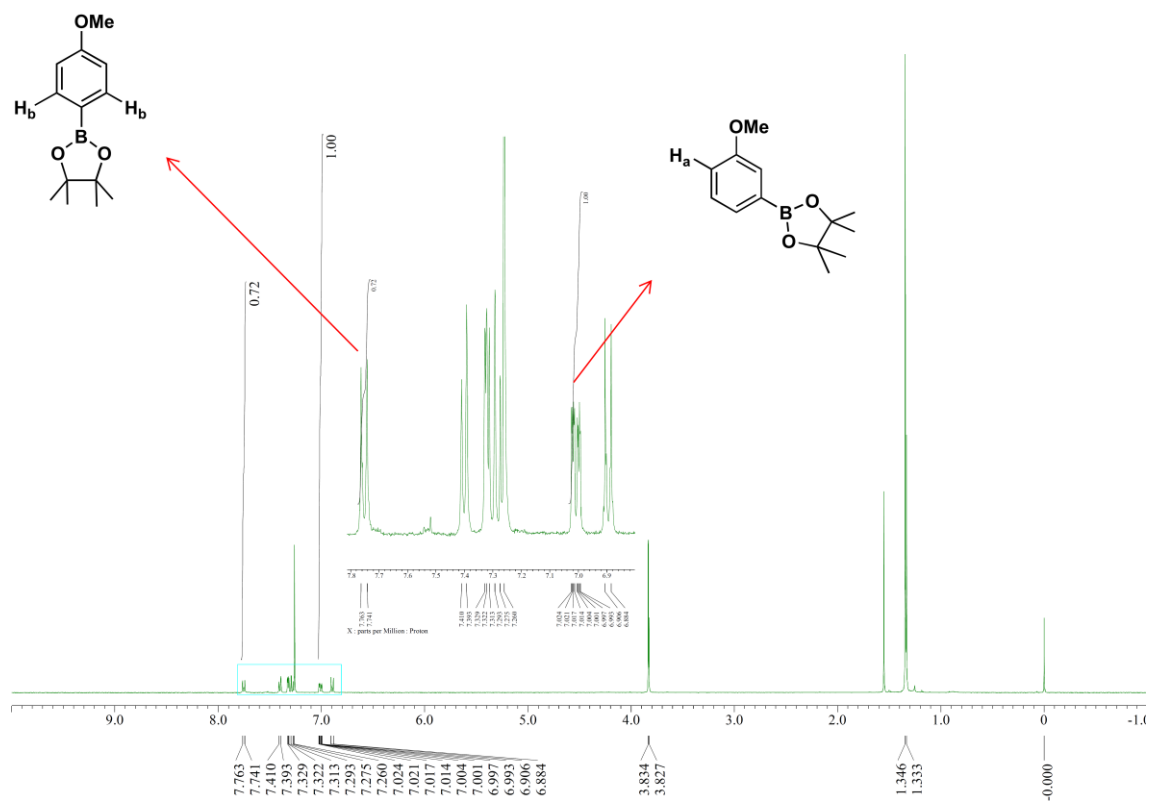

#### Borylation of trifluoromethylbenzene (Entry 4, Table 3).

[CAS: 325142-82-3] and [CAS: 214360-65-3]

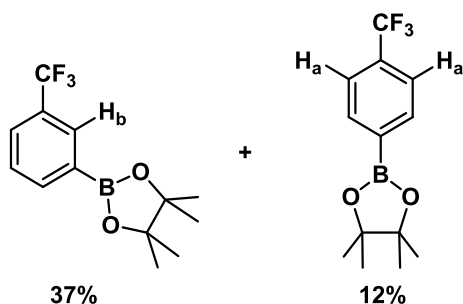

Method B was followed except that the reaction was conducted in trifluoromethylbenzene (1.0 mL). After purification by flash column chromatography over silica gel eluting with hexane/AcOEt = 40/1, a mixture of two isomers was obtained. GC/MS analysis revealed the two isomers of the borylated products had an  $m/z$  of 272 ( $\text{M}^+$ ). The identity and ratio of each of the two isomers were determined by comparing the  $^1\text{H}$  NMR spectrum of the product mixture with those reported in the literature.<sup>9</sup> The resonances specific to each isomer are as follows:  $^1\text{H}$  NMR ( $\text{C}_6\text{D}_6$ , 399.78 MHz): 7.96 (d,  $J$  = 8.2 Hz, 1H, para isomer,  $\text{H}_a$ ), 8.46 (s, 1H, meta isomer,  $\text{H}_b$ ).

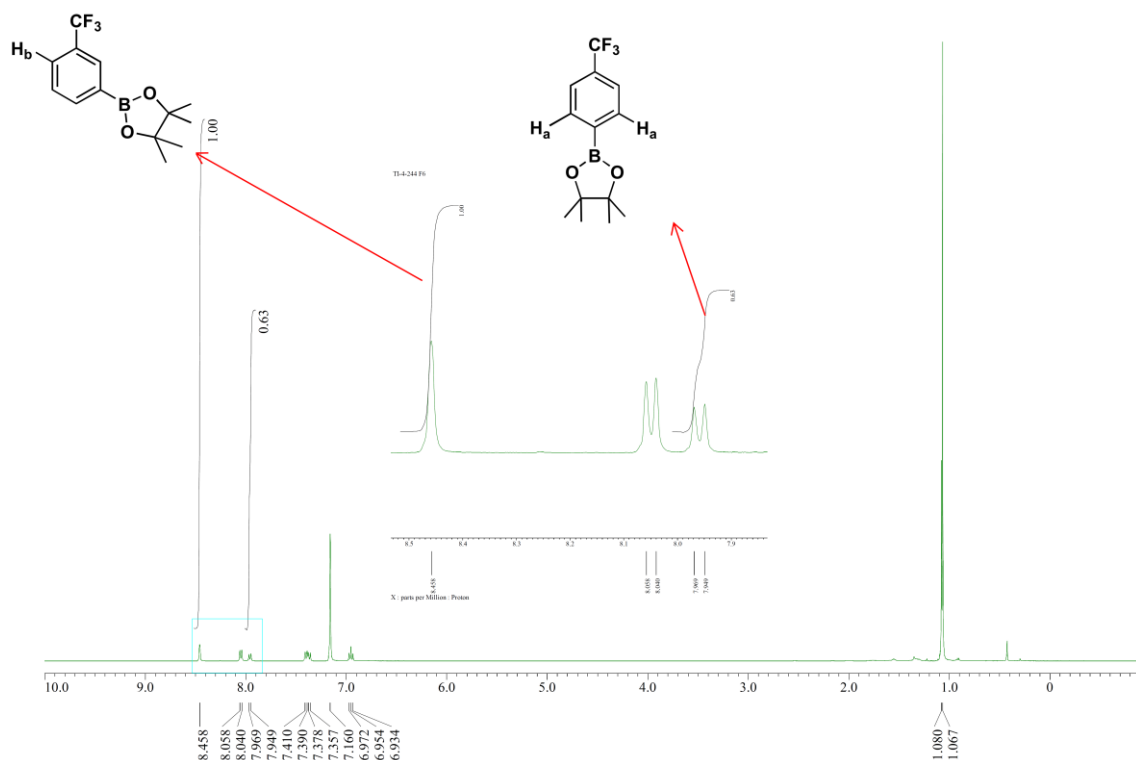

**2-(3,5-Dichlorophenyl)-4,4,5,5-tetramethyl-1,3,2-dioxaborolane (21-B).** [CAS: 68716-51-8]

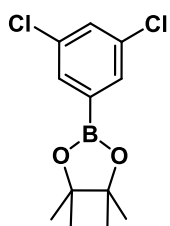

Method B was followed except that the reaction was conducted in 1,3-dichlorobenzene (1.0 mL).

White solid (42 mg, 31%).

$^1\text{H}$  NMR ( $\text{CDCl}_3$ , 399.78 MHz):  $\delta$  1.34 (s, 12H), 7.43 (t,  $J = 2.2$  Hz, 1H), 7.64 (d,  $J = 2.3$  Hz, 2H).

$^{13}\text{C}$  NMR ( $\text{CDCl}_3$ , 100.53 MHz):  $\delta$  25.0, 84.7, 131.2, 132.9, 134.9.

HRMS (EI): Calcd for  $\text{C}_{12}\text{H}_{15}\text{BCl}_2\text{O}_2$  272.0542, Found 272.0540.

**4,4,5,5-Tetramethyl-2-(naphthalen-2-yl)-1,3,2-dioxaborolane (22-B).** [CAS: 256652-04-7]

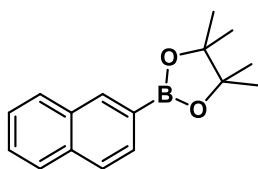

In a glovebox,  $[\text{Ir}(\text{OMe})(\text{cod})]_2$  (33.1 mg, 0.050 mmol, 0.10 equiv),  $\text{ICy}\cdot\text{HCl}$  (26.2 mg, 0.10 mmol, 0.20 equiv),  $\text{NaOt-Bu}$  (19.2 mg, 0.20 mmol, 0.40 equiv) and methylcyclohexane (1.0 mL) were added to a 10 mL-sample vial with Teflon-sealed screwcap, and stirred for 5 min at room

temperature. A naphthalene (384.1 mg, 3.0 mmol, 6.0 equiv) and **1g** (113.1 mg, 1.0 mmol, 2.0 equiv) were then added, and the cap was applied to seal the vial. The vial was stirred at 110 °C for 4 h. After the reaction mixture was cooled to room temperature, pinacol (236 mg, 2.0 mmol) in THF (2.0 mL) was added and stirred for 1.5 h at room temperature under N<sub>2</sub>. The crude mixture was filtered through a pad of Celite eluting with AcOEt. The filtrate was concentrated in vacuo and analyzed by <sup>1</sup>H NMR using 1,2-dichloroethane as an internal standard. The crude mixture was concentrated under reduced pressure, and purified by flash column chromatography over silica gel eluting with hexane/AcOEt (40/1) solution. The filtrate was concentrated in vacuo to give a pure borylated product as a white solid (63.5 mg, 50%).

R<sub>f</sub> 0.17 (Hexane/EtOAc = 40/1). White solid (64 mg, 50%).

<sup>1</sup>H NMR (C<sub>6</sub>D<sub>6</sub>, 399.78 MHz): δ 1.16 (s, 12H), 7.19-7.24 (m, 2H), 7.6 (d, *J* = 8.2 Hz, 1H), 7.69 (t, *J* = 18.3, 18.3 Hz, 2H), 8.23 (d, *J* = 7.3 Hz, 1H), 8.75 (s, 1H).

<sup>1</sup>H NMR (CDCl<sub>3</sub>, 399.78 MHz): δ 1.40 (s, 12H), 7.47-7.53 (m, 2H), 7.82-7.83 (m, 3H), 7.89 (d, *J* = 7.8 Hz, 1H), 8.37 (s, 1H).

<sup>13</sup>C NMR (CDCl<sub>3</sub>, 100.53 MHz): δ 25.0, 84.0, 125.9, 127.0, 127.8, 128.7, 130.5, 132.9, 135.1, 136.3. One carbon peak is overlapped with solvent peaks.

HRMS (EI): Calcd for C<sub>16</sub>H<sub>19</sub>BO<sub>2</sub> 254.1478, Found 254.1482.

<sup>1</sup>H NMR spectroscopic data was in agreement with the reported value.<sup>10</sup>

## 2-(5-Chloro-3-methylbenzo[*b*]thiophen-2-yl)-5,5-dimethyl-1,3,2-dioxaborinane (10-Bnep).

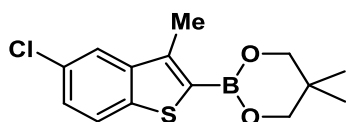

Method A was followed except that after the reaction mixture was cooled to room temperature, the neopentyl glycol (208 mg, 2.0 mmol) in THF (2.0 mL) was added and stirred for 1.5 h at room temperature under N<sub>2</sub>.

R<sub>f</sub> 0.085 (Hexane/EtOAc = 40/1). White Solid (130 mg, 88%). Mp = 119 °C.

<sup>1</sup>H NMR (C<sub>6</sub>D<sub>6</sub>, 399.78 MHz): δ 0.53 (s, 6H), 2.50 (s, 3H), 3.32 (s, 4H), 7.08 (dd, *J* = 1.8, 7.8 Hz, 1H), 7.27 (d, *J* = 7.3 Hz, 1H), 7.69 (d, *J* = 2.3 Hz, 1H).

<sup>13</sup>C NMR (C<sub>6</sub>D<sub>6</sub>, 100.53 MHz): δ 13.7, 21.5, 31.5, 72.2, 122.6, 124.0, 125.7, 130.3, 141.4, 141.6, 143.5.

IR (ATR): 2964 w, 2936 w, 1895 w, 1580 w, 1555 w, 1525 m, 1475 w, 1438 w, 1415 m, 1375 w, 1341 m, 1290 s, 1272 s, 1244 s, 1149 w, 1117 s, 1074 m, 1028 w, 977 w, 933 w, 916 w, 894 w, 865 w, 850 m, 809 s, 729 w, 697 w, 669 m.

MS *m/z* (% relative intensity): 296 (38), 295 (27), 294 (M<sup>+</sup>, 100), 293 (30), 260 (12), 259 (67), 258 (21), 208 (15), 207 (14), 181 (14), 173 (15).

<sup>10</sup> Kinuta, H.; Tobisu, M.; Chatani, N. *J. Am. Chem. Soc.* **2015**, *137*, 1593.

HRMS (EI): Calcd for  $C_{14}H_{16}BClO_2S$  294.0653, Found 294.0653.

**2-(5-Chloro-3-methylbenzo[*b*]thiophen-2-yl)-4,4,6-trimethyl-1,3,2-dioxaborinane (10-Bmep).**

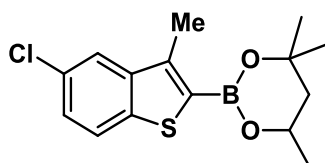

Method A was followed except that after the reaction mixture was cooled to room temperature, the 2-methylpentane-2,4-diol (236 mg, 2.0 mmol) in THF (2.0 mL) was added and stirred under  $N_2$  at room temperature for 1.5 h.

$R_f$  0.23 (Hexane/EtOAc = 40/1). Colorless oil (134 mg, 87%).

$^1H$  NMR ( $C_6D_6$ , 399.78 MHz):  $\delta$  1.00 (s, 3H), 1.06 (d,  $J$  = 6.4 Hz, 3H), 1.12-1.14 (m, 5H), 2.57 (s, 3H), 3.87-3.95 (m, 1H), 7.08 (dd,  $J$  = 1.8, 8.5 Hz, 1H), 7.28 (d,  $J$  = 8.4 Hz, 1H), 7.70 (d,  $J$  = 1.8 Hz, 1H).

$^{13}C$  NMR ( $C_6D_6$ , 100.53 MHz):  $\delta$  13.6, 23.0, 28.0, 31.1, 45.7, 65.5, 71.7, 122.5, 123.9, 125.6, 130.3, 141.1, 141.3, 143.5.

IR (ATR): 2973 w, 2914 w, 2360 w, 2340 w, 1737 w, 1581 w, 1554 w, 1523 w, 1440 w, 1396 m, 1379 w, 1344 m, 1319 w, 1286 s, 1265 s, 1243 s, 1206 m, 1160 m, 1109 m, 1077 m, 1059 w, 1027 w, 980 w, 963 w, 937 w, 901 w, 864 w, 851 w, 823 w, 799 m, 768 m, 730 w, 692 w, 972 m.

MS  $m/z$  (% relative intensity): 310 (38), 309 (26), 308 ( $M^+$ , 100), 307 (24), 254 (13), 252 (35), 251 (13), 237 (16), 225 (11), 211 (18), 210 (42), 209 (57), 208 (97), 207 (24), 182 (11), 181 (18), 173 (26), 83 (21), 55 (10), 43 (26).

HRMS (EI): Calcd for  $C_{15}H_{18}BClO_2S$  308.0809, Found 308.0804.

**2-(5-Chloro-3-methylbenzo[*b*]thiophen-2-yl)-2,3-dihydro-1*H*-naphtho[1,8-*de*][1,3,2]diazaborinine (10-Bdan).**

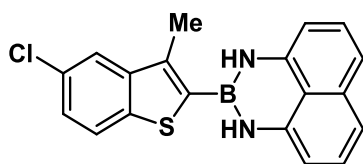

Method A was followed except that after the reaction mixture was cooled to room temperature, the 1,8-naphthalenediamine (316 mg, 2.0 mmol) in THF (2.0 mL) was added and stirred for 1.5 h at room temperature under  $N_2$ .

$R_f$  0.29 (Hexane/EtOAc = 20/1). White solid (131 mg, 75%).  $M_p$  = 173  $^{\circ}C$ .

$^1H$  NMR ( $C_6D_6$ , 399.78 MHz):  $\delta$  1.97 (s, 3H), 5.32 (s, 2H), 5.92 (dd,  $J$  = 0.92, 7.3 Hz, 2H), 7.02-7.15 (m, 5H), 7.33 (d,  $J$  = 8.2 Hz, 1H), 7.65 (d,  $J$  = 1.8 Hz, 1H).

$^{13}C$  NMR ( $C_6D_6$ , 100.53 MHz):  $\delta$  13.9, 106.8, 118.8, 120.6, 122.2, 123.8, 125.5, 130.9, 136.9, 137.0,

140.3, 140.8, 143.0.

IR (ATR): 3428 w, 3415 w, 3049 w, 2360 w, 1734 w, 1627 w, 1596 s, 1554 w, 1528 m, 1497 m, 1437 w, 1405 m, 1371 m, 1337 m, 1281 w, 1195 m, 1164 m, 1099 m, 1074 m, 1035 w, 935 w, 859 m, 814 m, 798 m, 751 s, 660 s.

MS  $m/z$  (% relative intensity): 350 (42), 349 (32), 348 ( $M^+$ , 100), 347 (29), 174 (15), 173 (14), 166 (38), 165 (21).

HRMS (EI): Calcd for  $C_{19}H_{14}BClN_2S$  348.0659, Found 348.0662.

#### Borylation of other substrates.

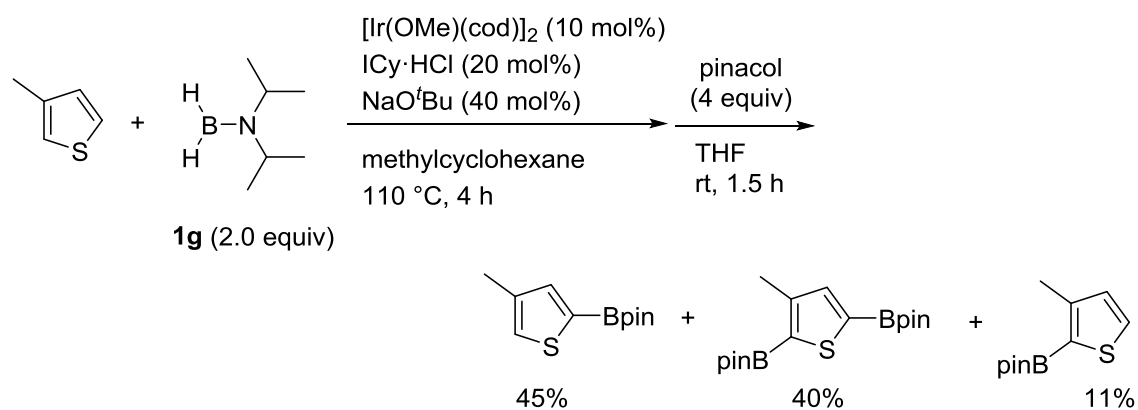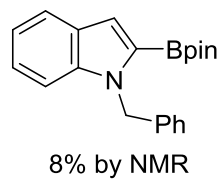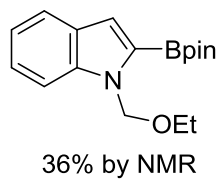

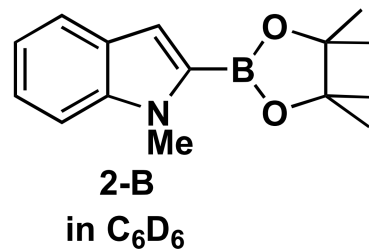

X : parts per Million : Proton

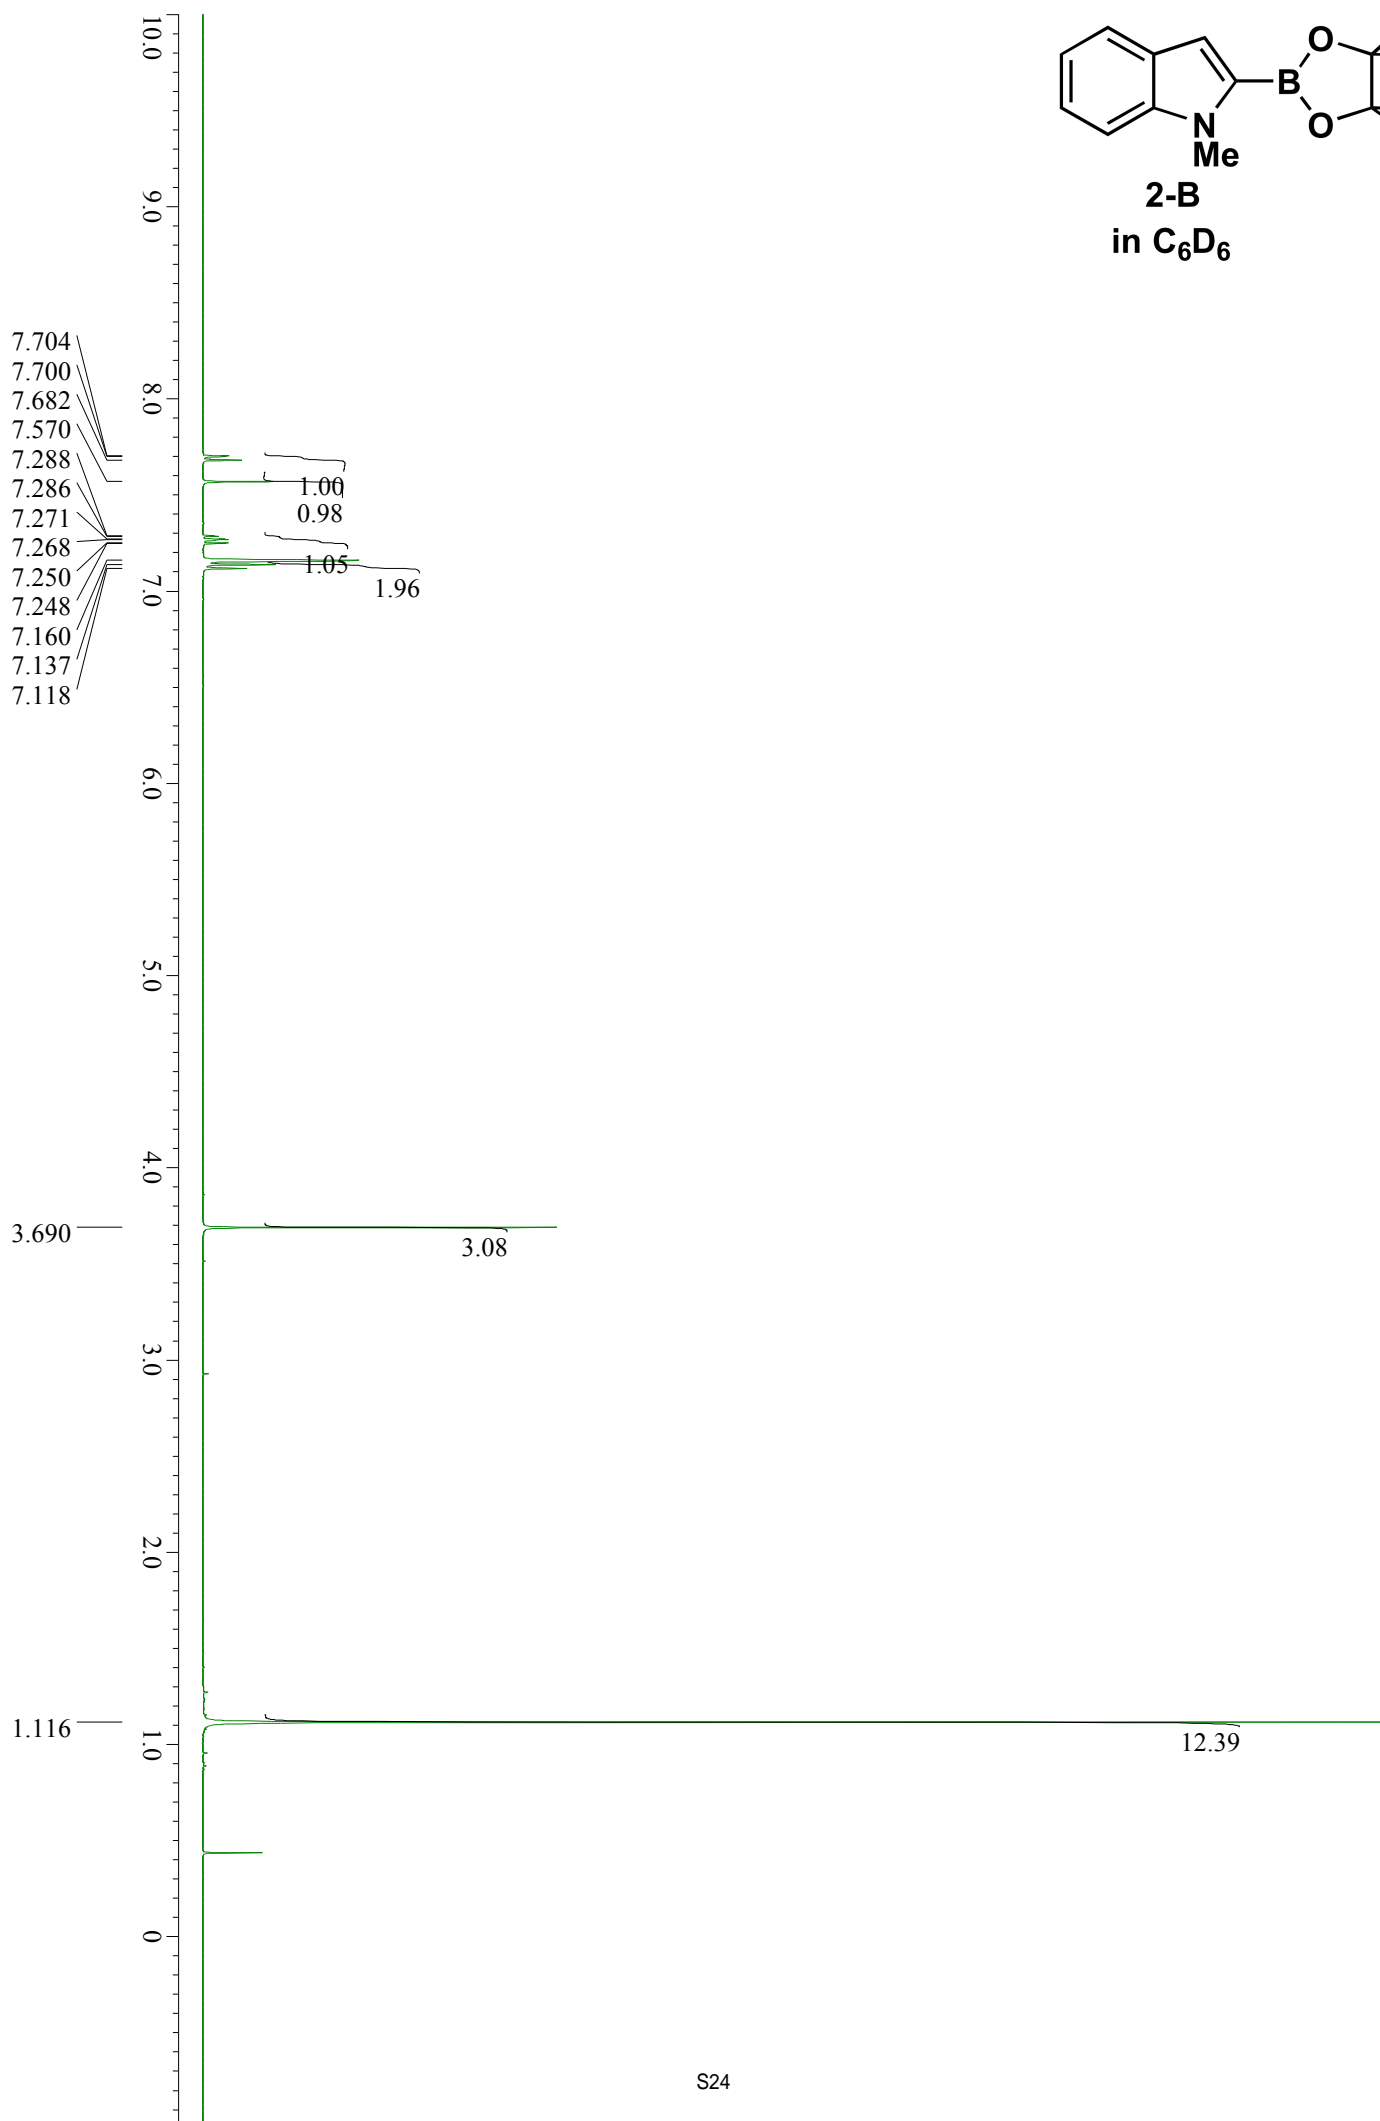



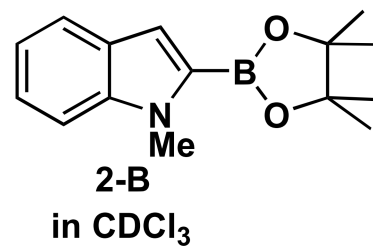

X : parts per Million : Proton

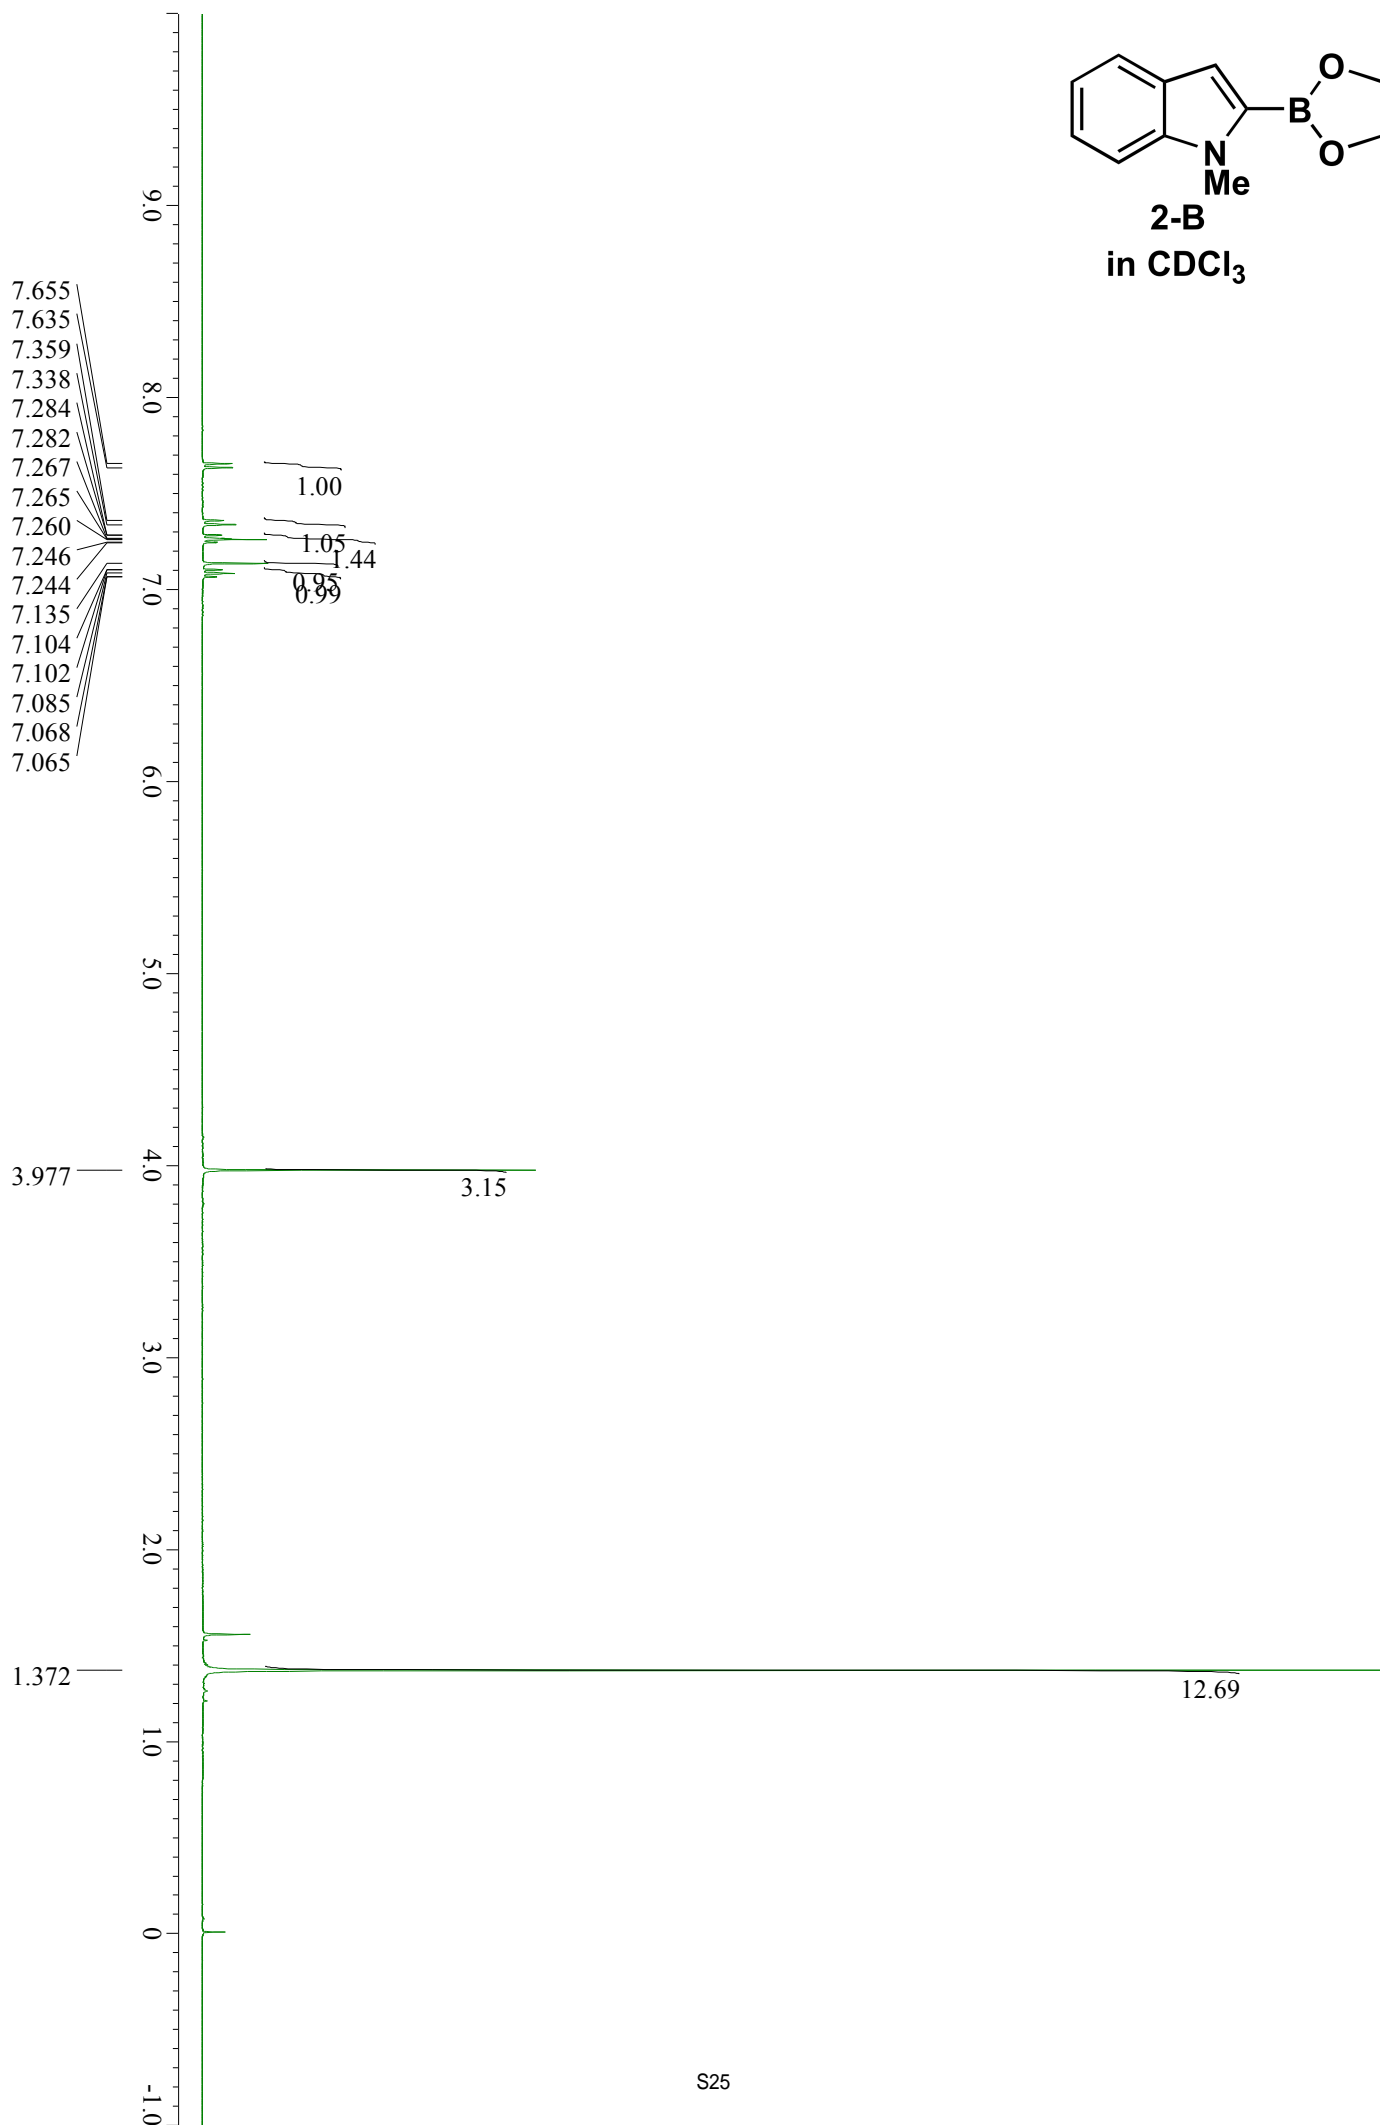

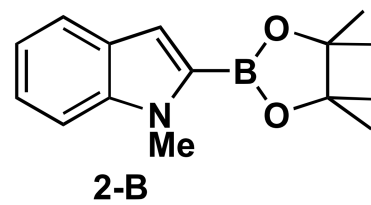

X : parts per Million : Carbon13

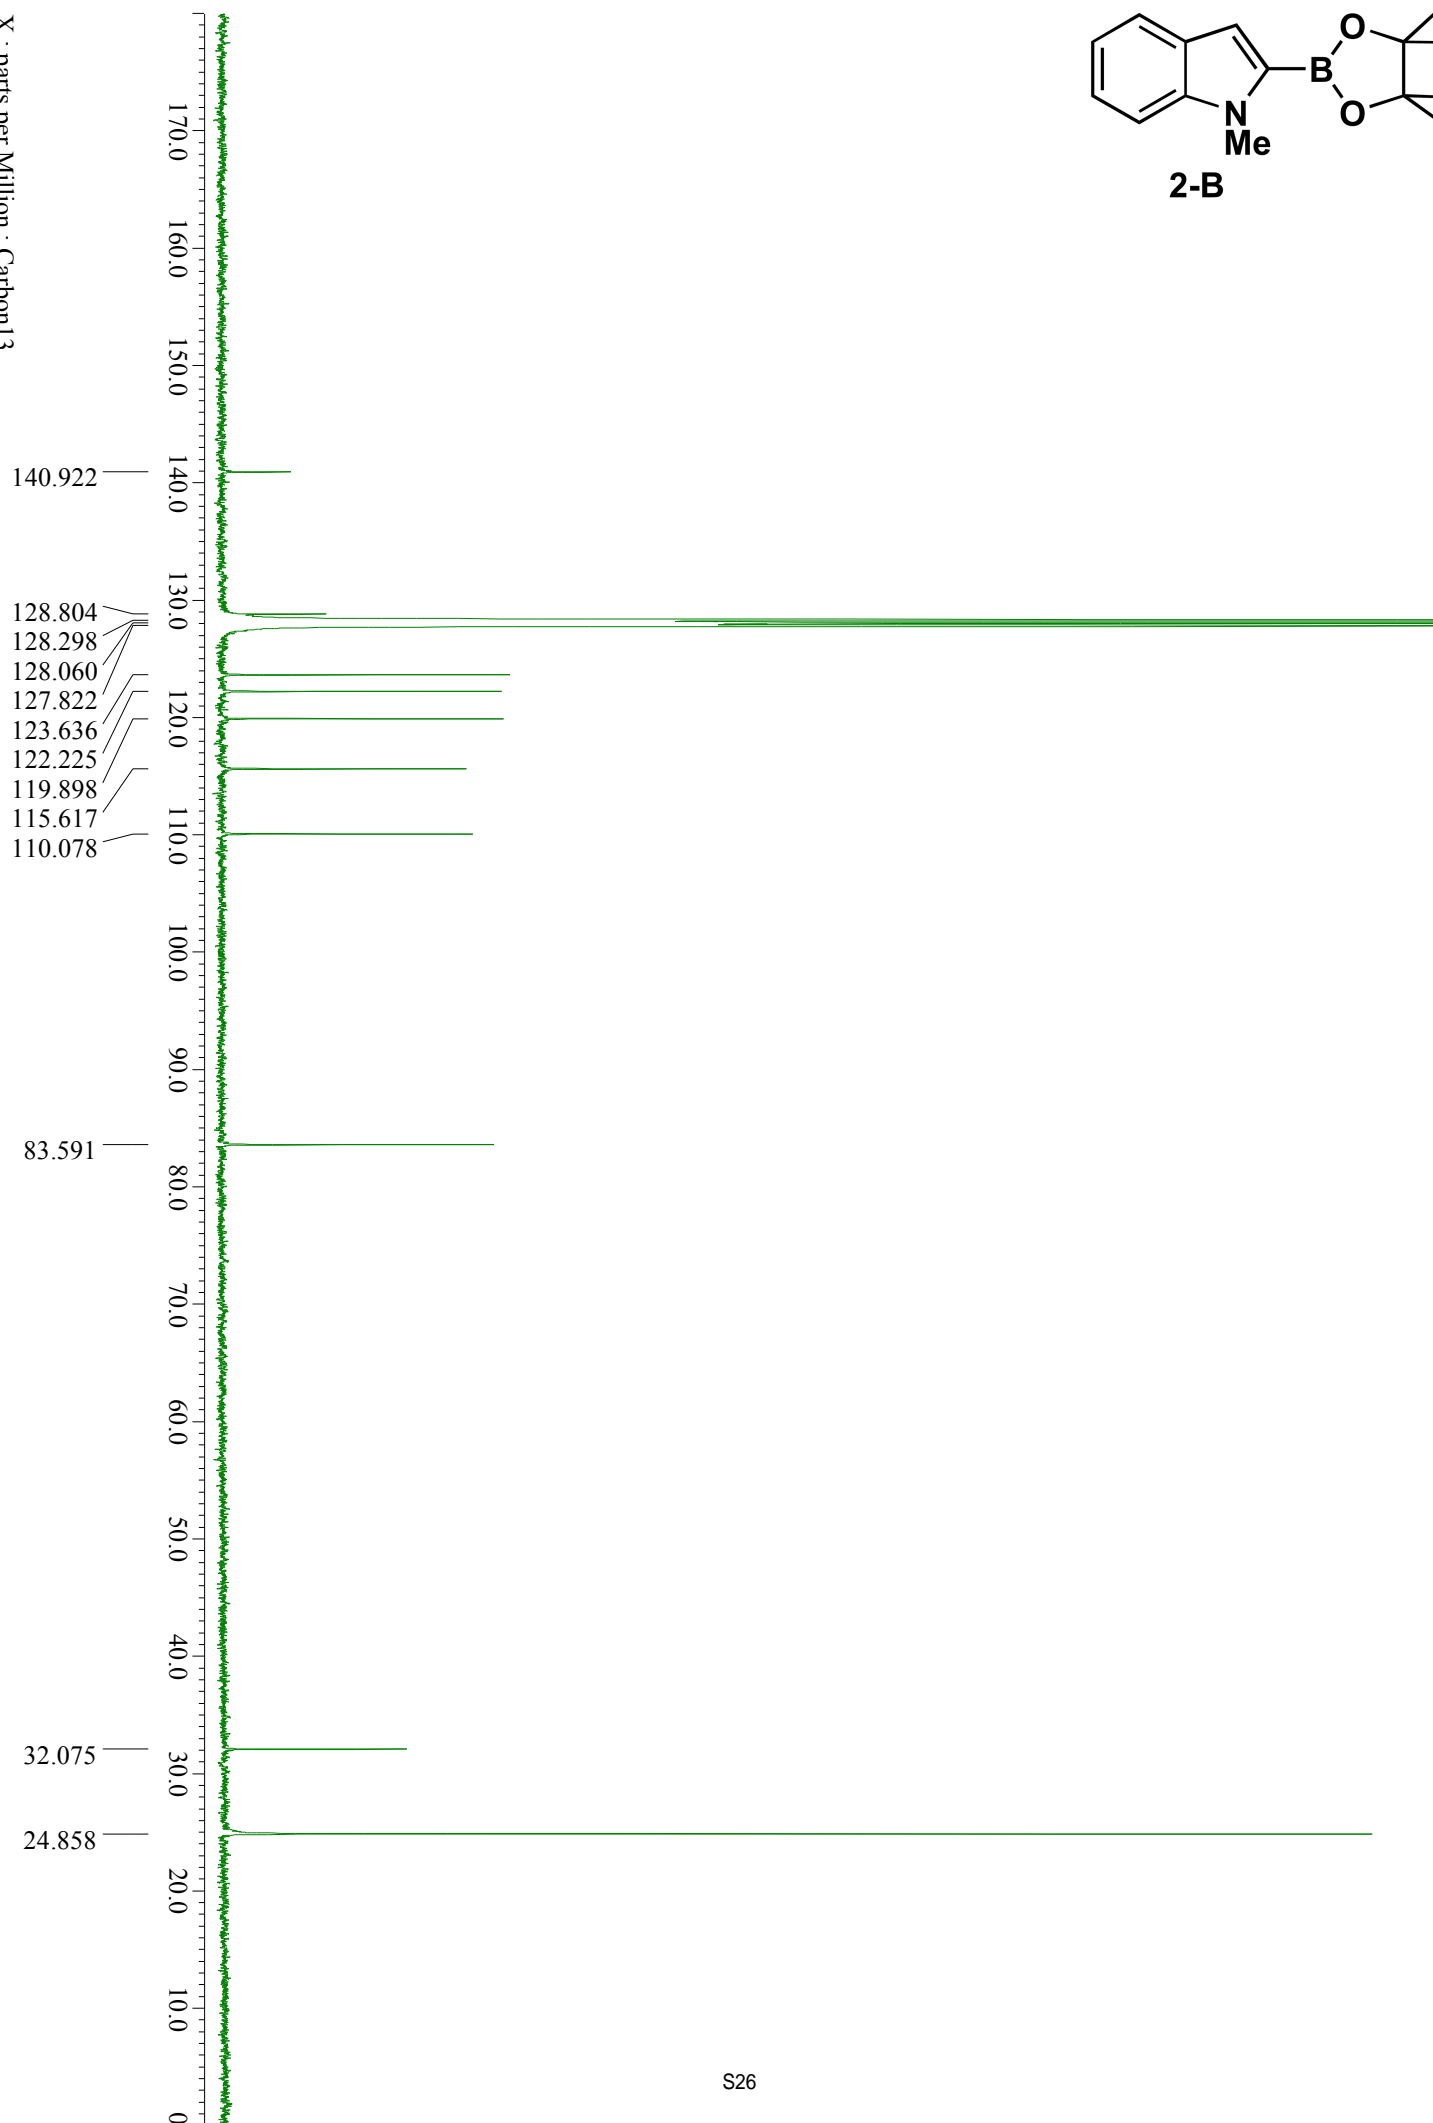

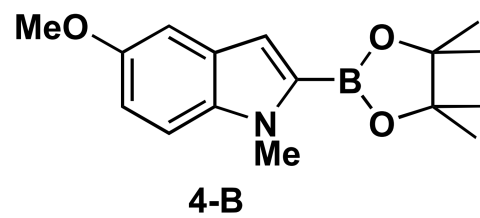

X : parts per Million : Proton

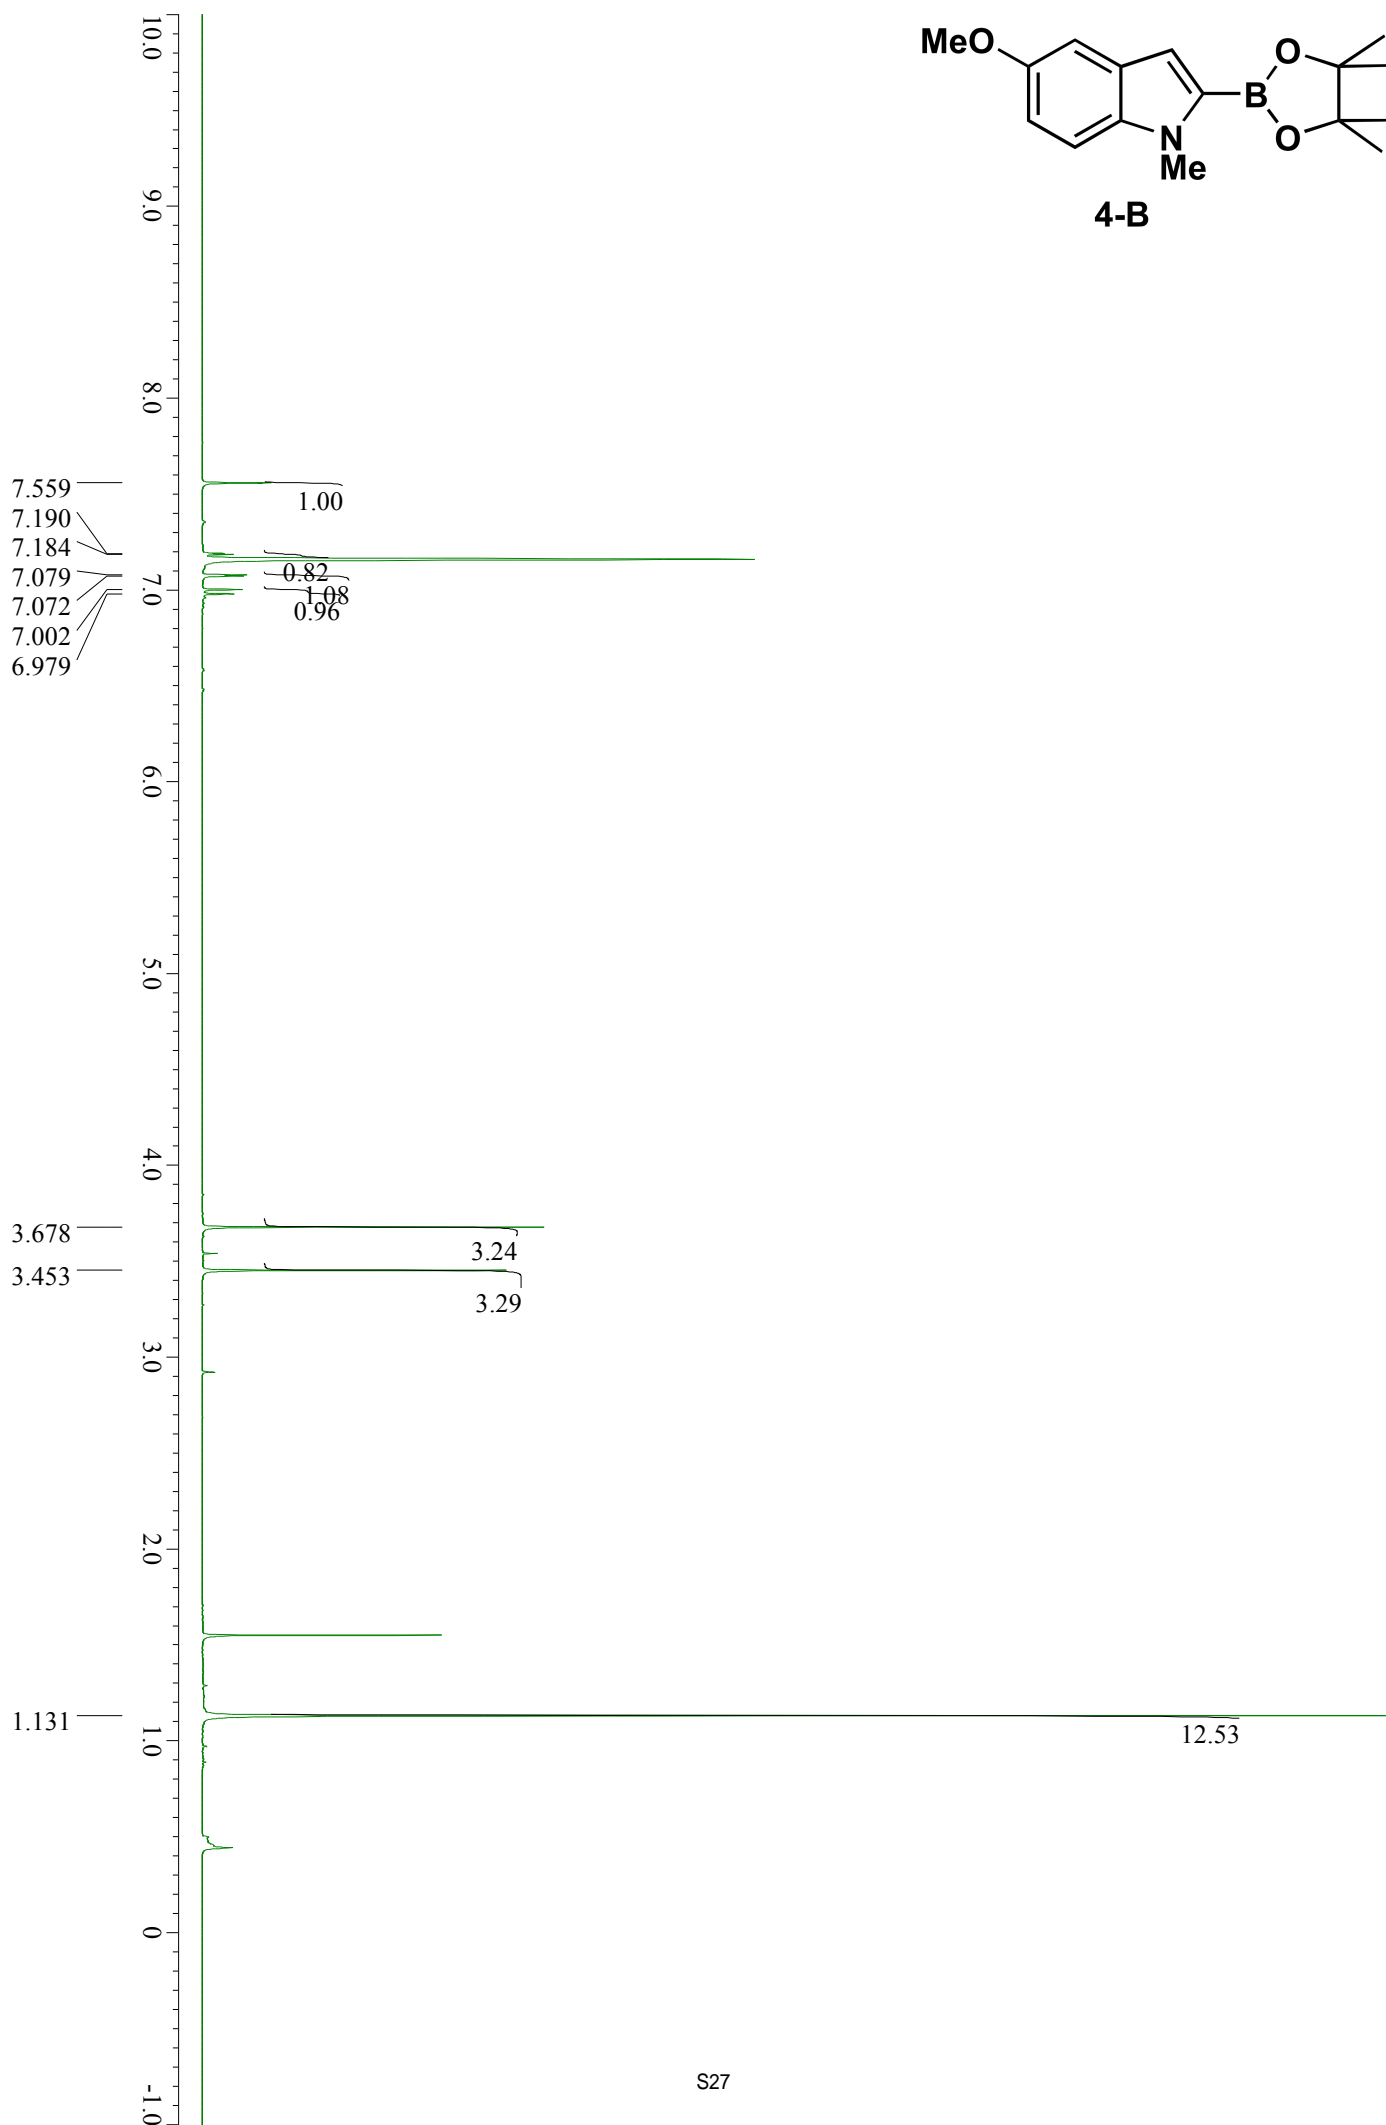

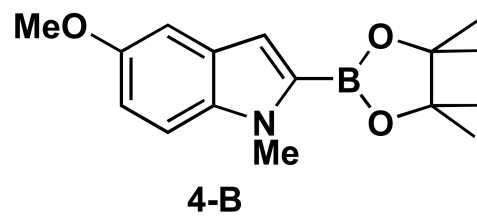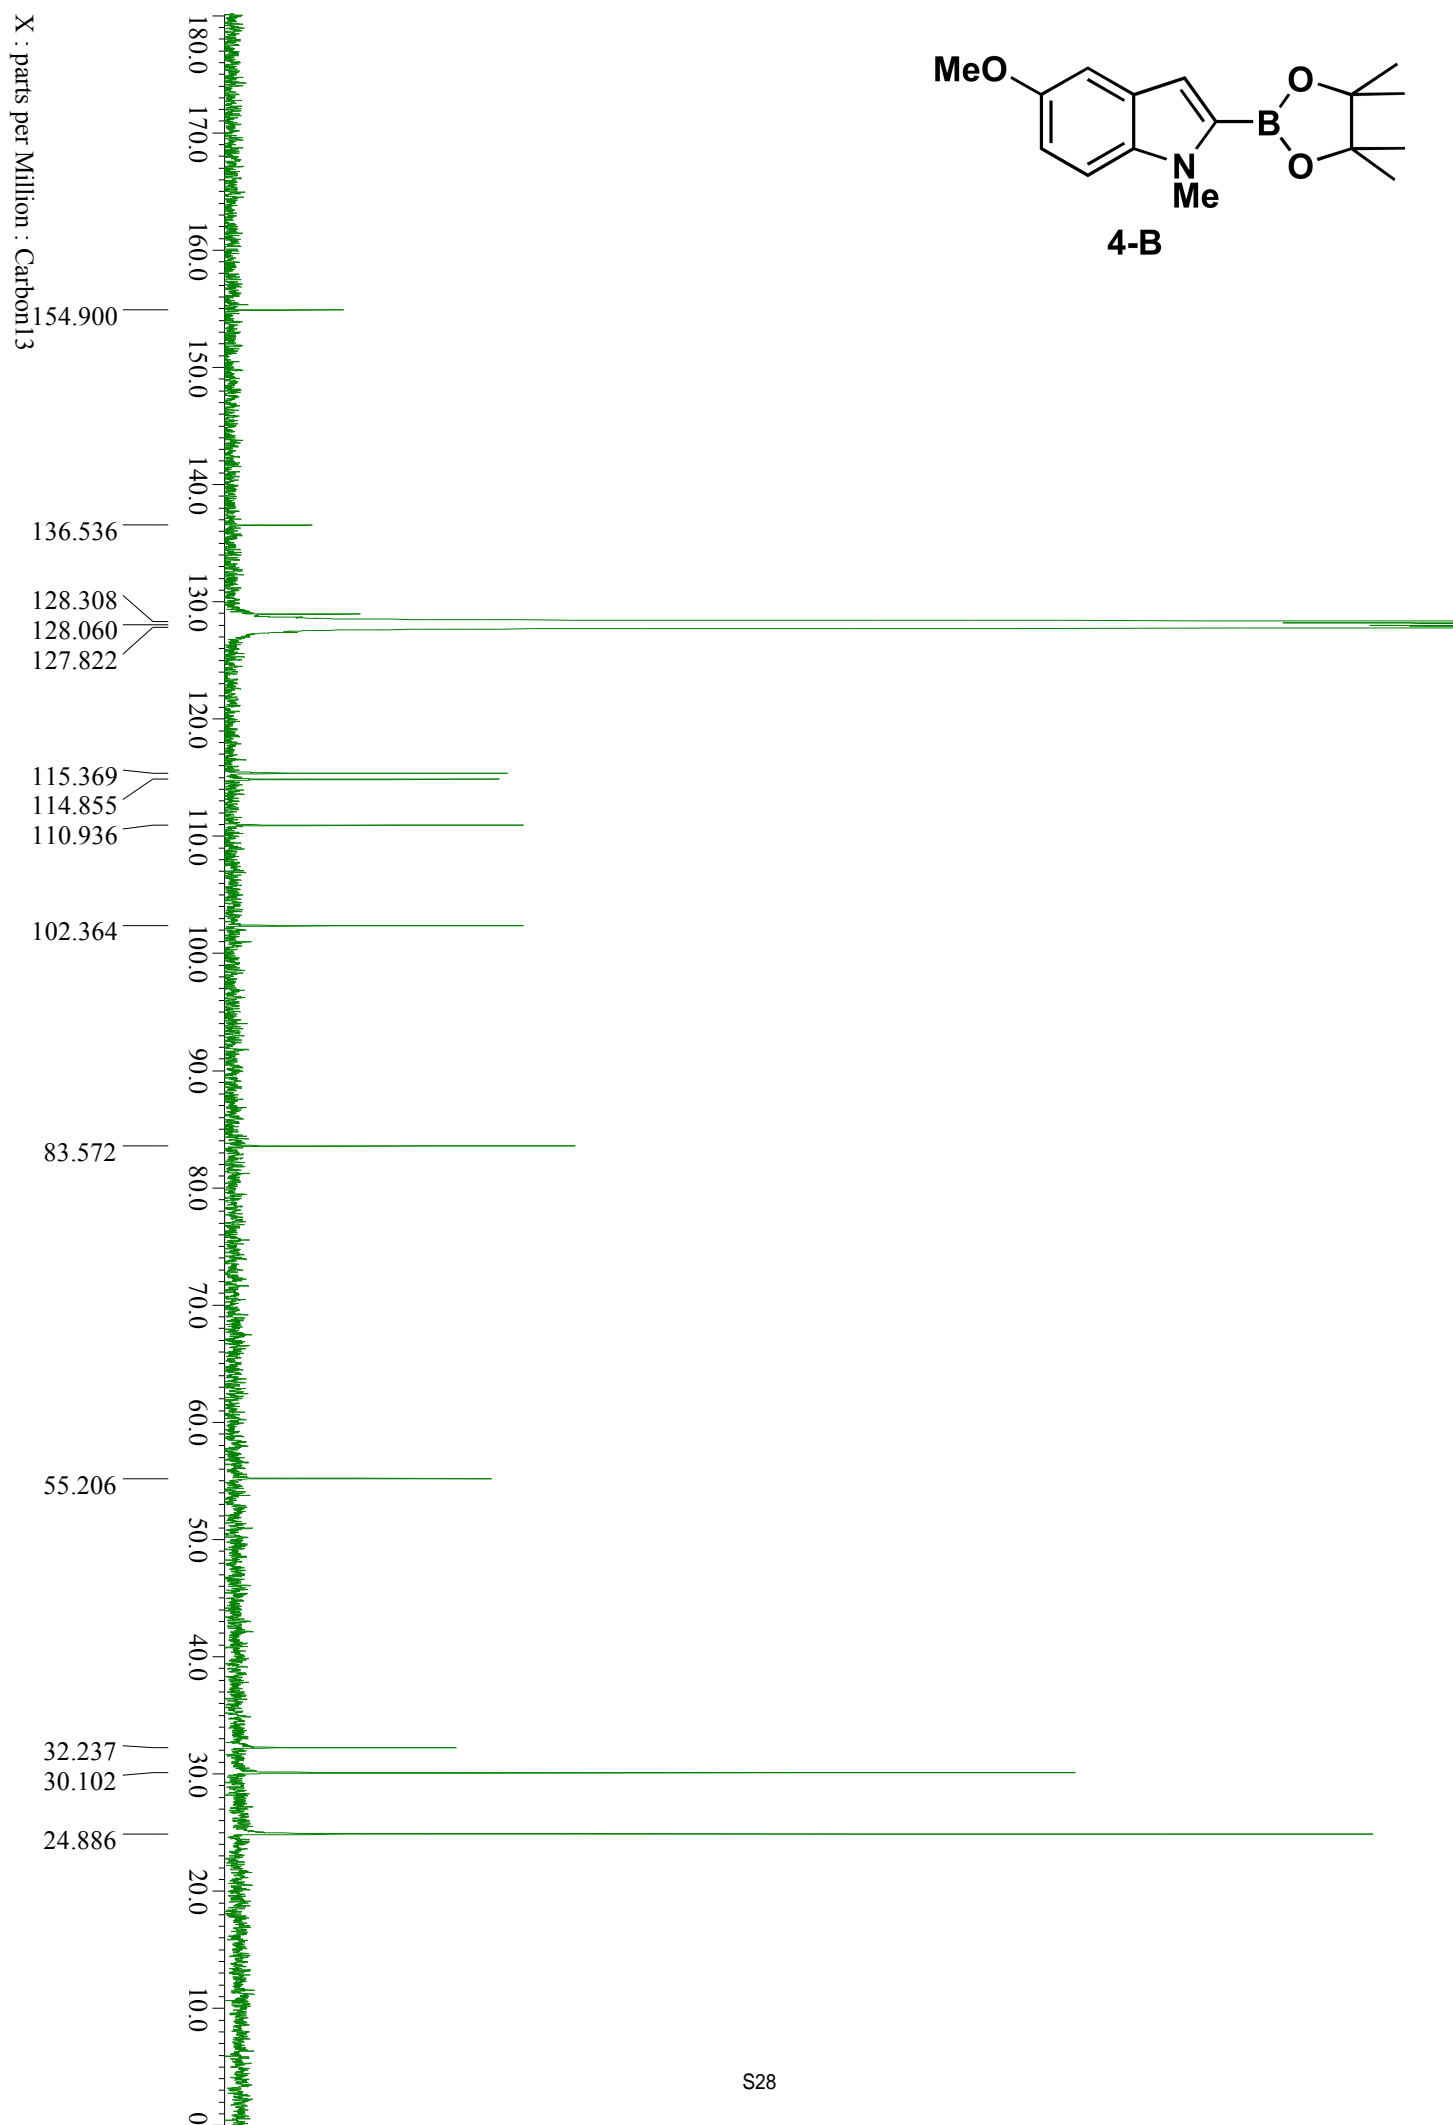

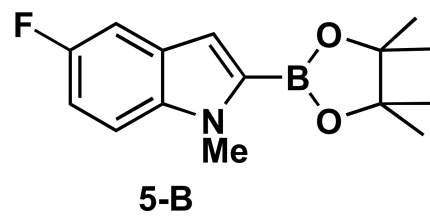

X : parts per Million : Proton

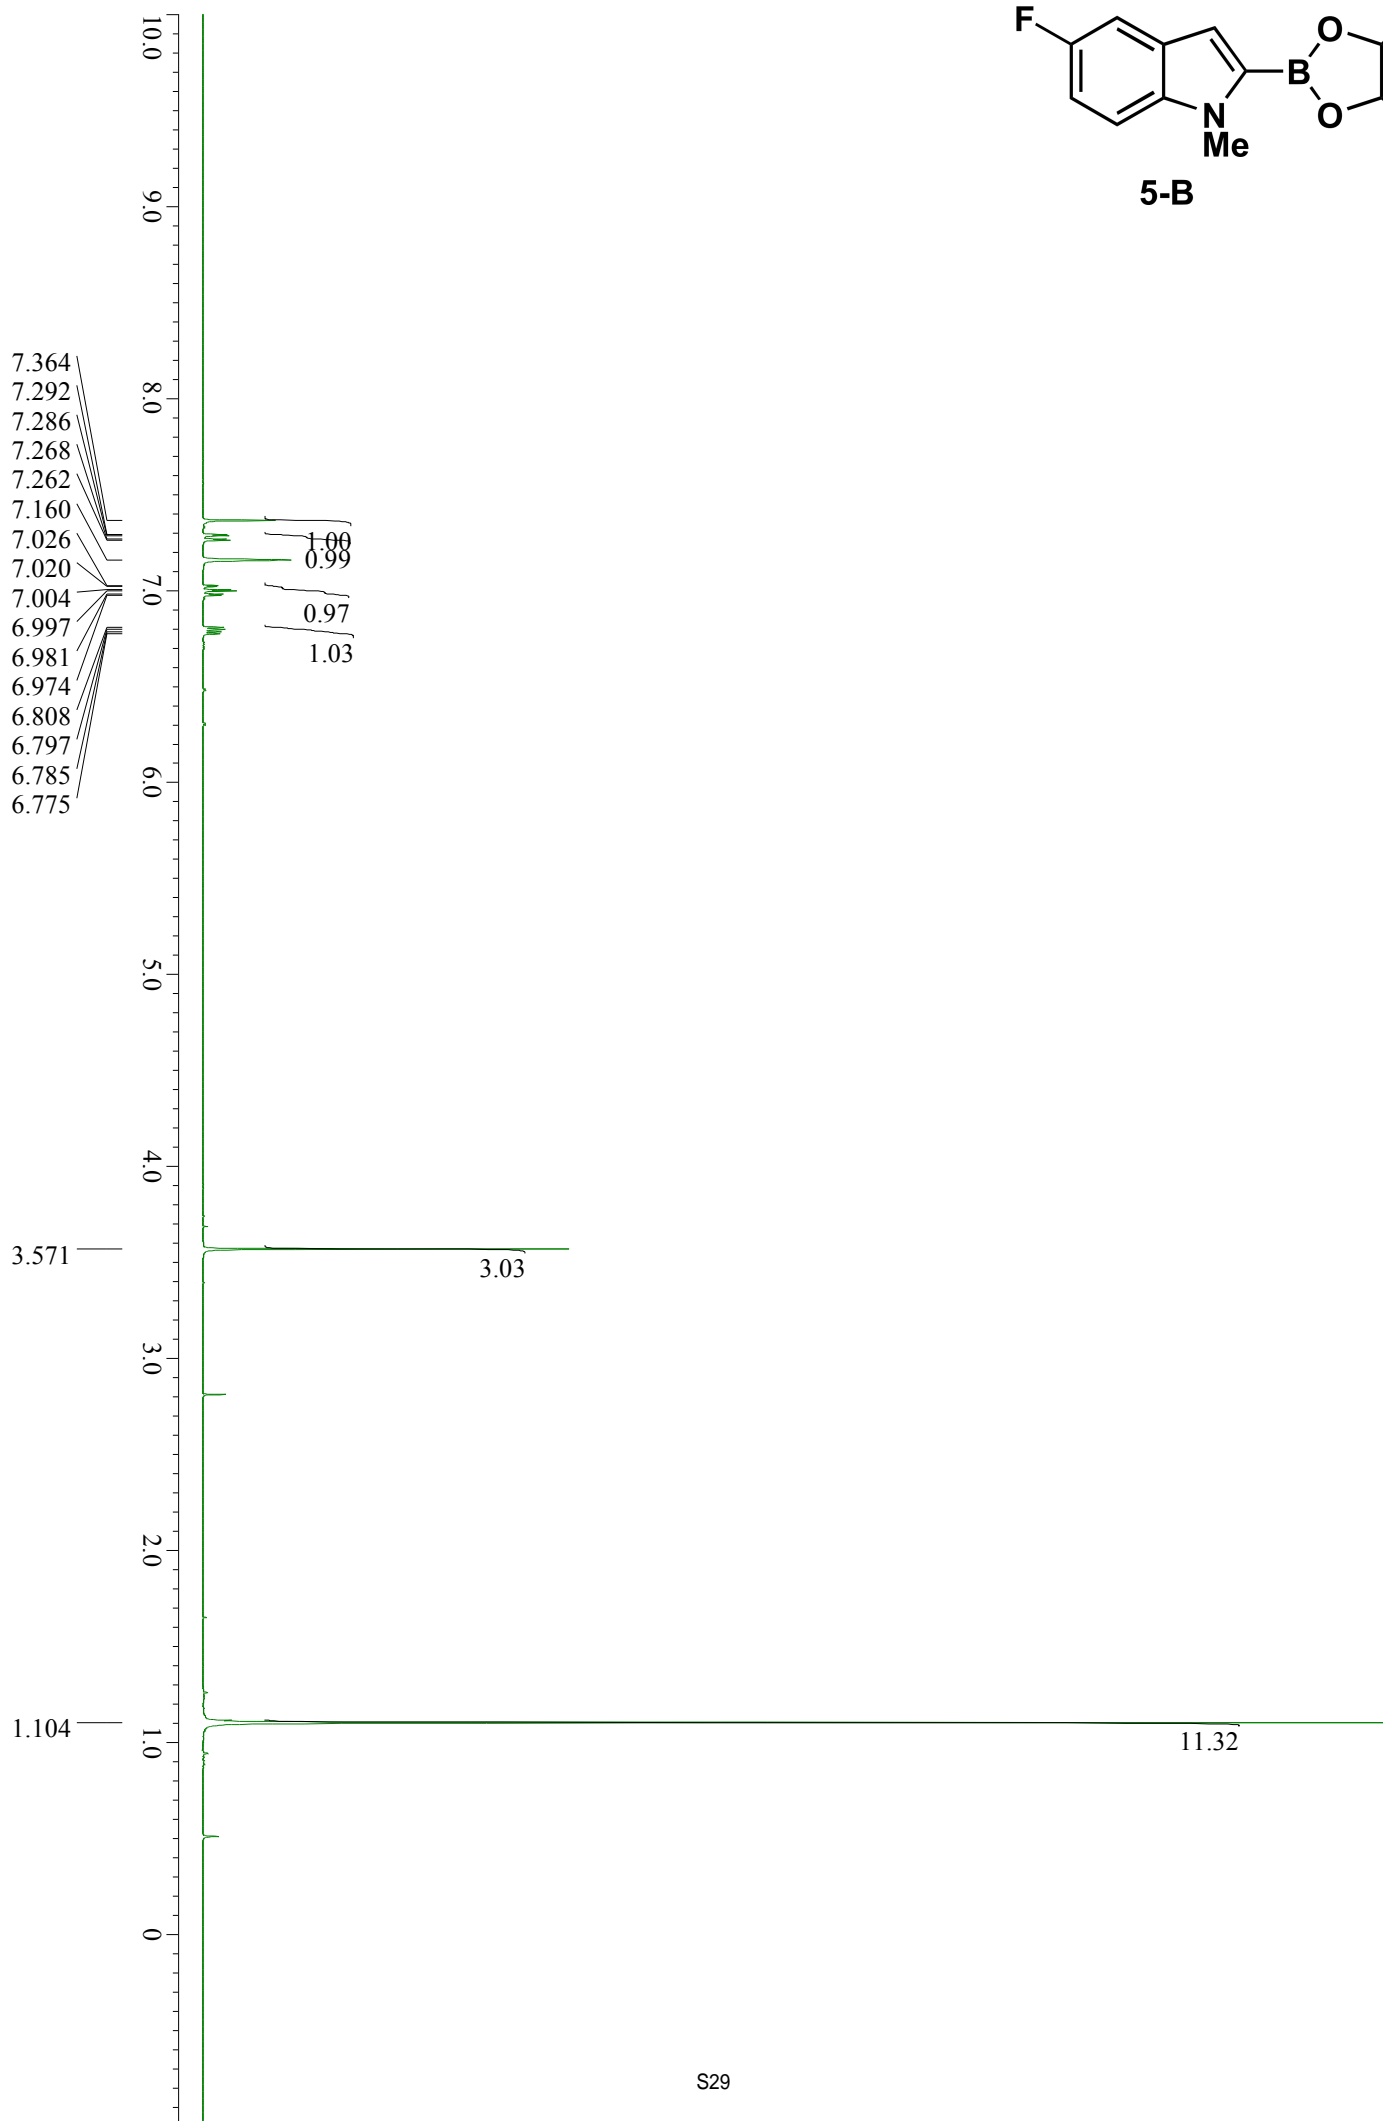

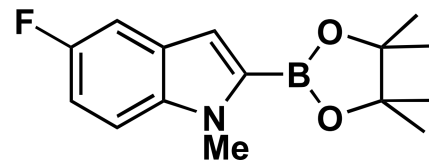

5-B

X : parts per Million : Carbon13

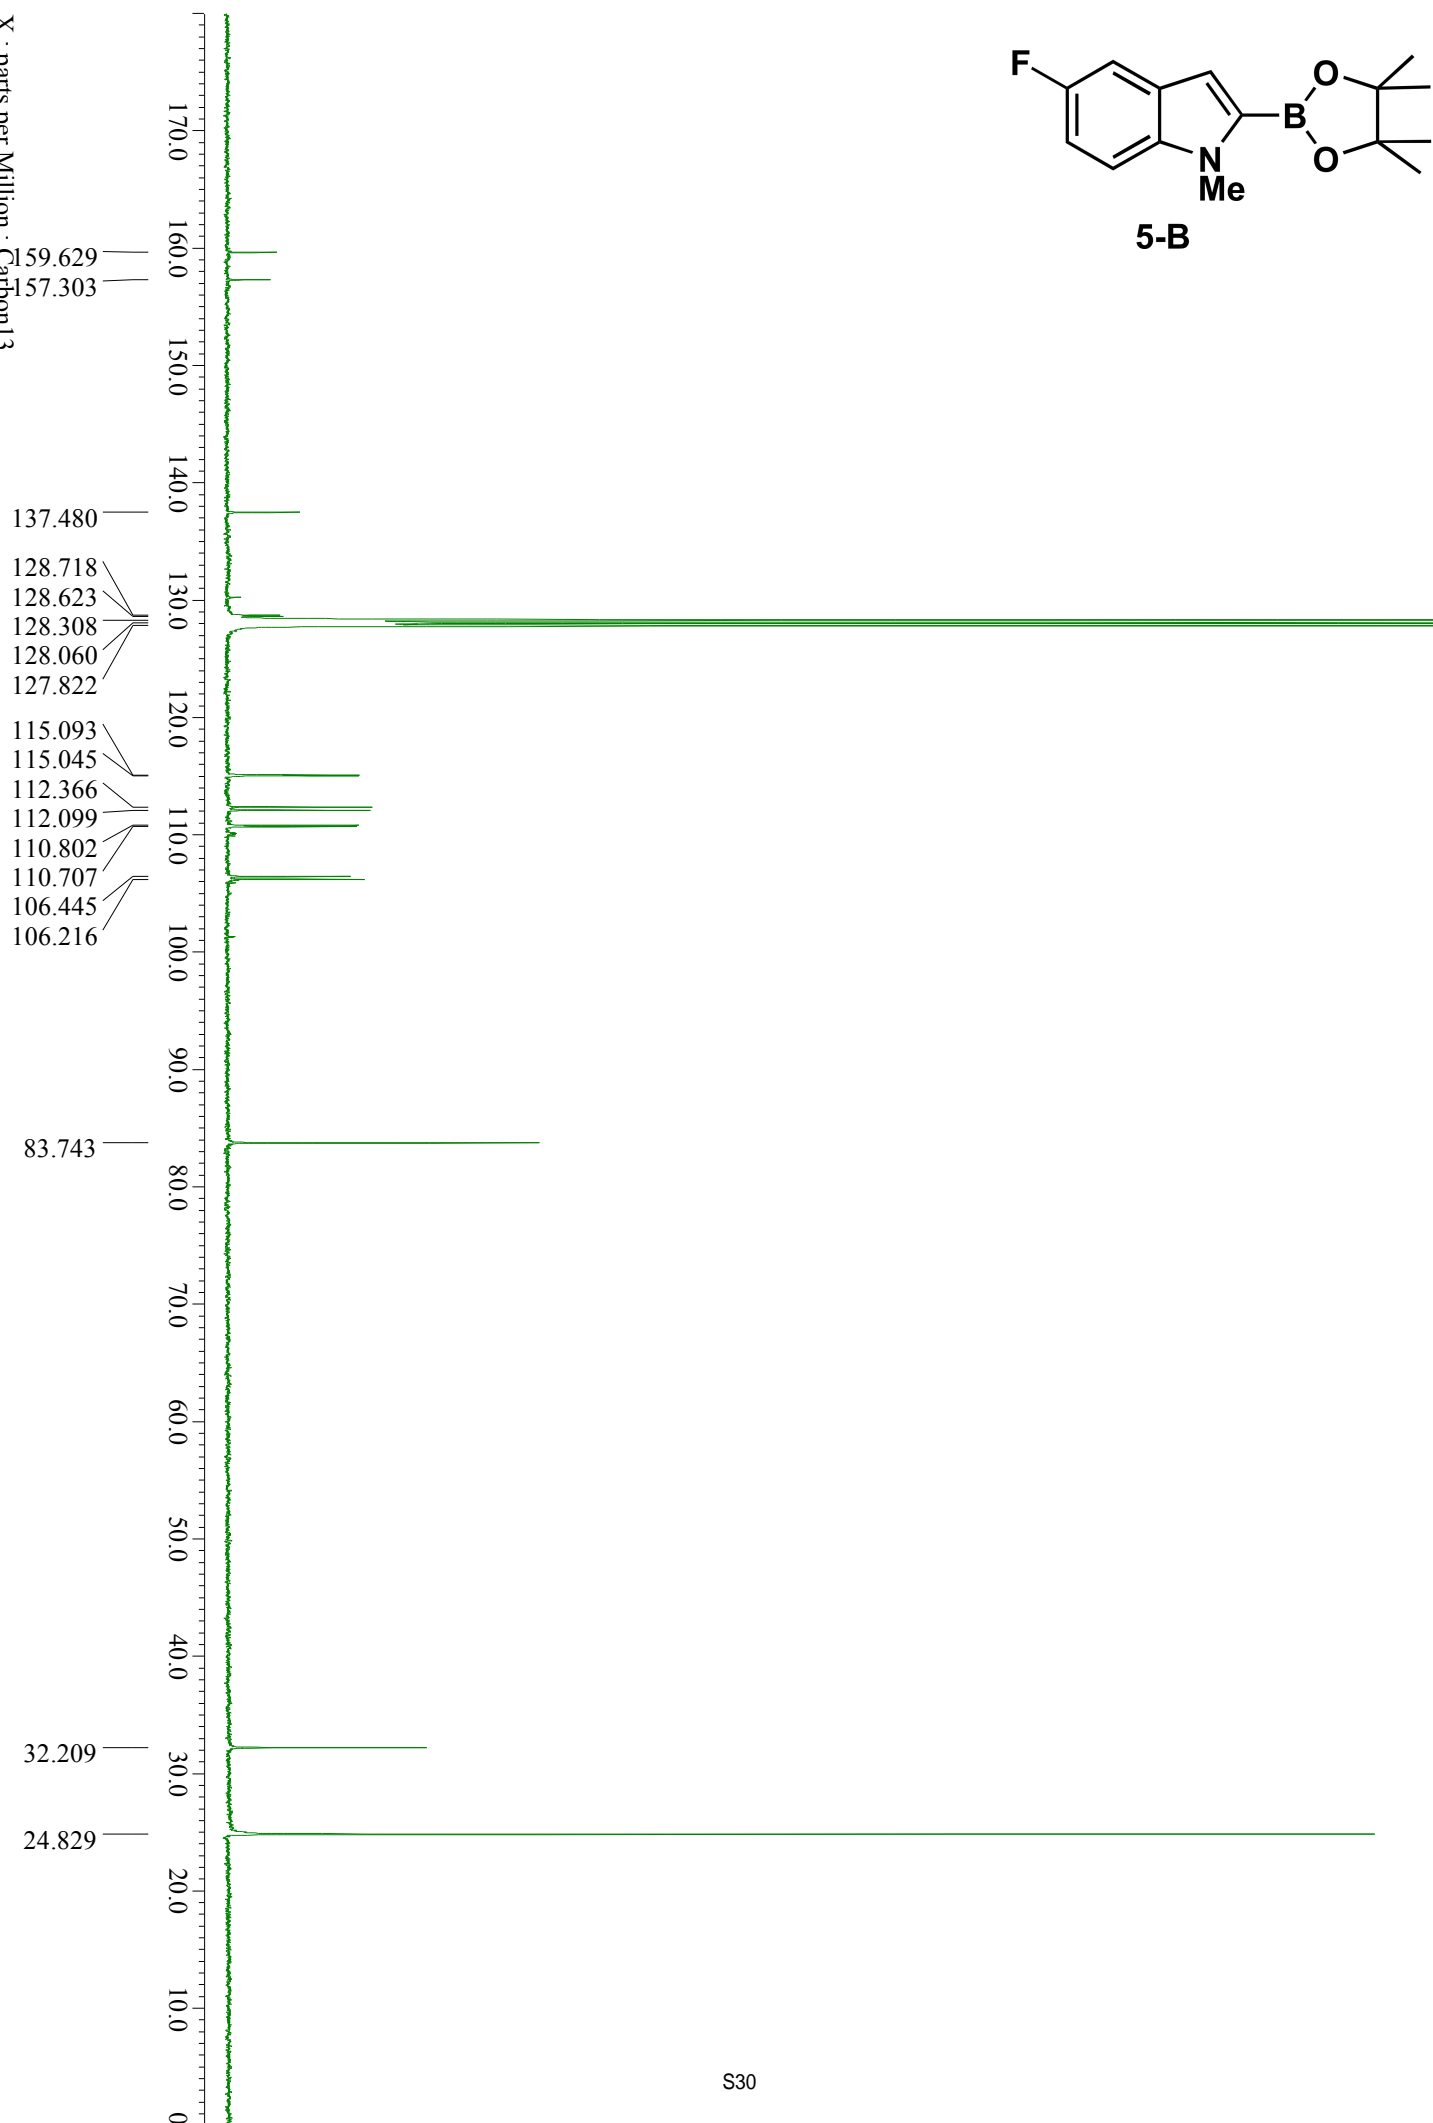

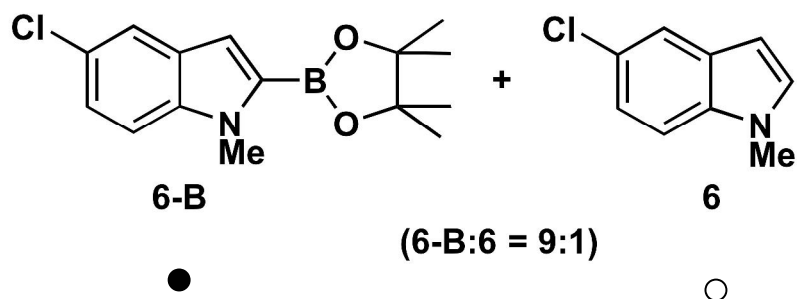

X : parts per Million : Proton

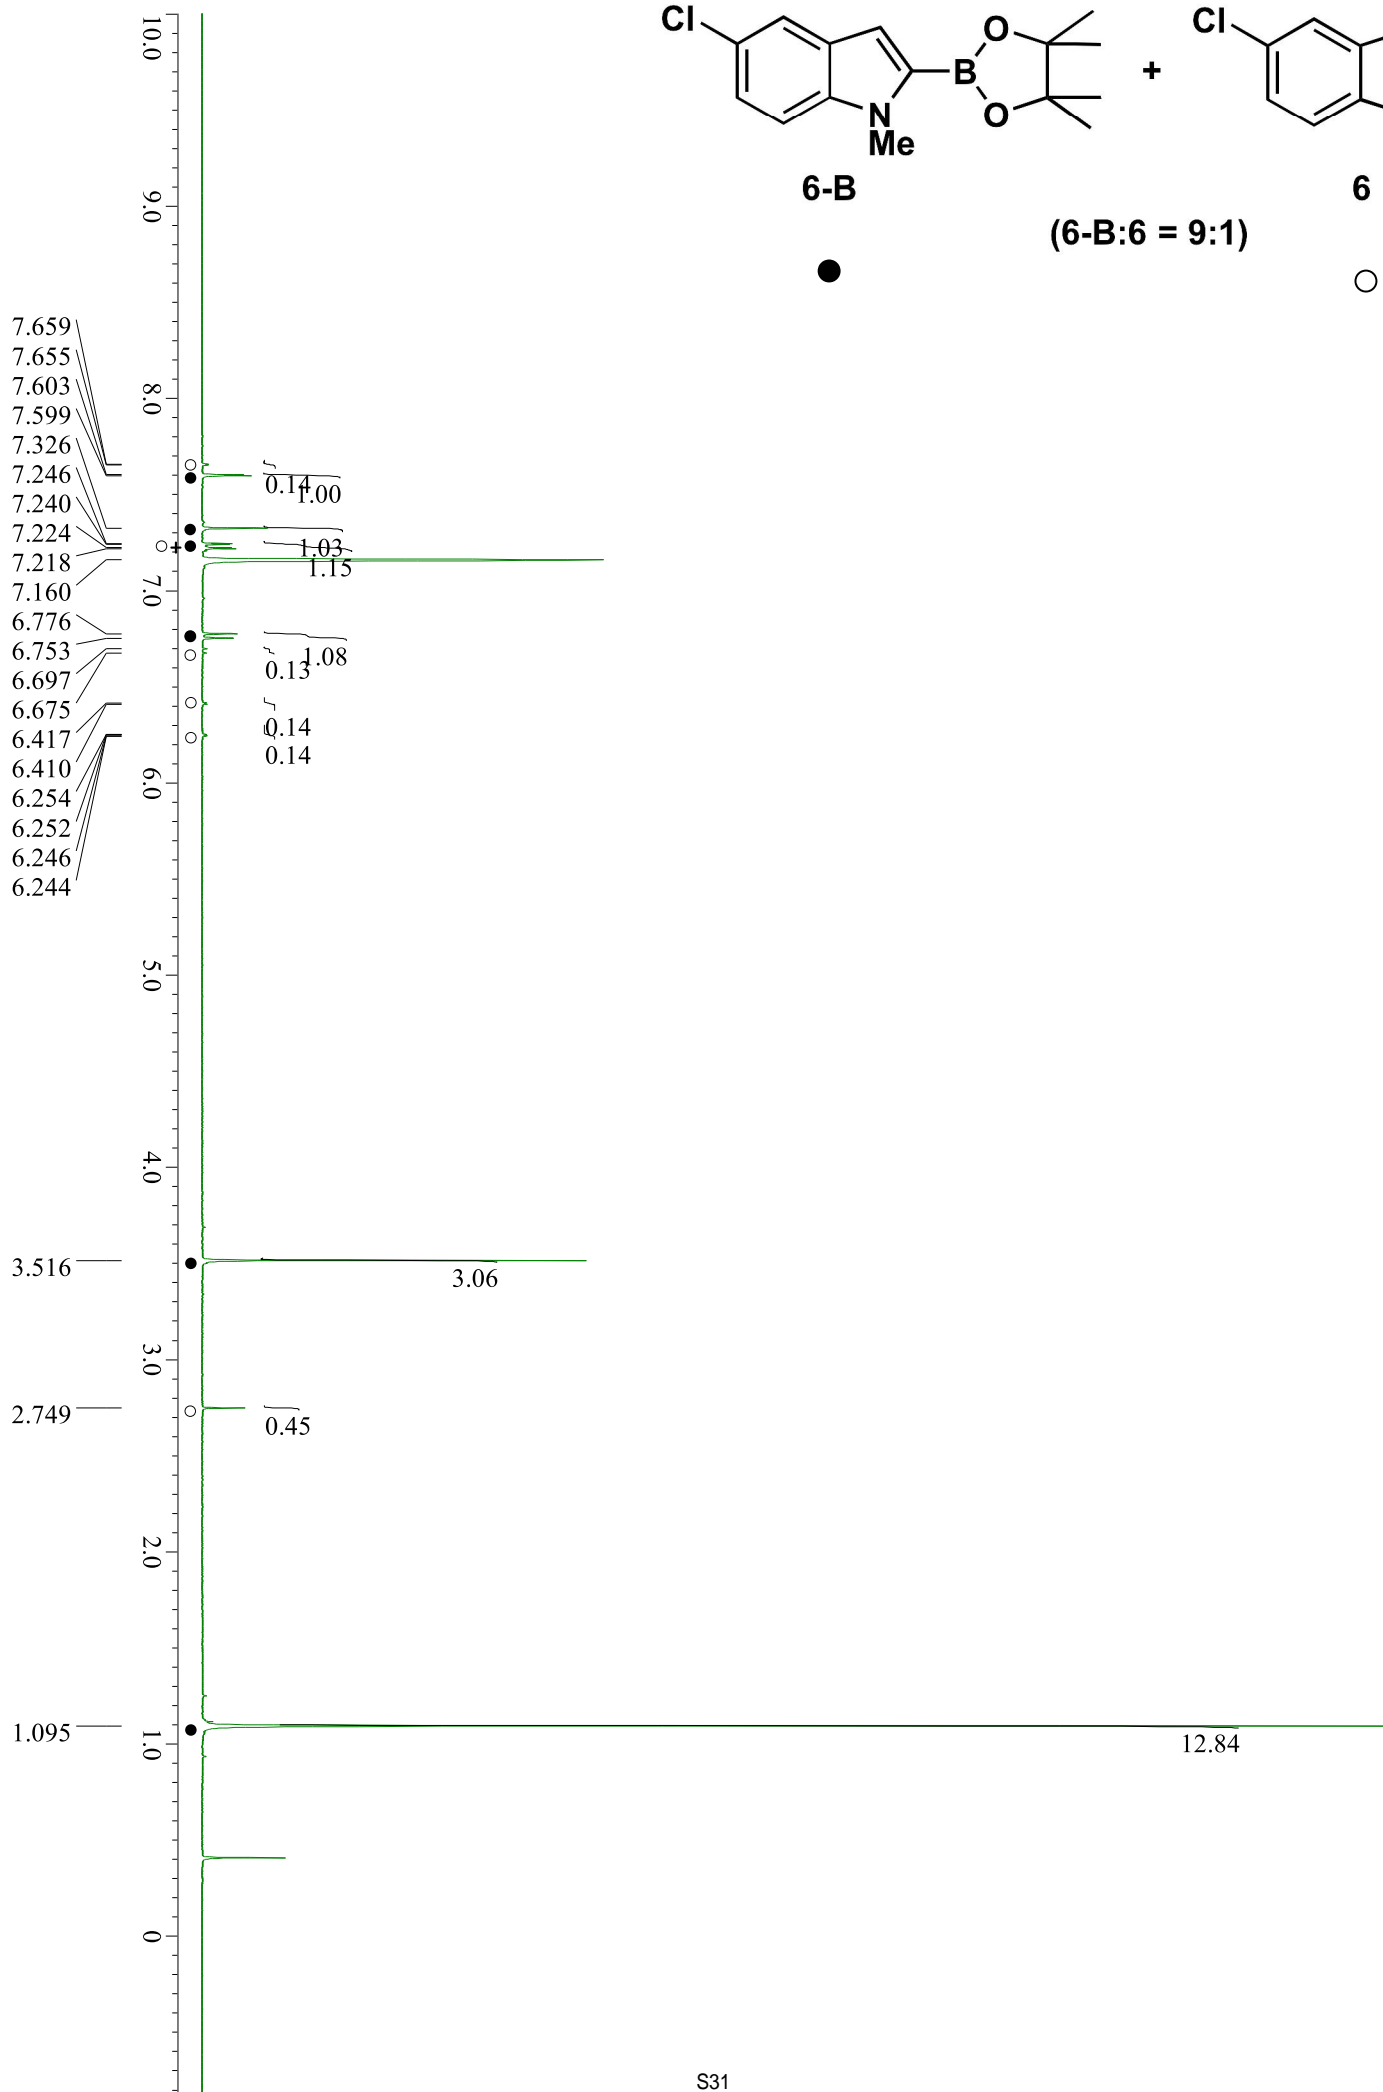

X : parts per Million : Carbon13

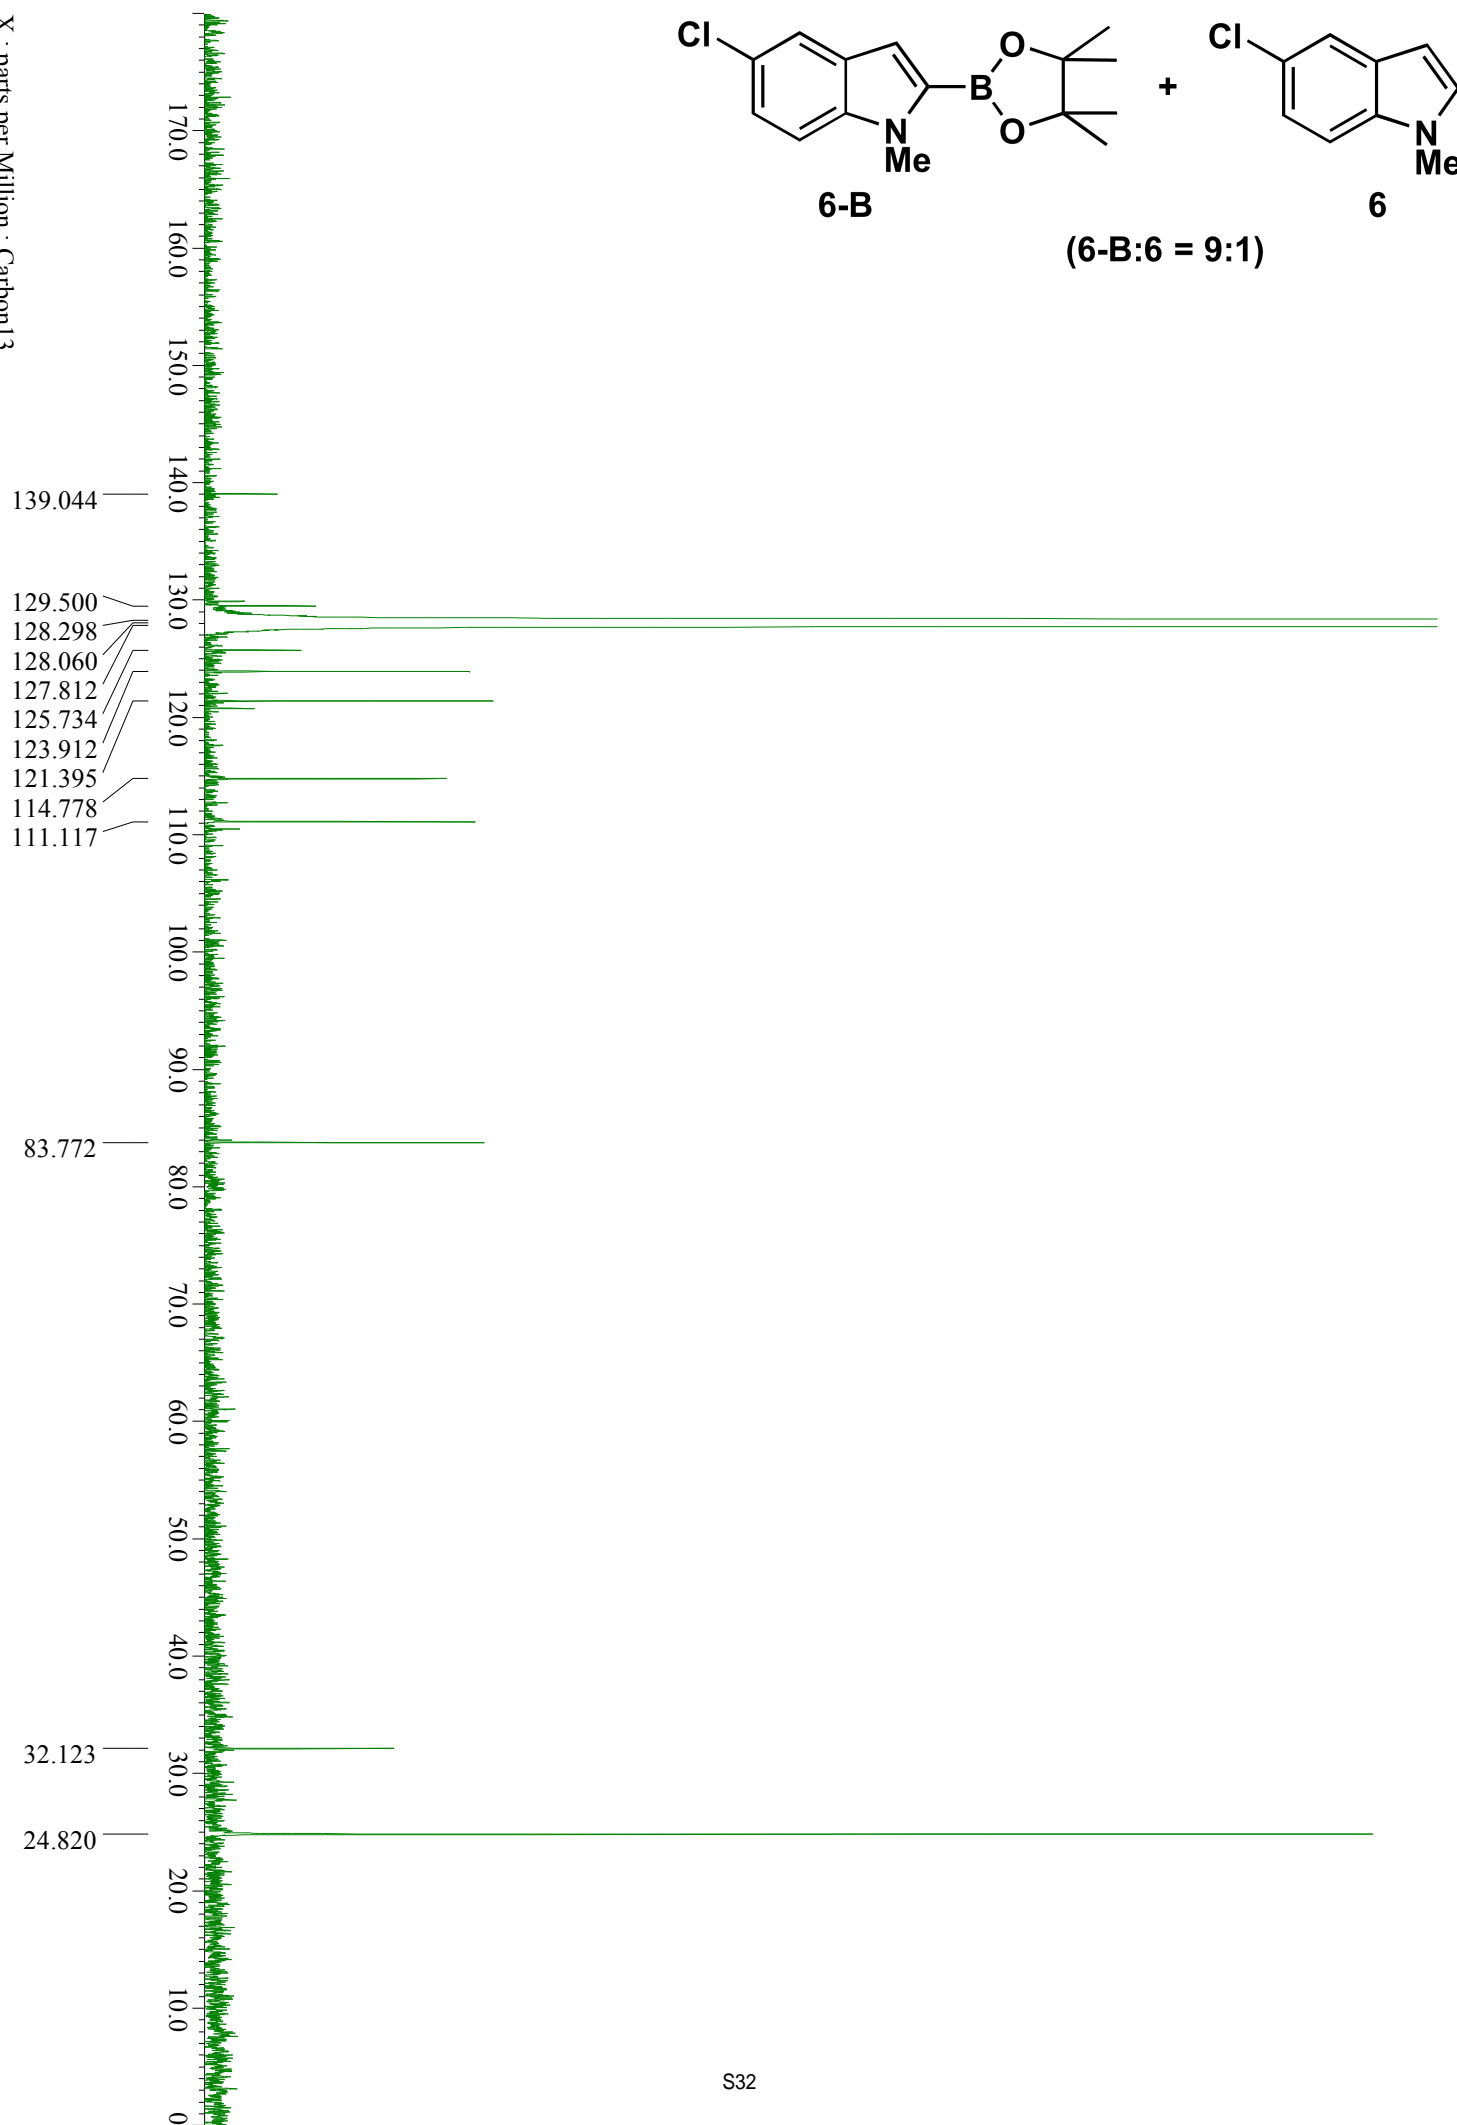



X : parts per Million : Proton

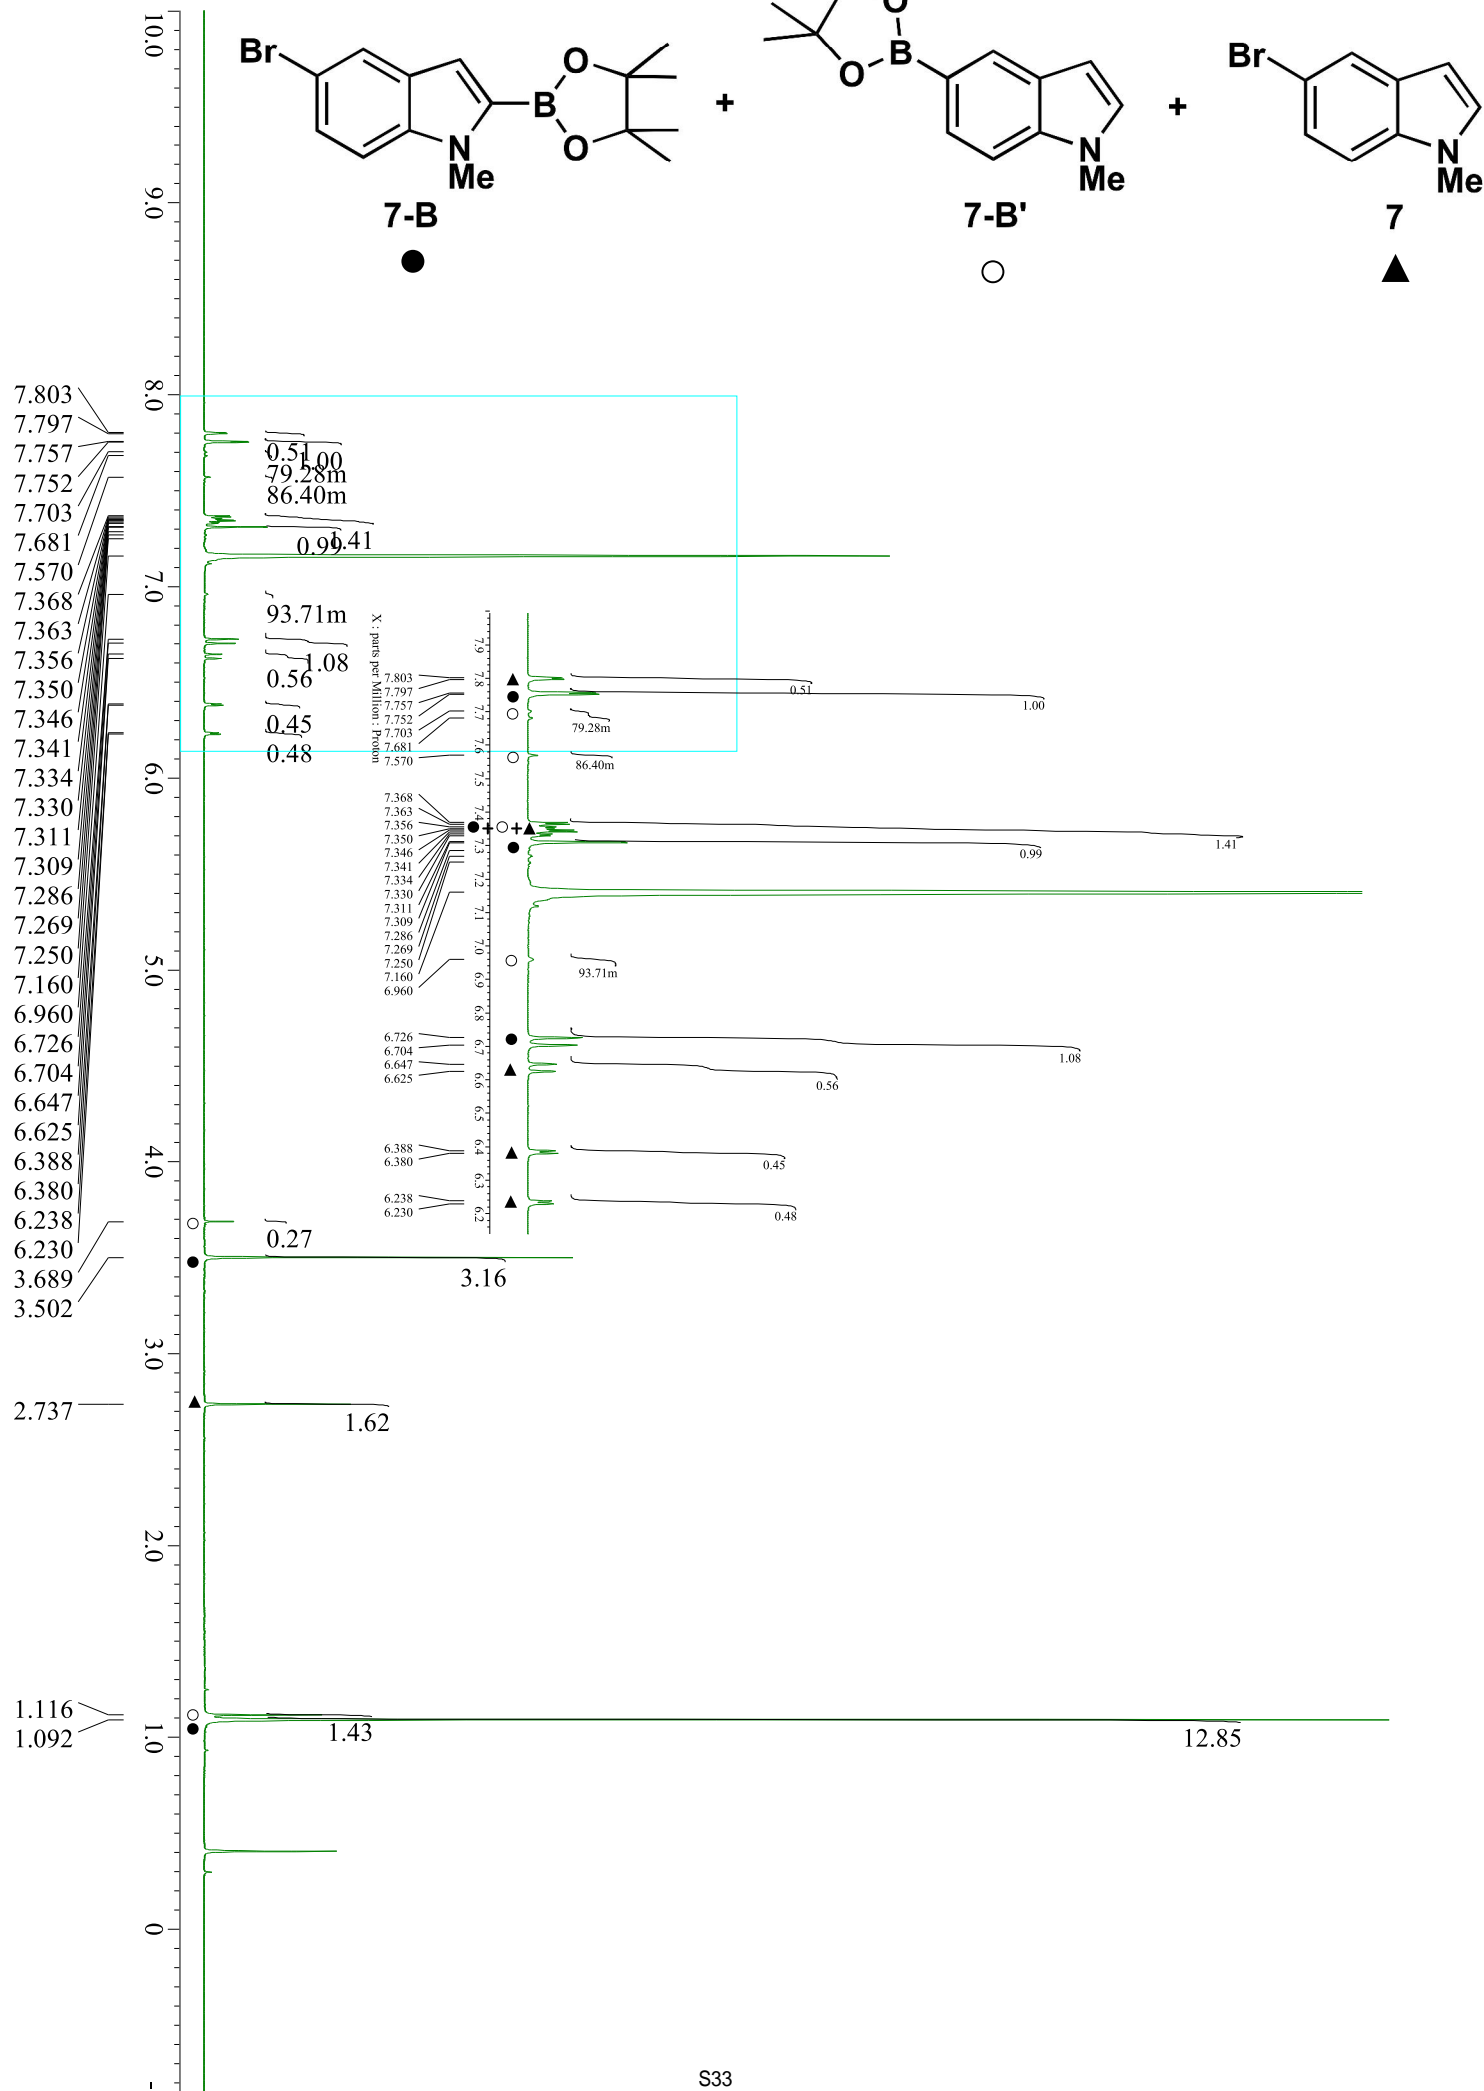

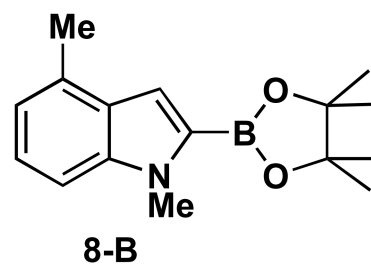

X : parts per Million : Proton

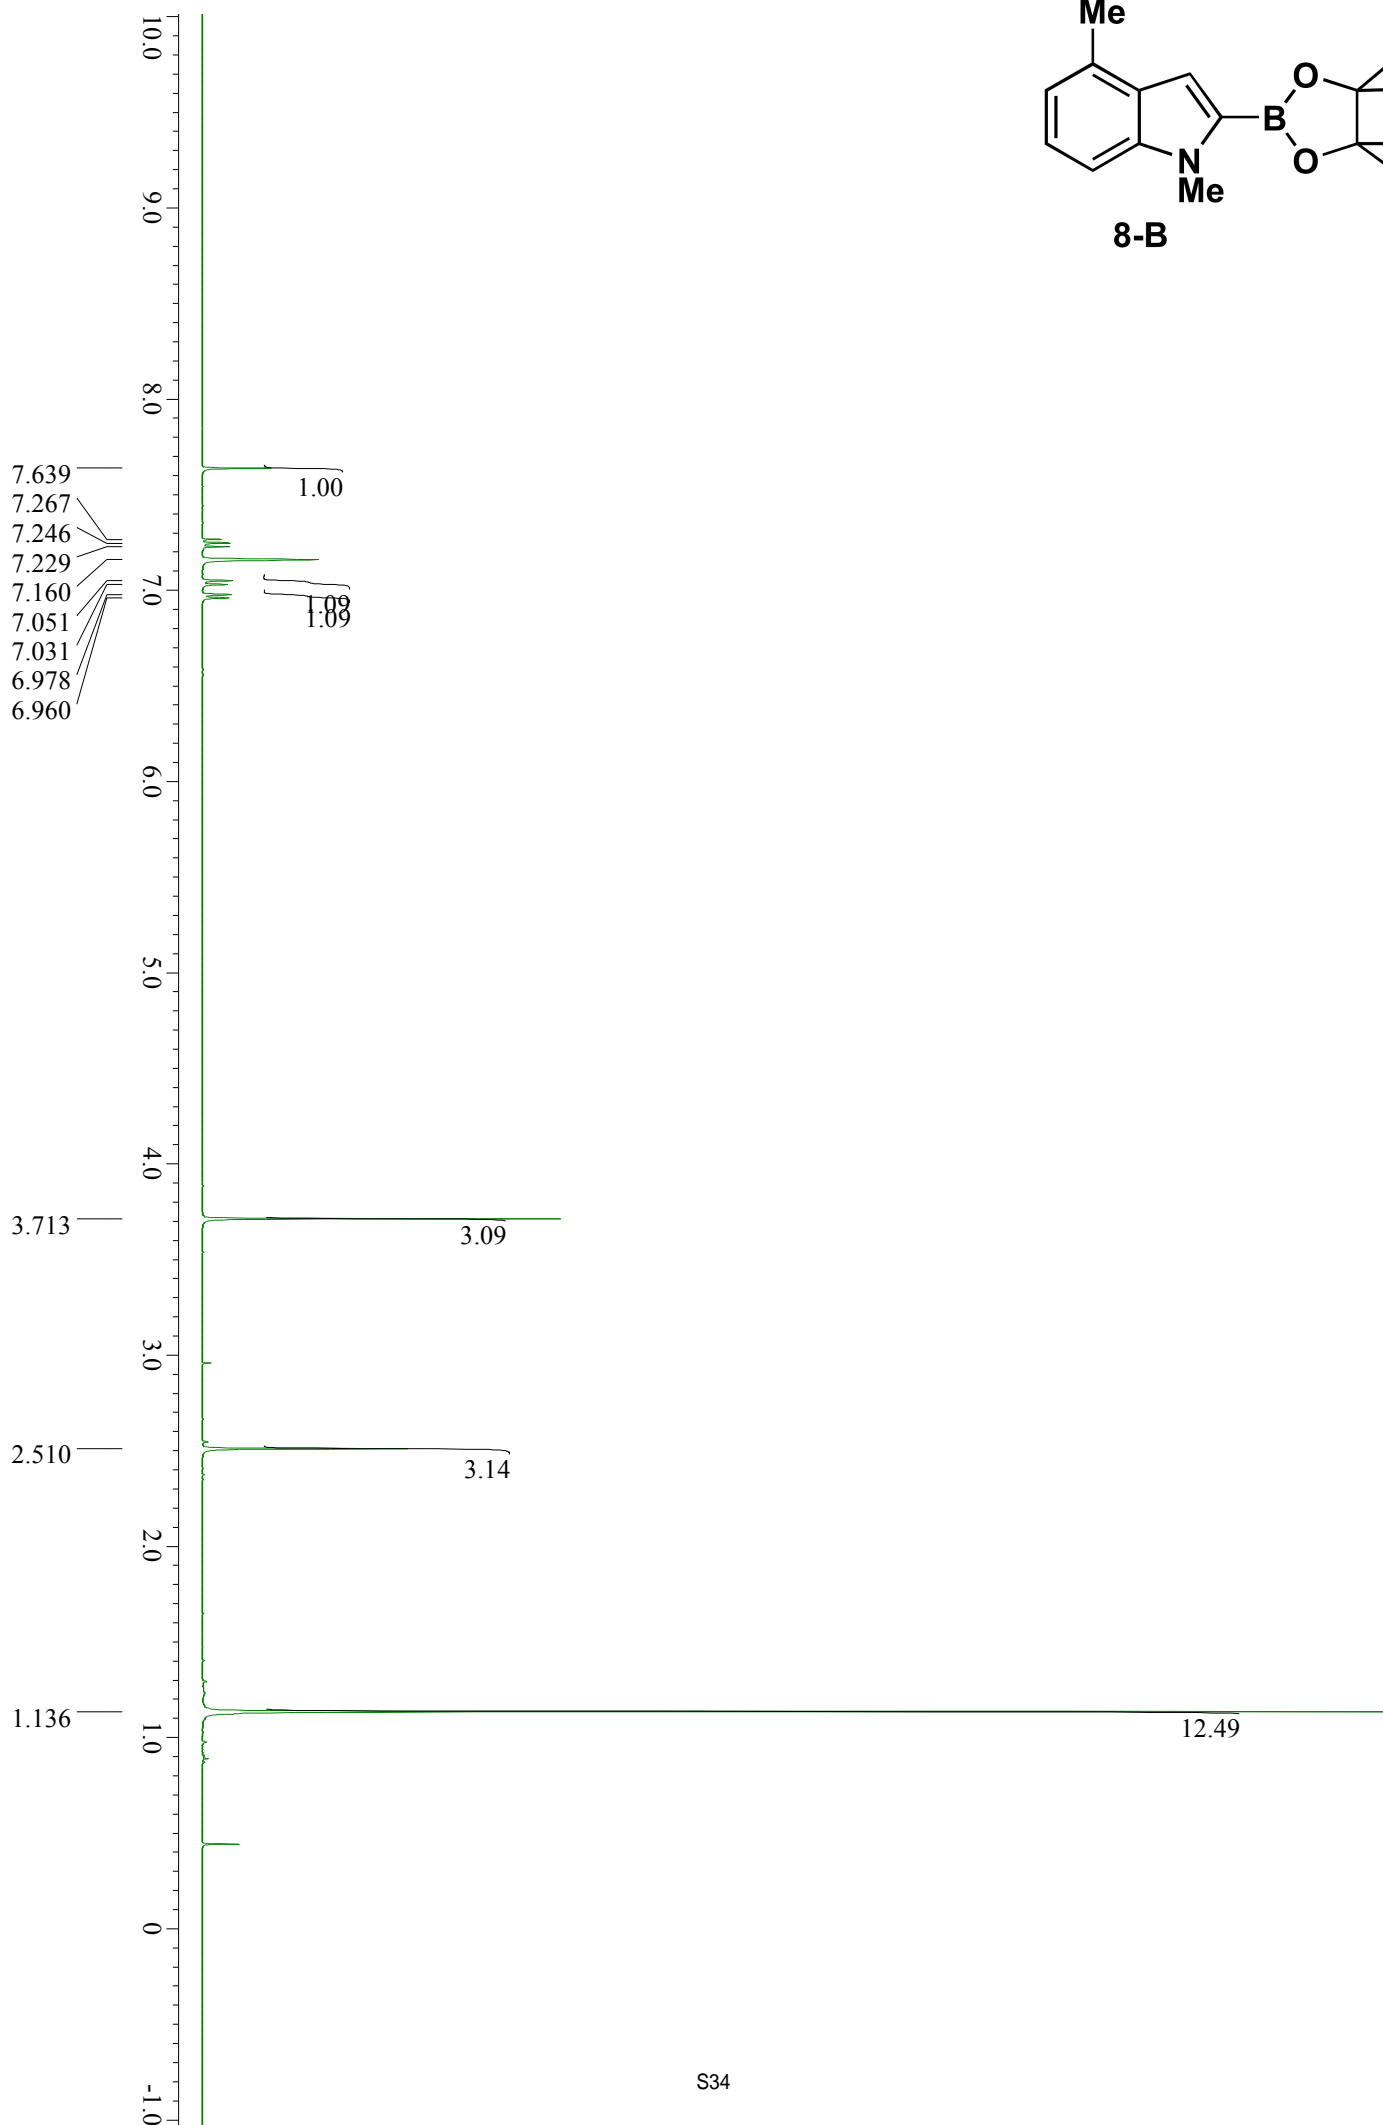

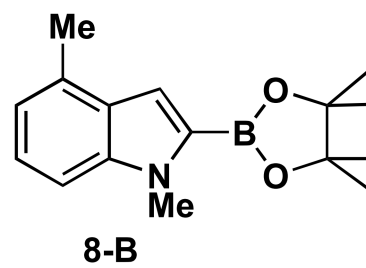

X : parts per Million : Carbon13

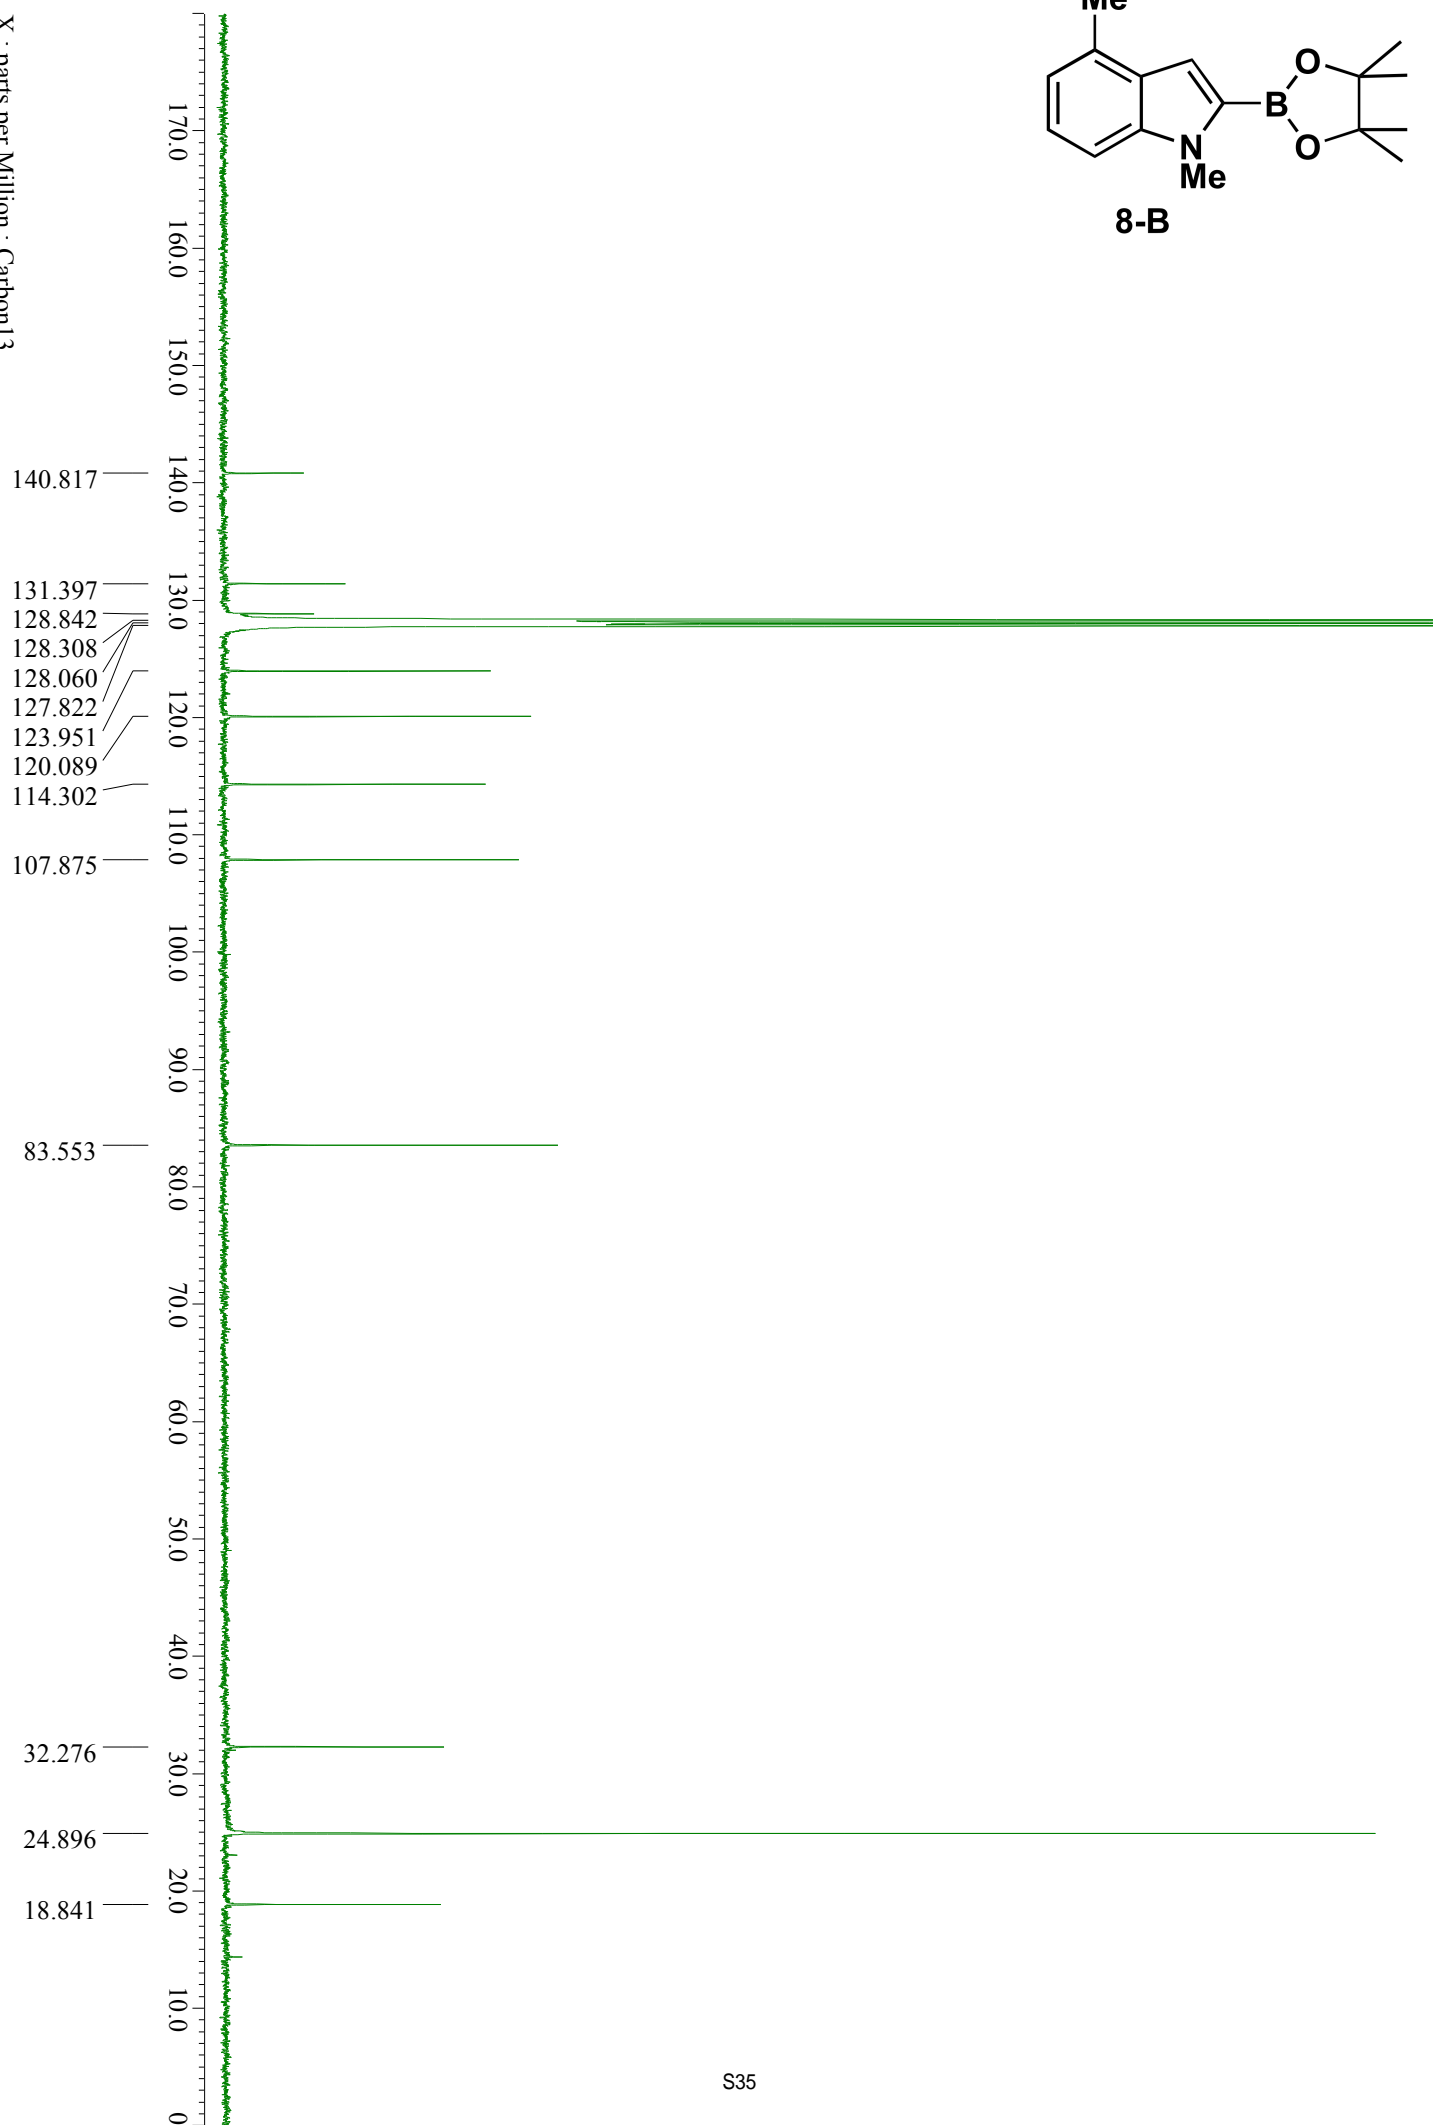

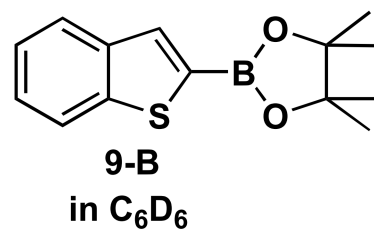

X : parts per Million : Proton

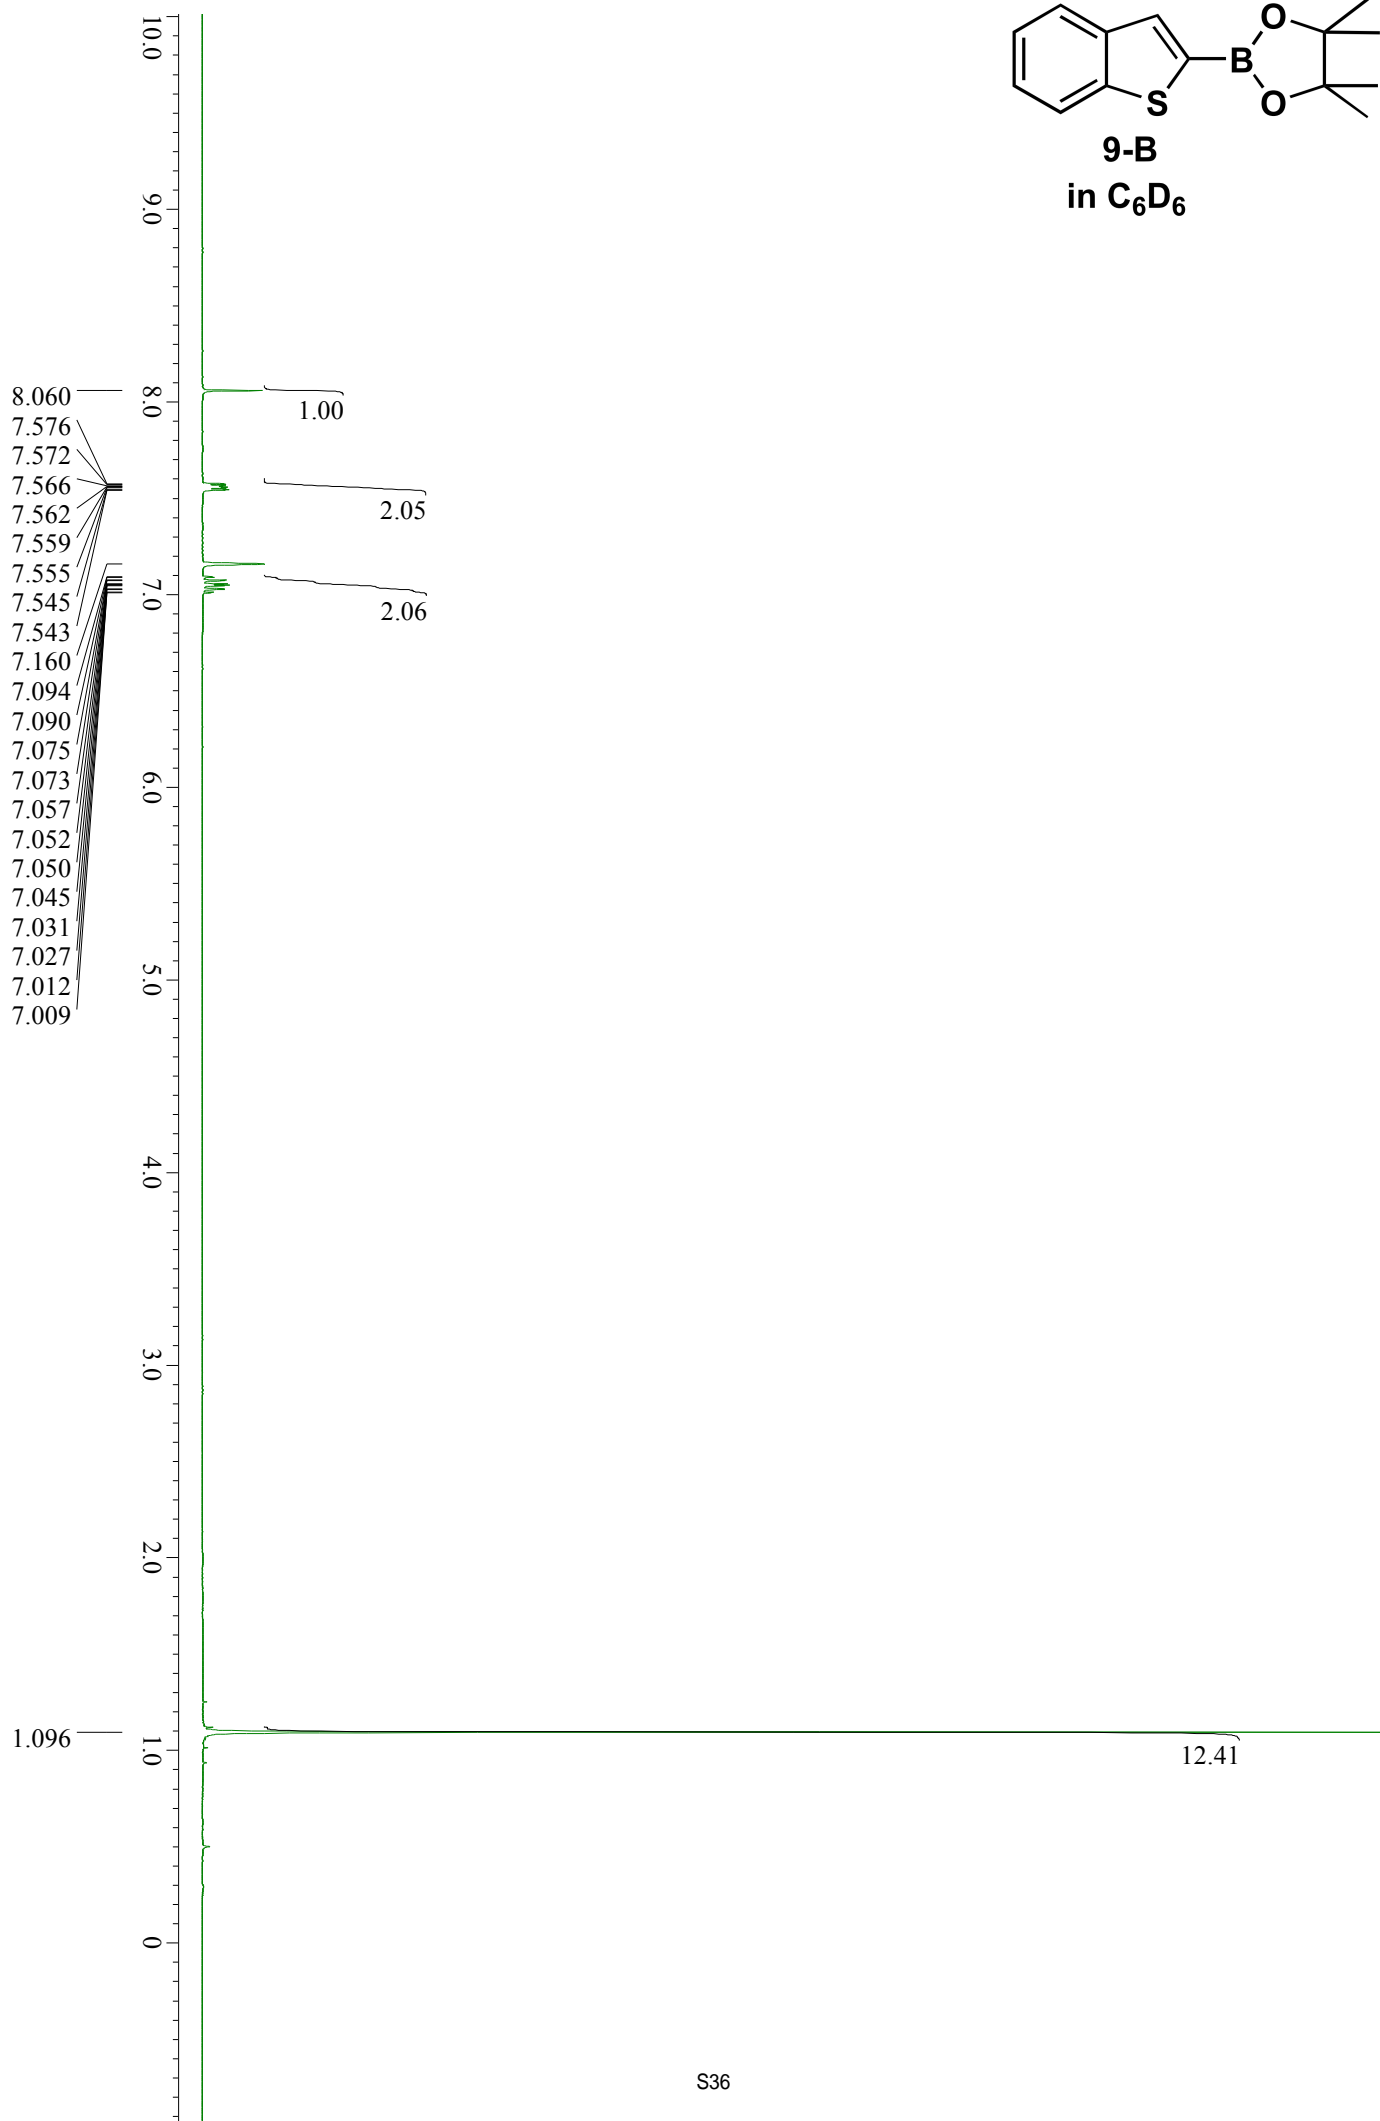

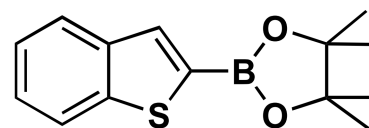

**9-B**  
in CDCl<sub>3</sub>

X : parts per Million : Proton

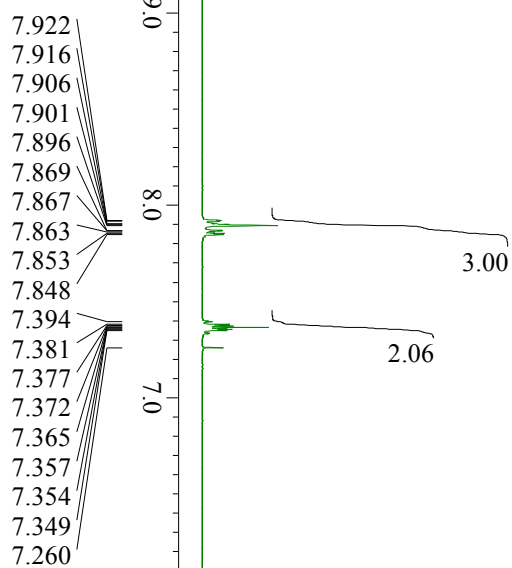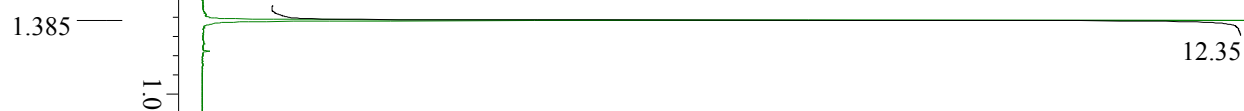

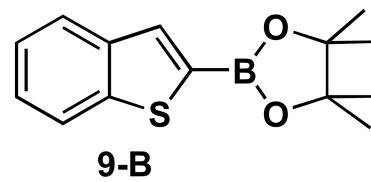

X : parts per Million : Carbon13

144.402  
141.046  
135.287  
128.298  
128.060  
127.812  
125.648  
124.723  
124.399  
122.892

84.382

24.848

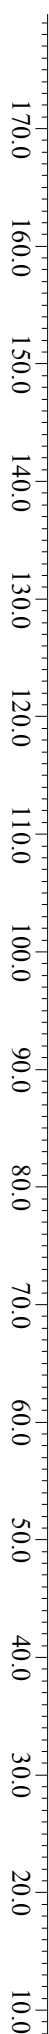

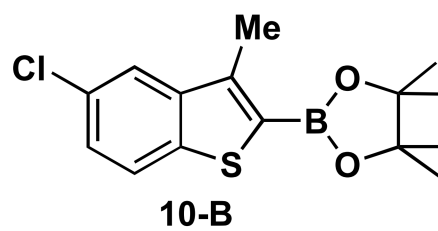

X : parts per Million : Proton

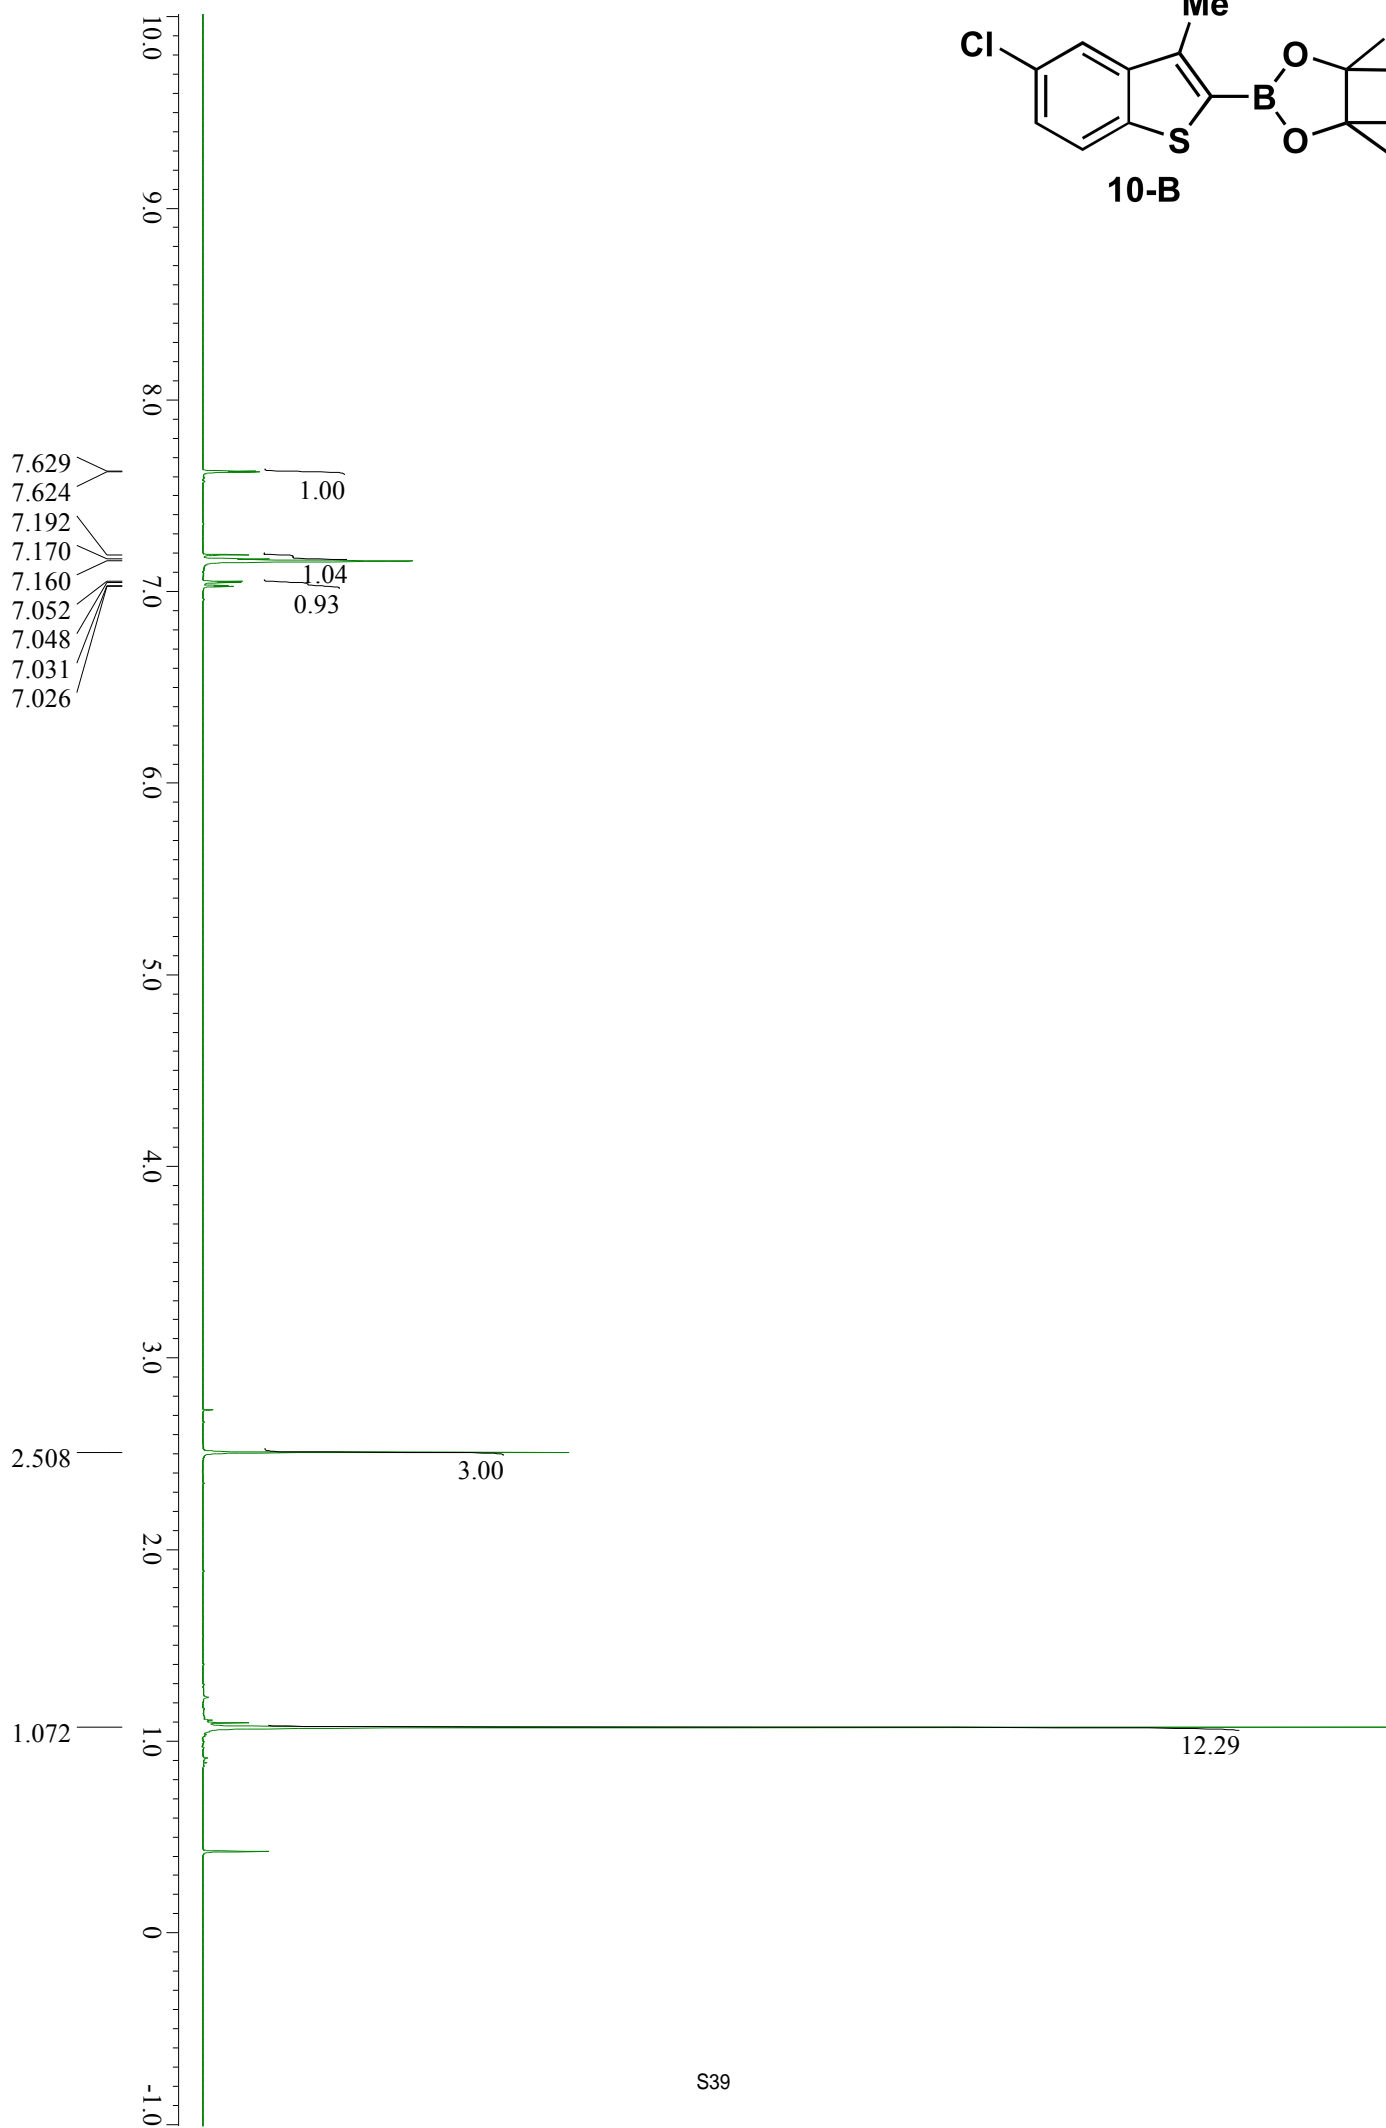

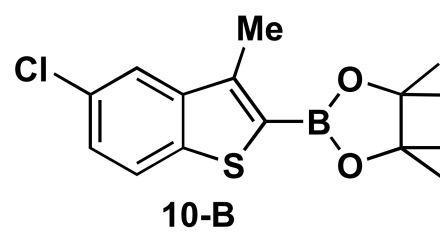

X : parts per Million : Carbon13

143.411  
142.896  
141.914

130.539  
128.308  
128.060  
127.822  
126.077  
124.017  
122.730

84.134

24.820

13.950

170.0  
160.0  
150.0  
140.0  
130.0  
120.0  
110.0  
100.0  
90.0  
80.0  
70.0  
60.0  
50.0  
40.0  
30.0  
20.0  
10.0



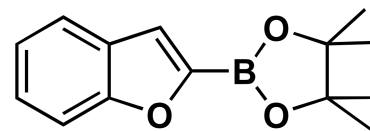

**11-B**  
in C<sub>6</sub>D<sub>6</sub>

X : parts per Million : Proton

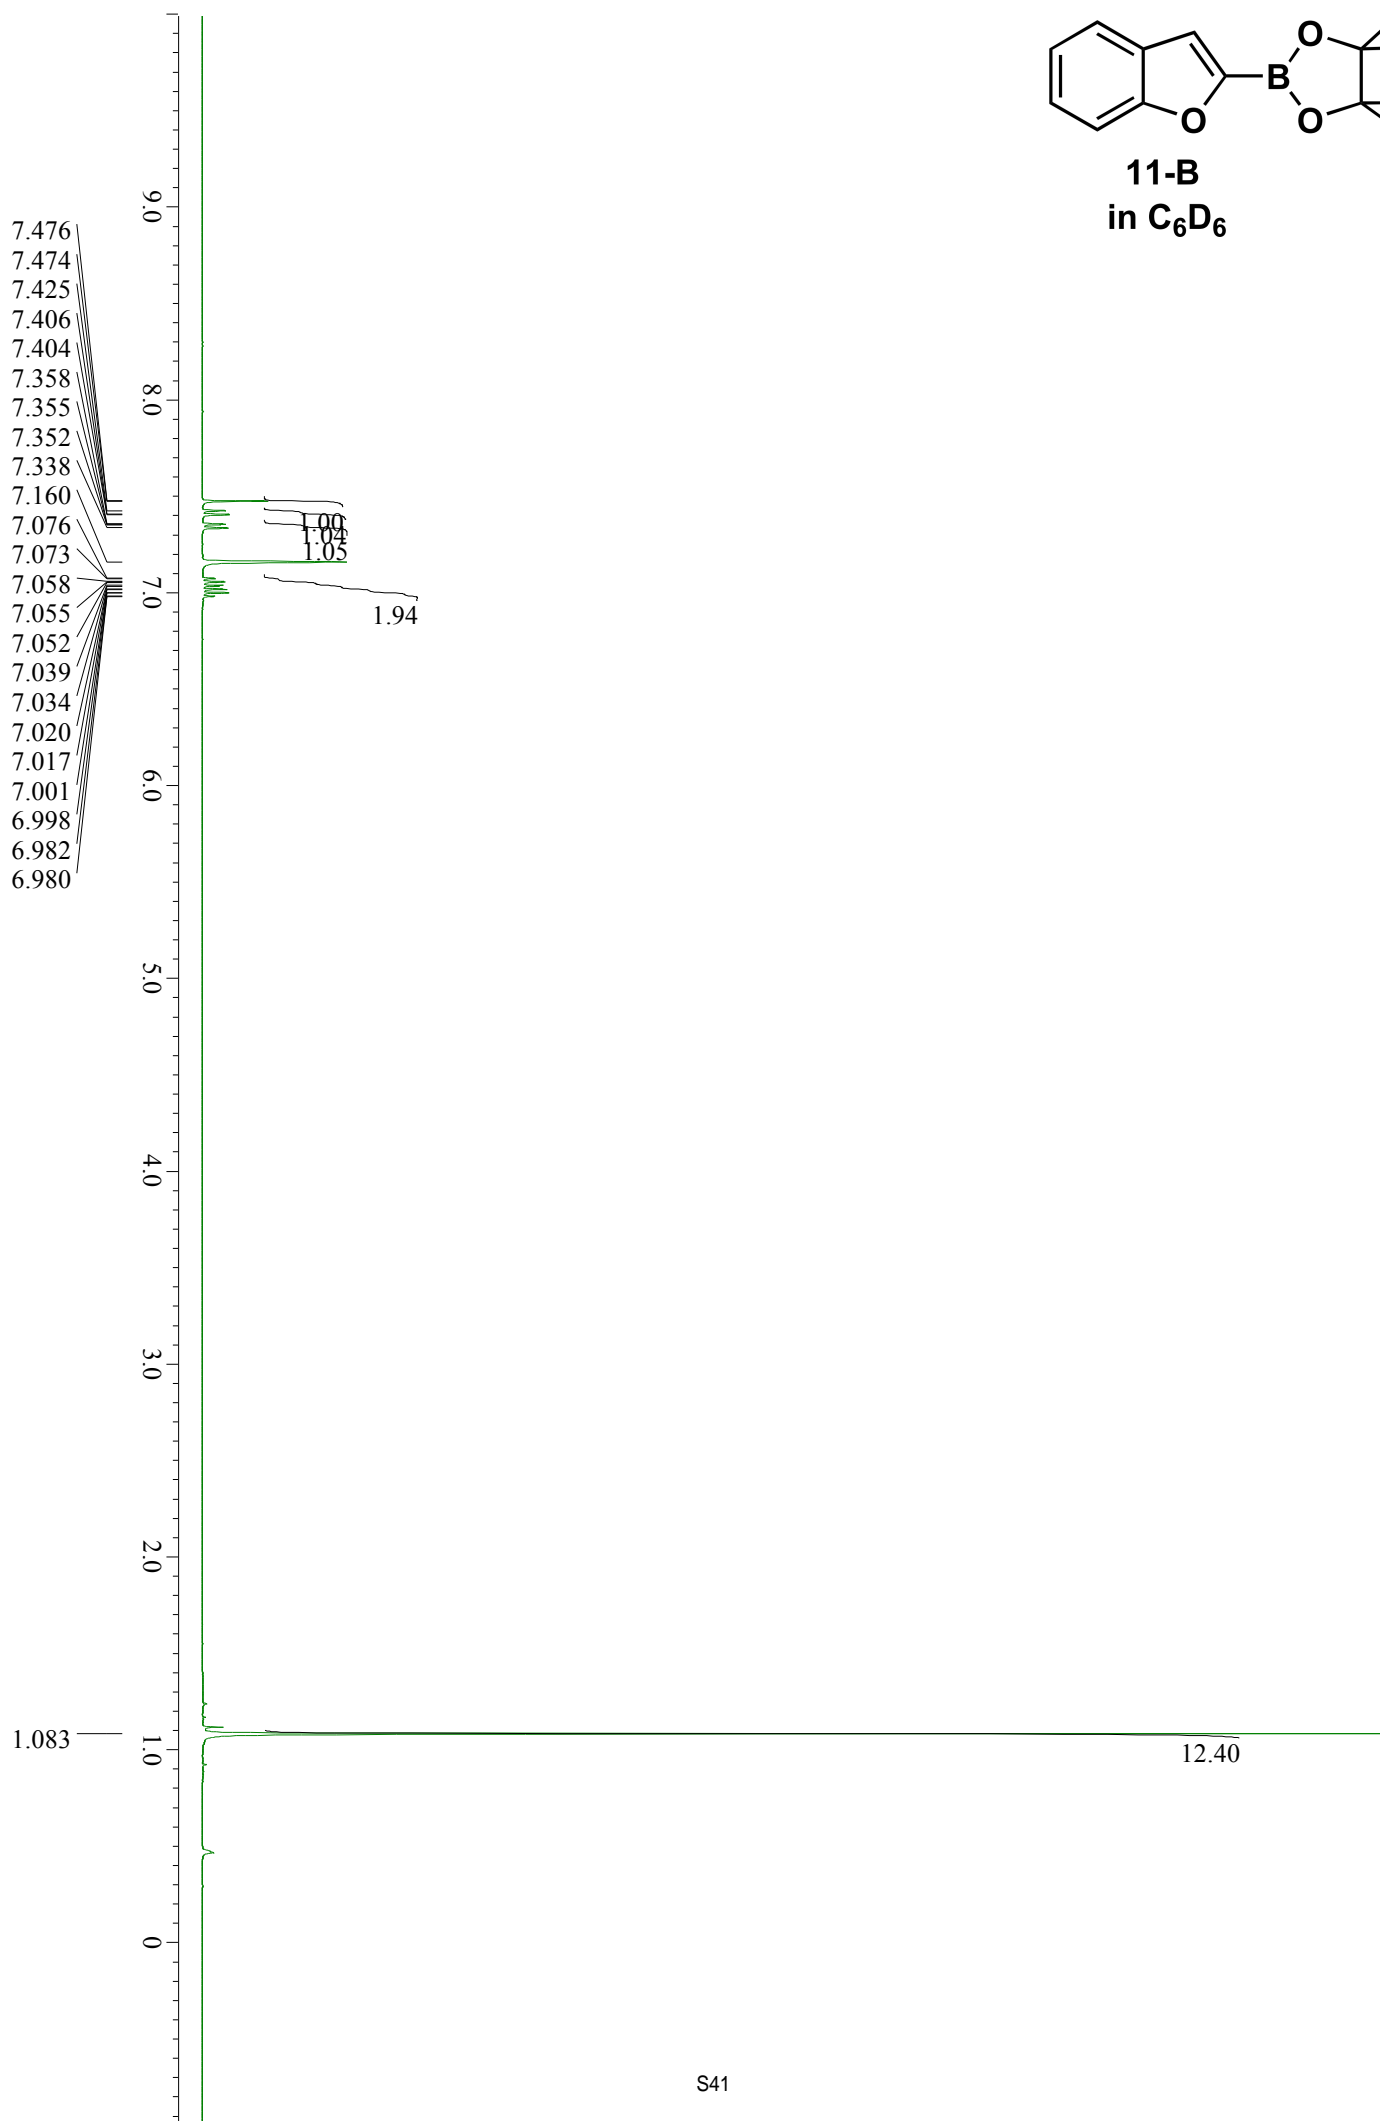

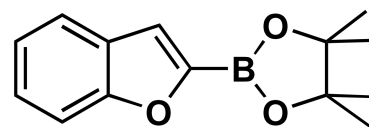

**11-B**  
in CDCl<sub>3</sub>

X : parts per Million : Proton

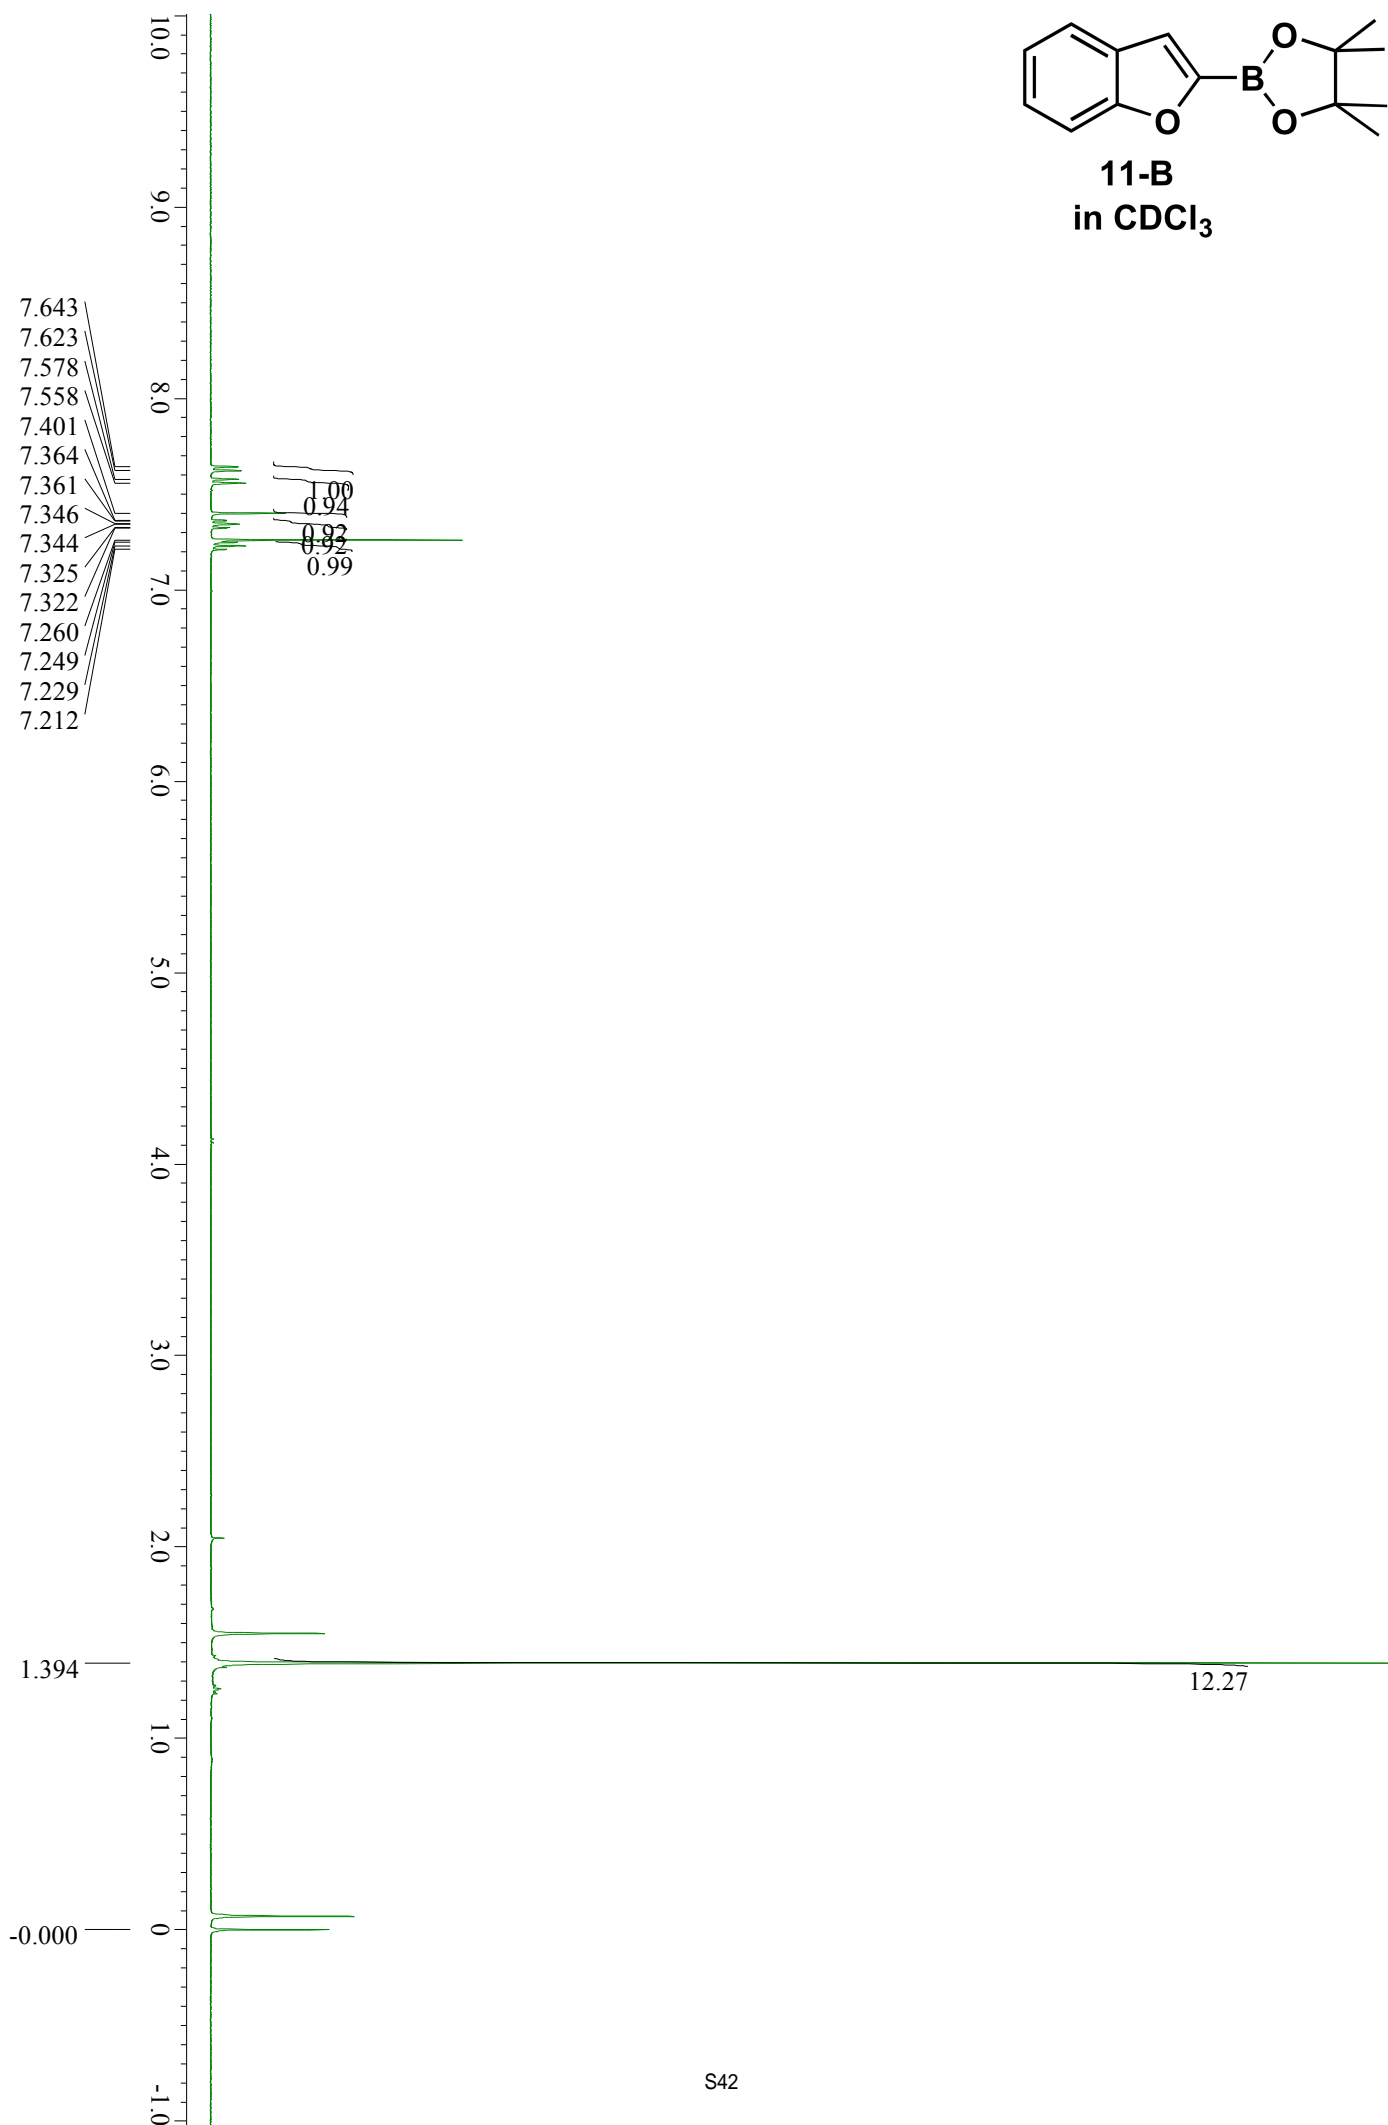

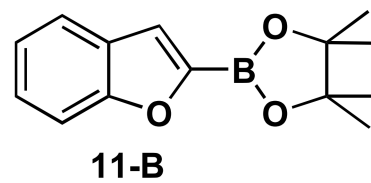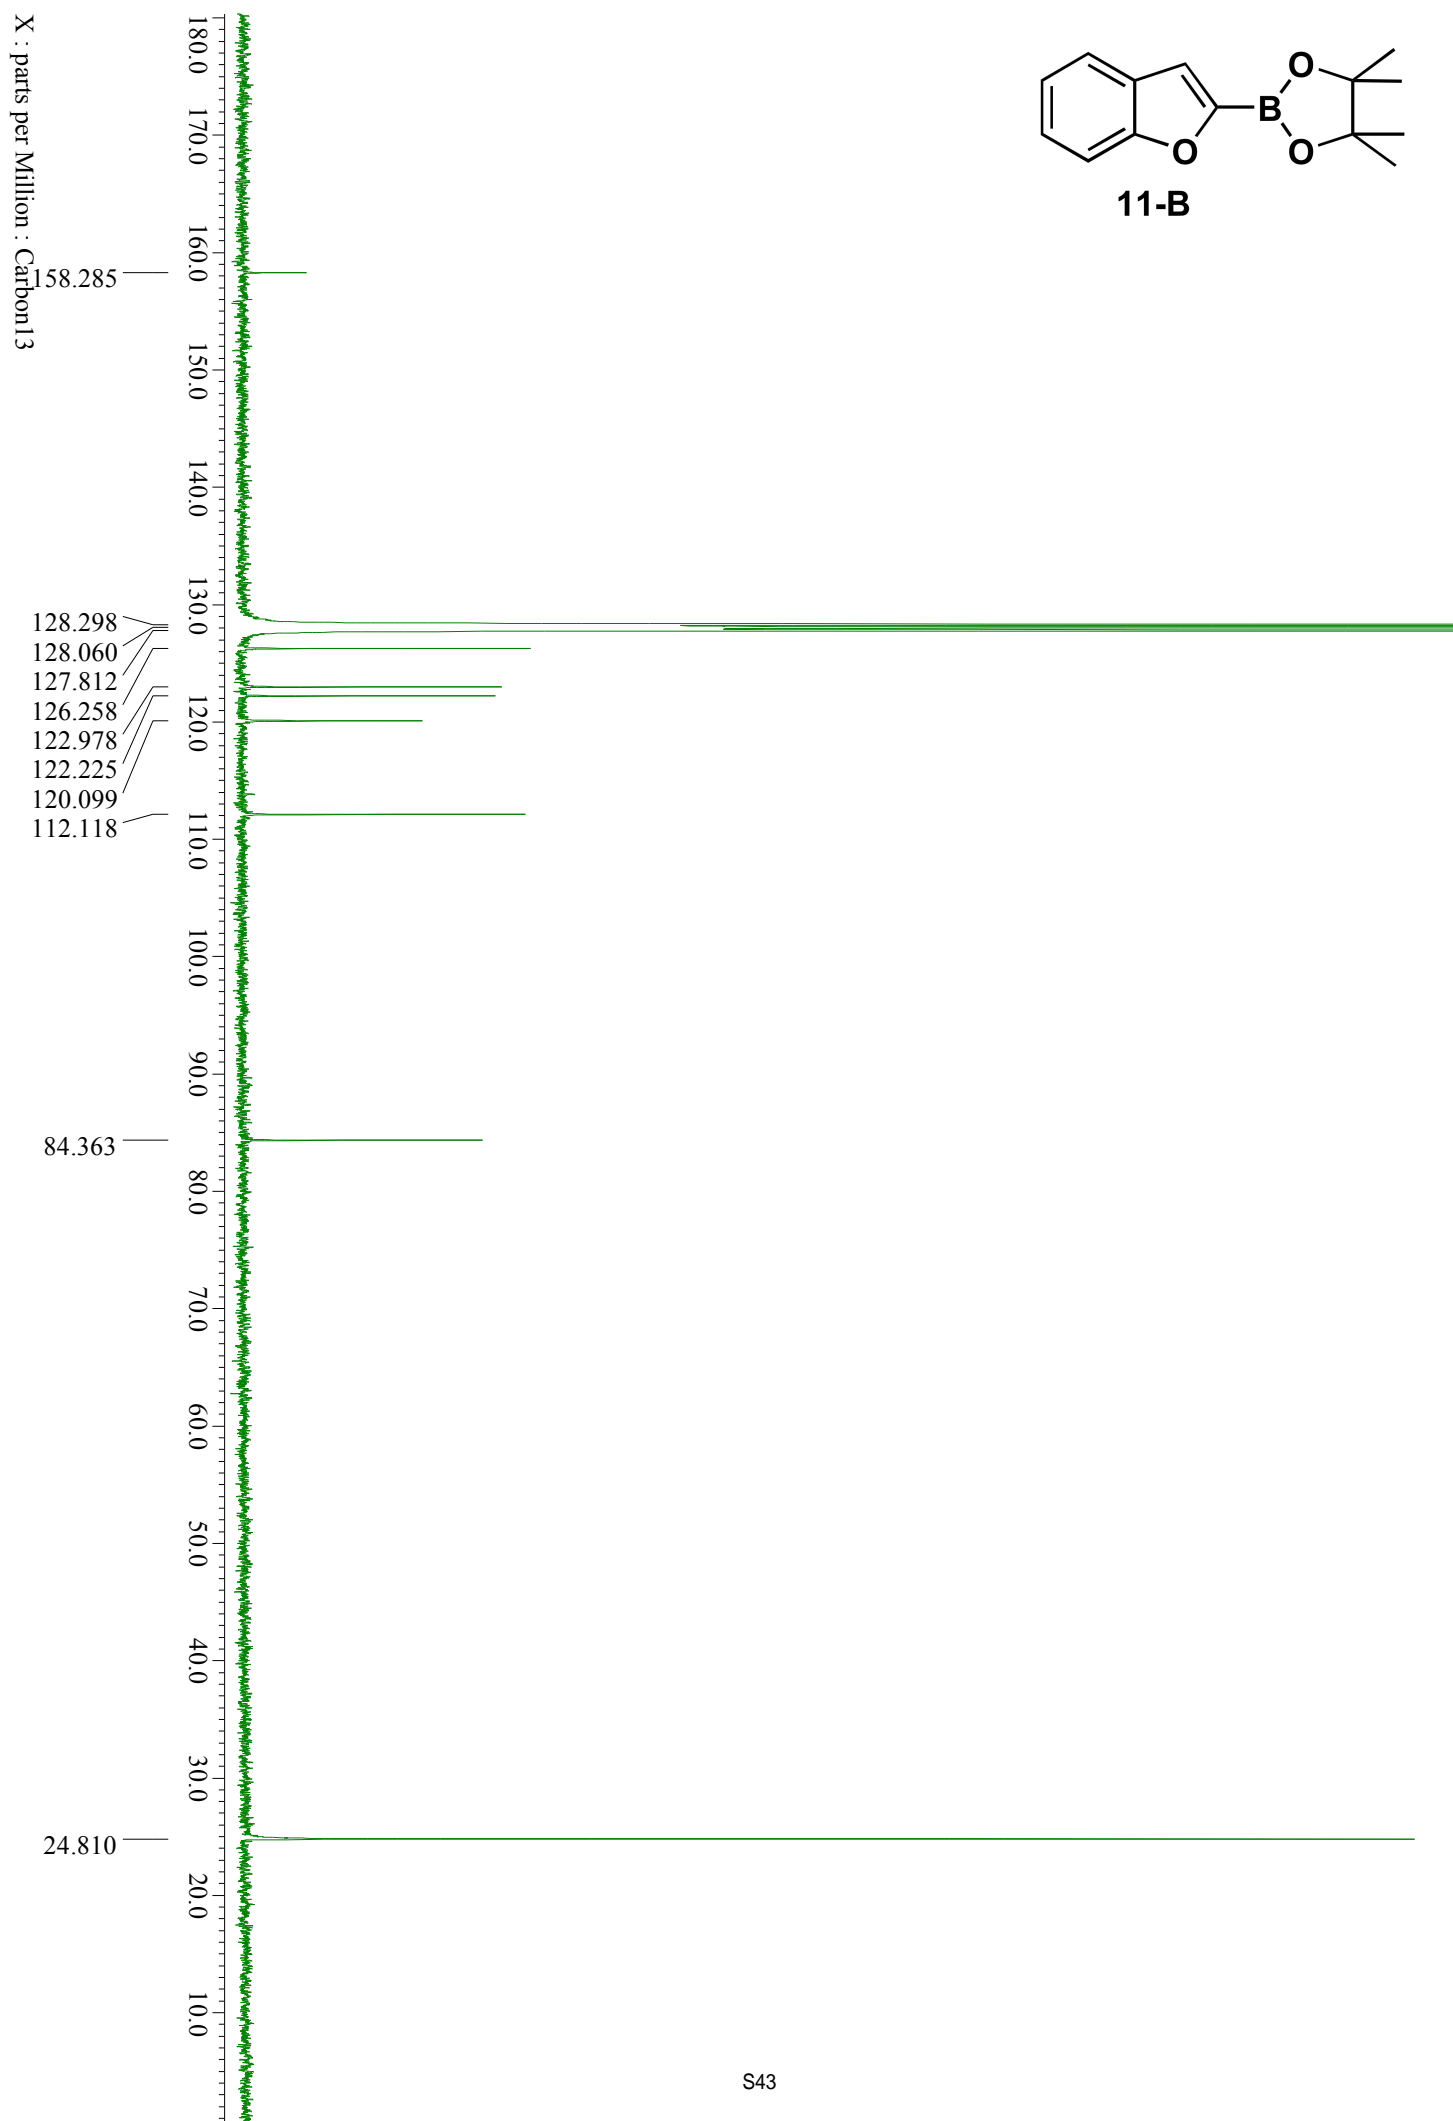

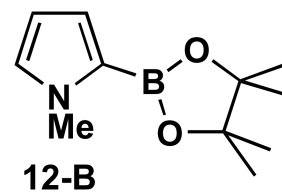

X : parts per Million : Proton

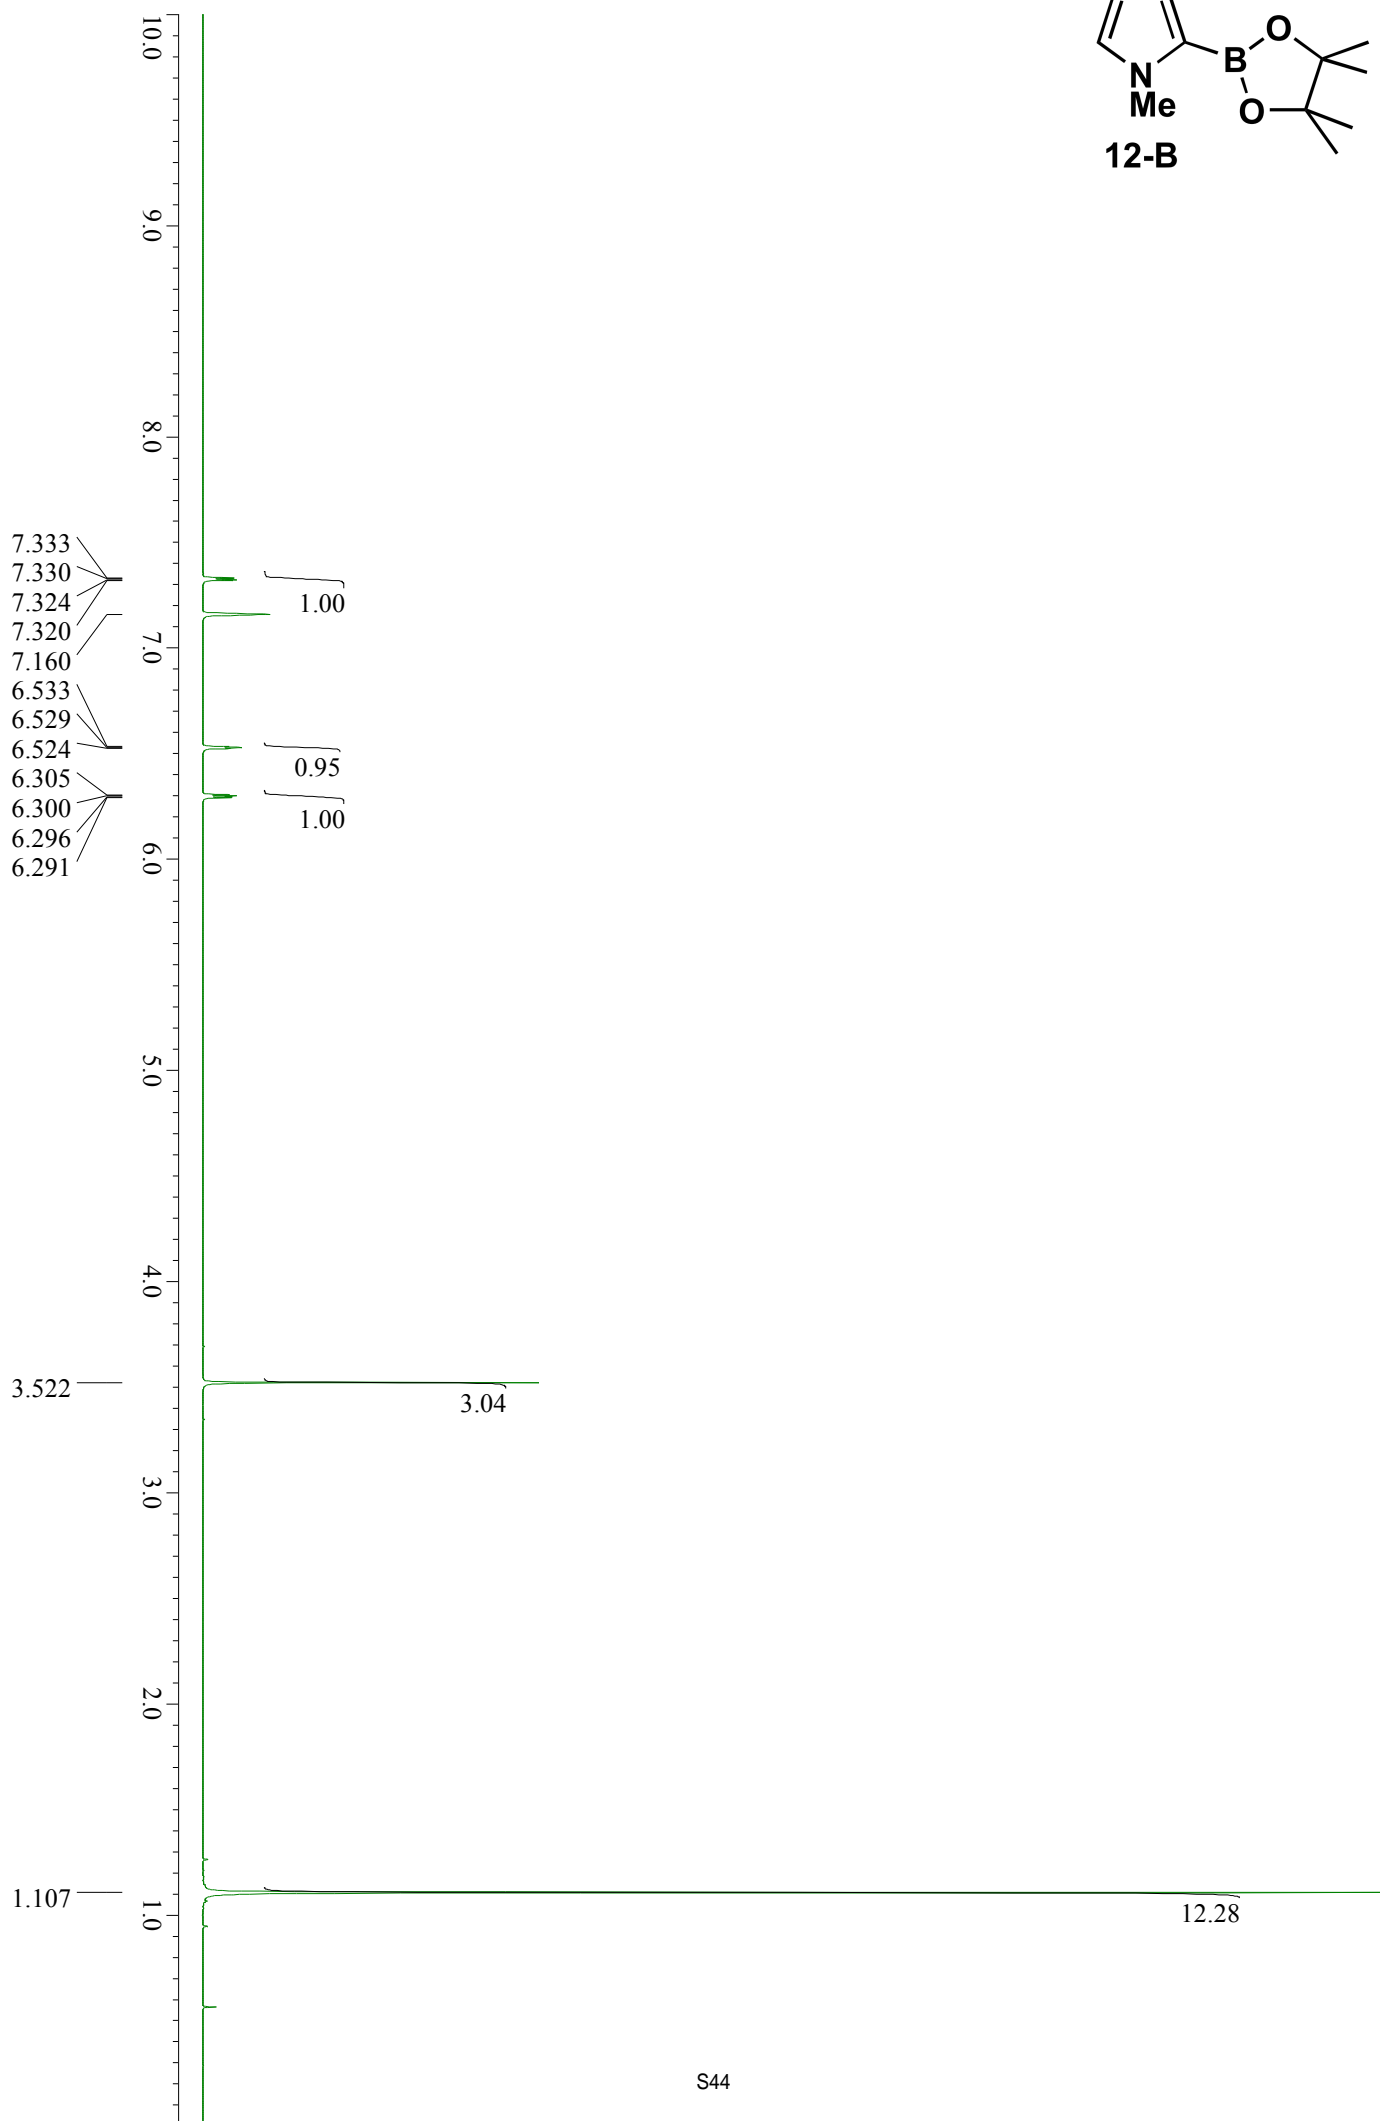

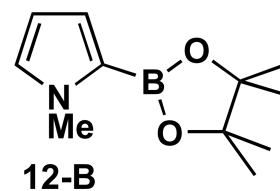

X : parts per Million : Carbon13

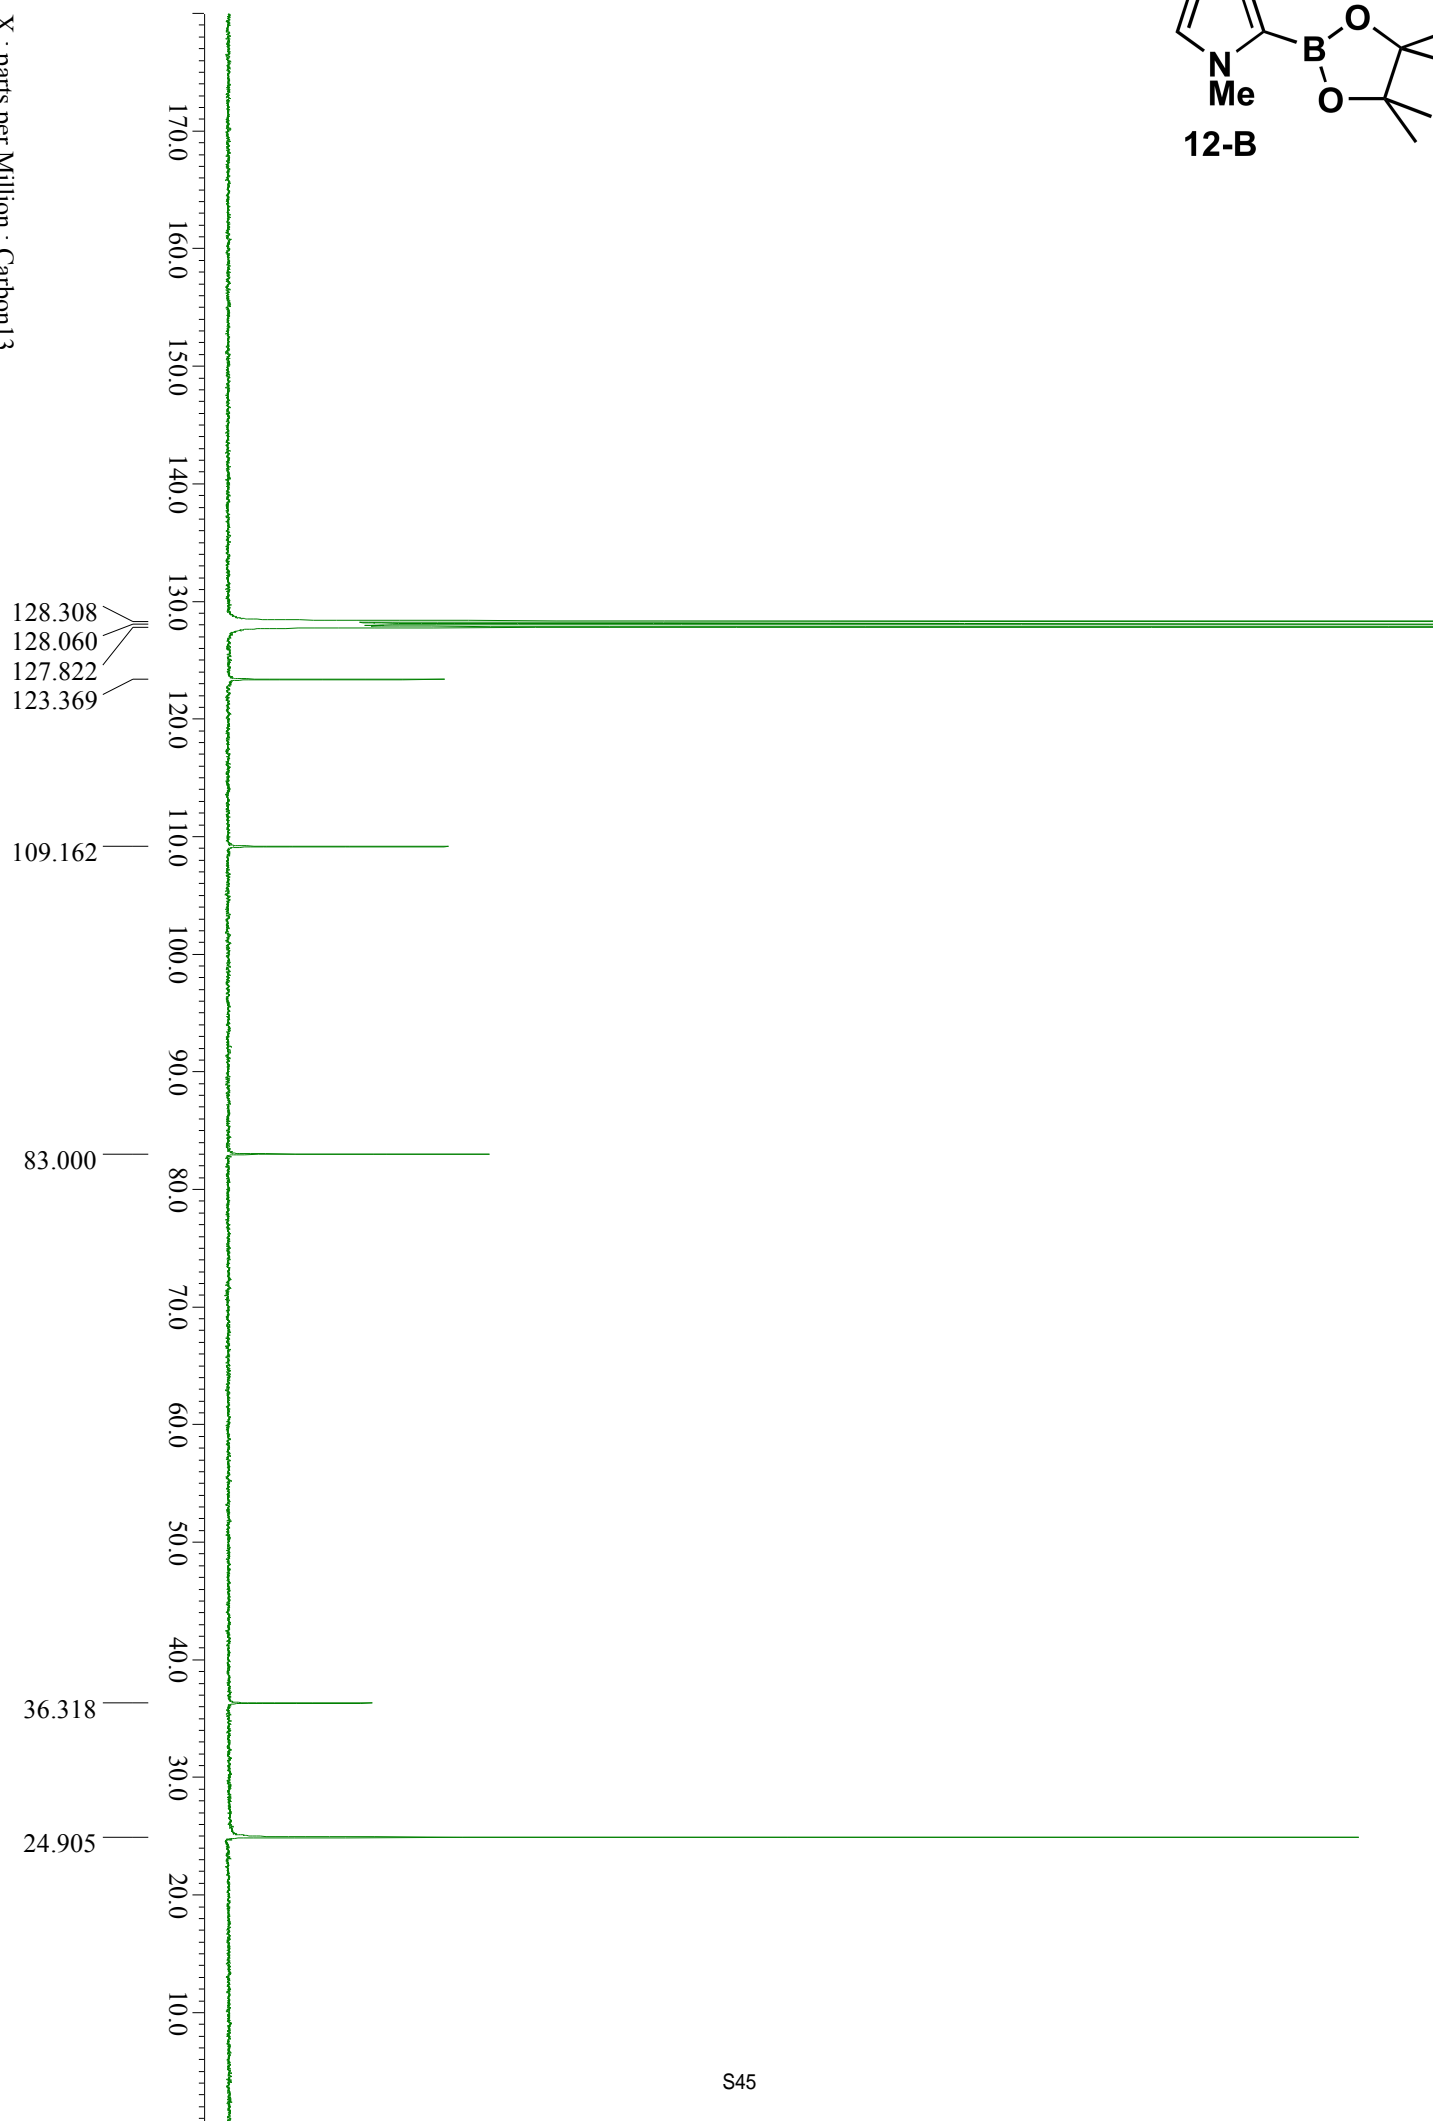

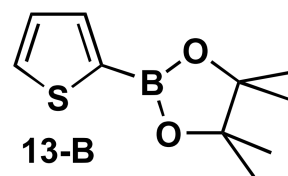

X : parts per Million : Proton

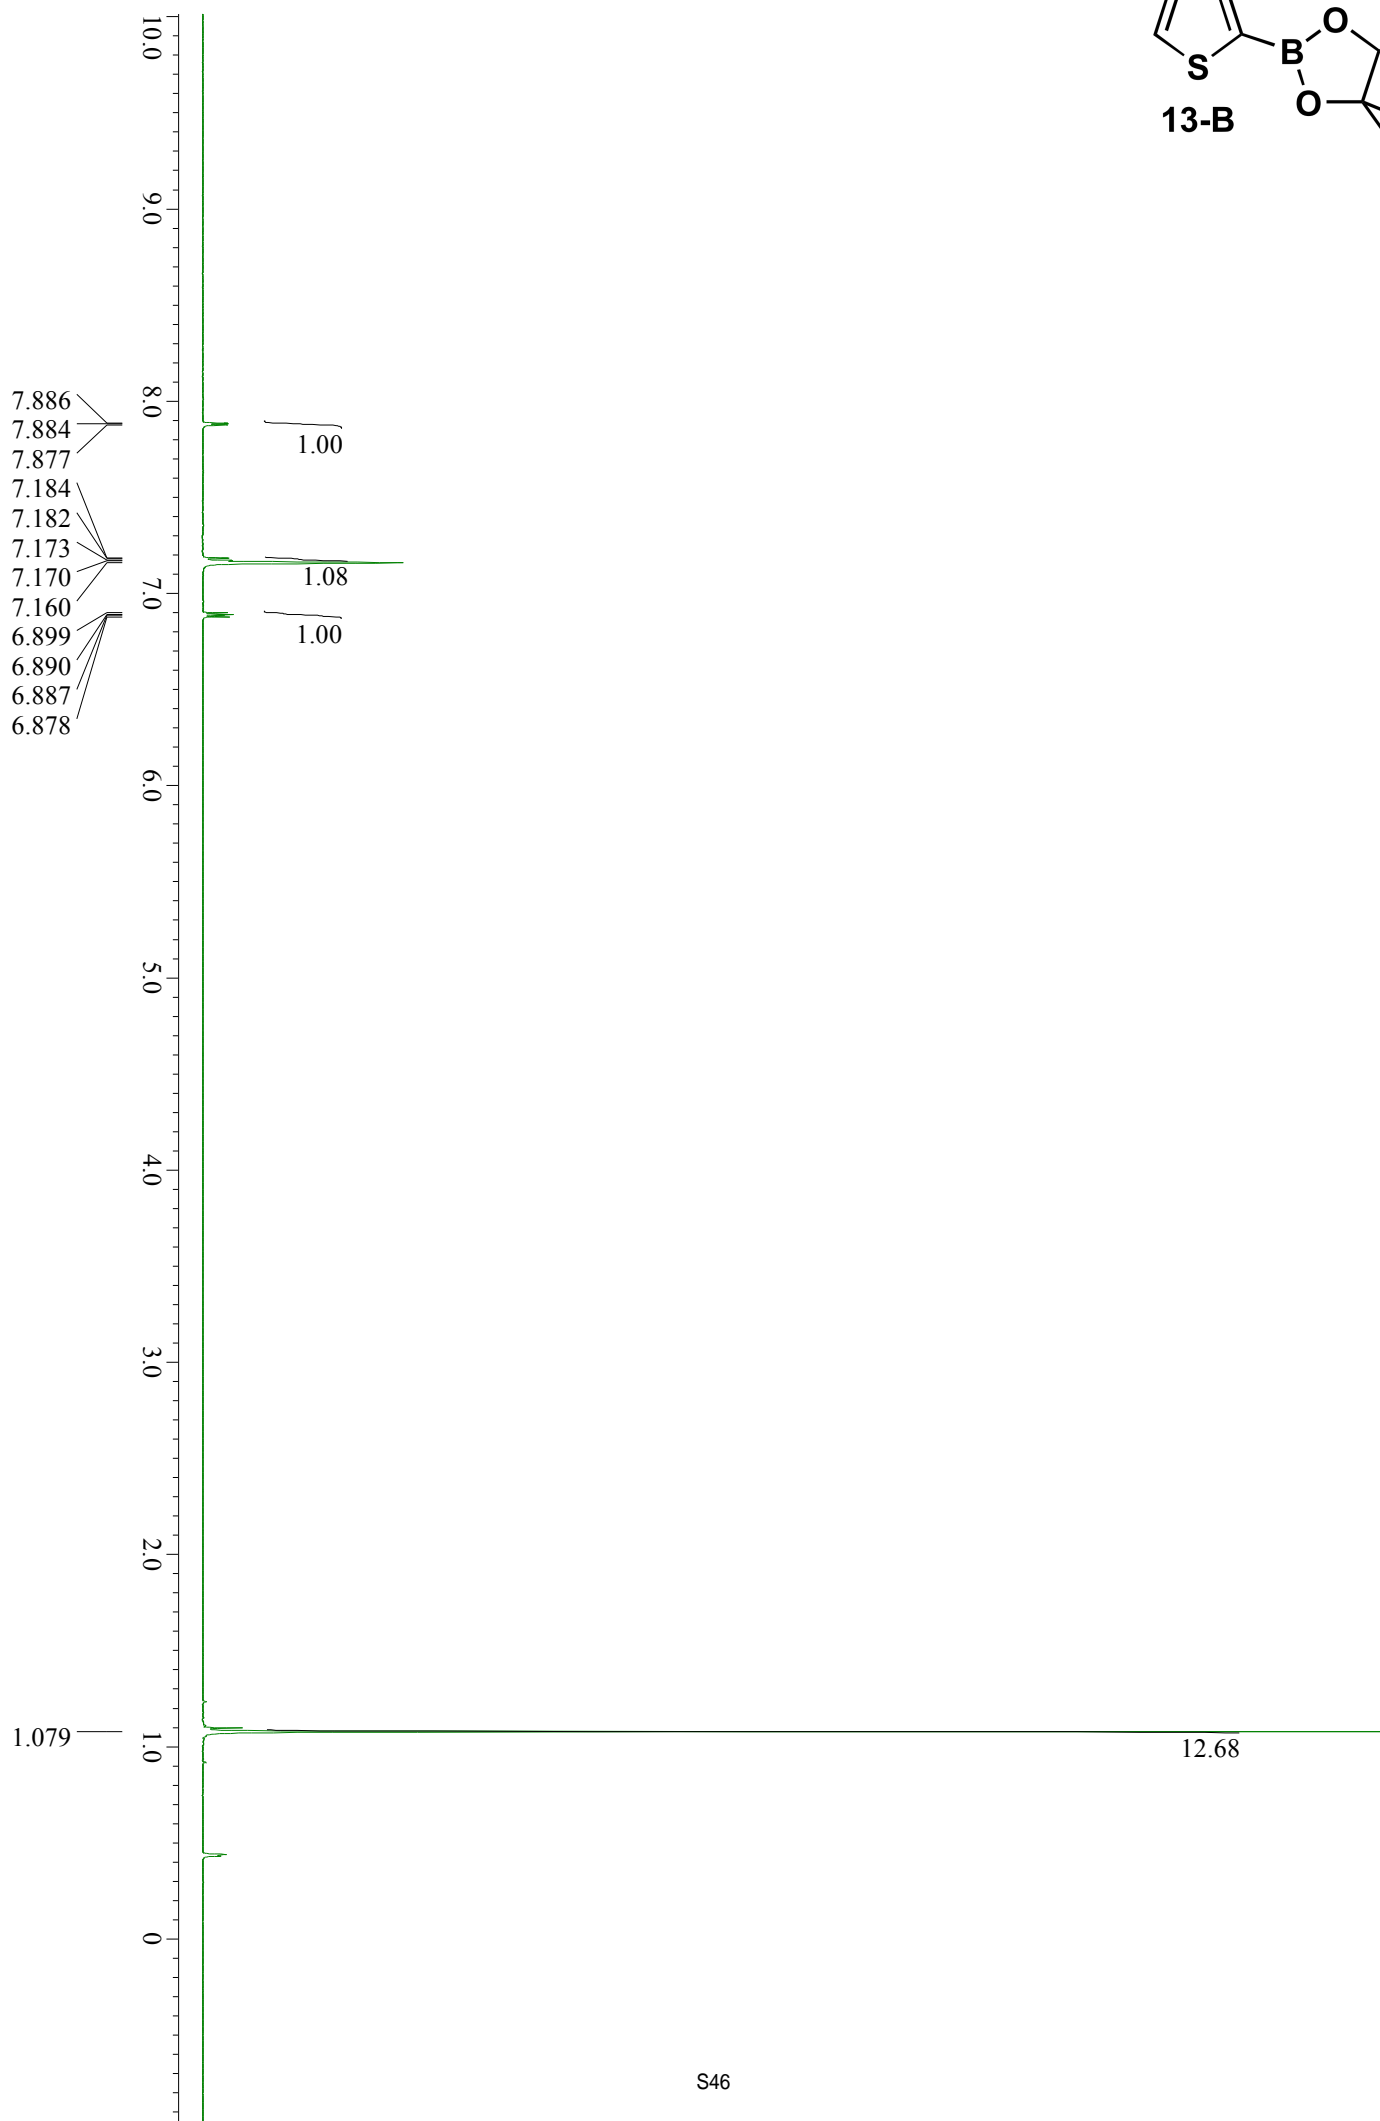

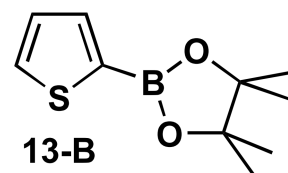

X : parts per Million : Carbon13

137.738  
132.761  
128.499  
128.298  
128.060  
127.812

84.020

24.829

170.0  
160.0  
150.0  
140.0  
130.0  
120.0  
110.0  
100.0  
90.0  
80.0  
70.0  
60.0  
50.0  
40.0  
30.0  
20.0  
10.0

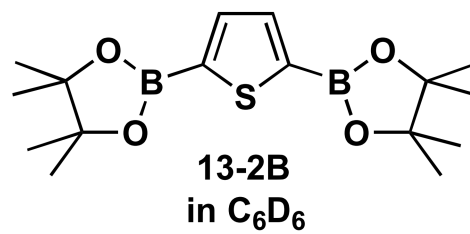

X : parts per Million : Proton

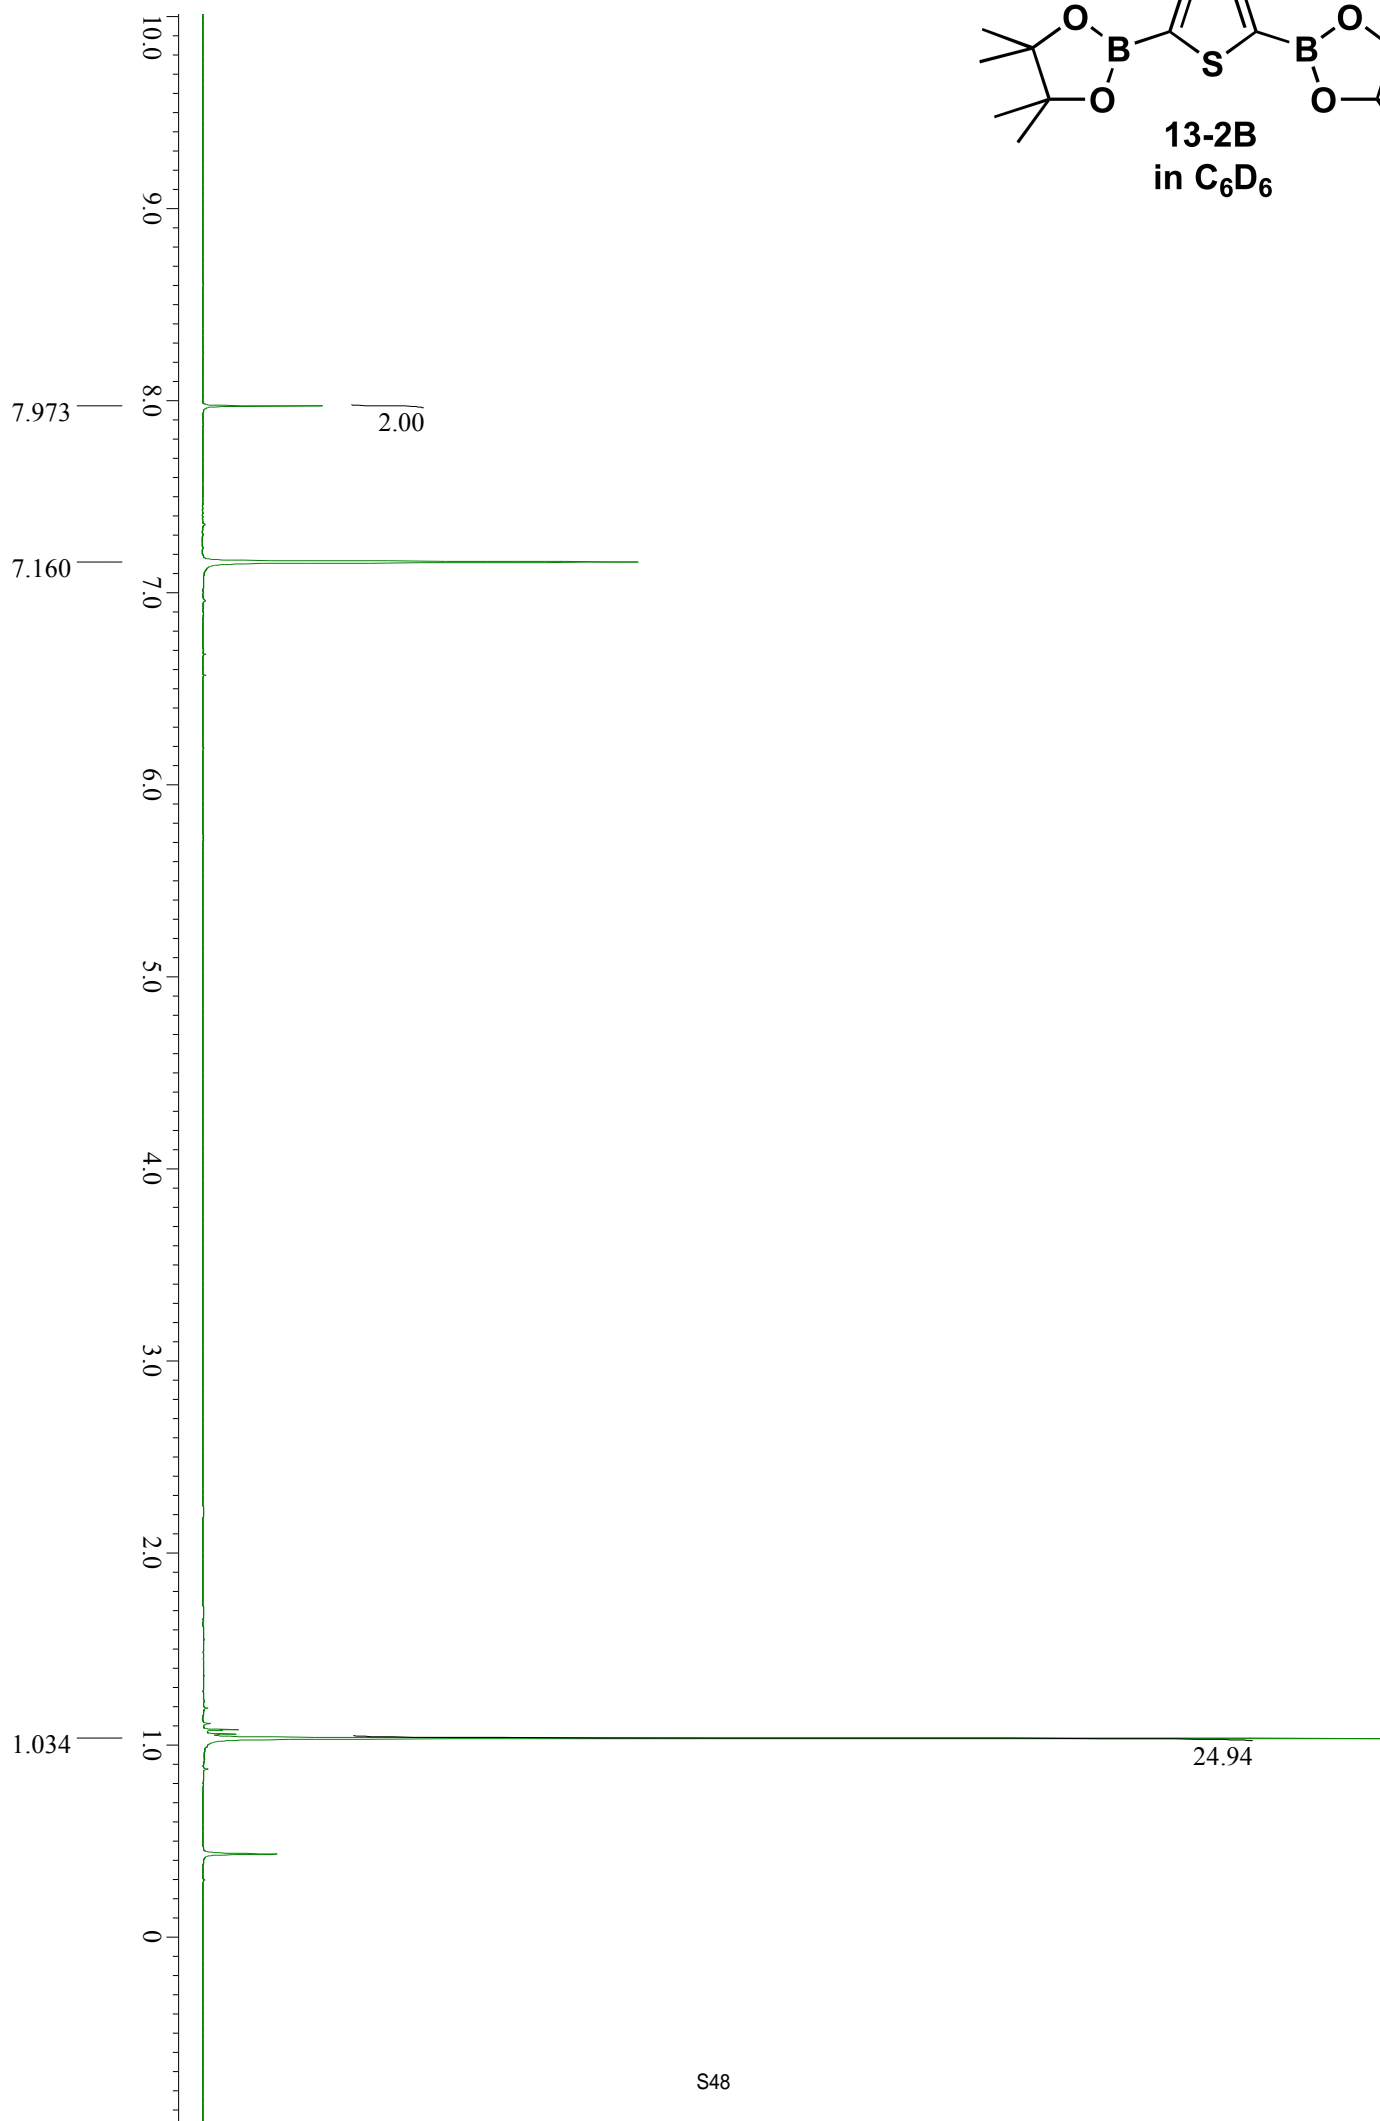



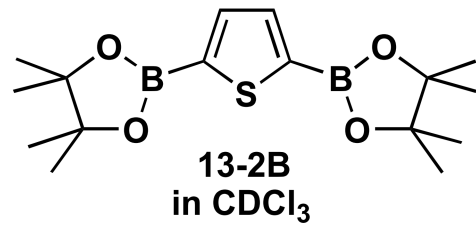

X : parts per Million : Proton

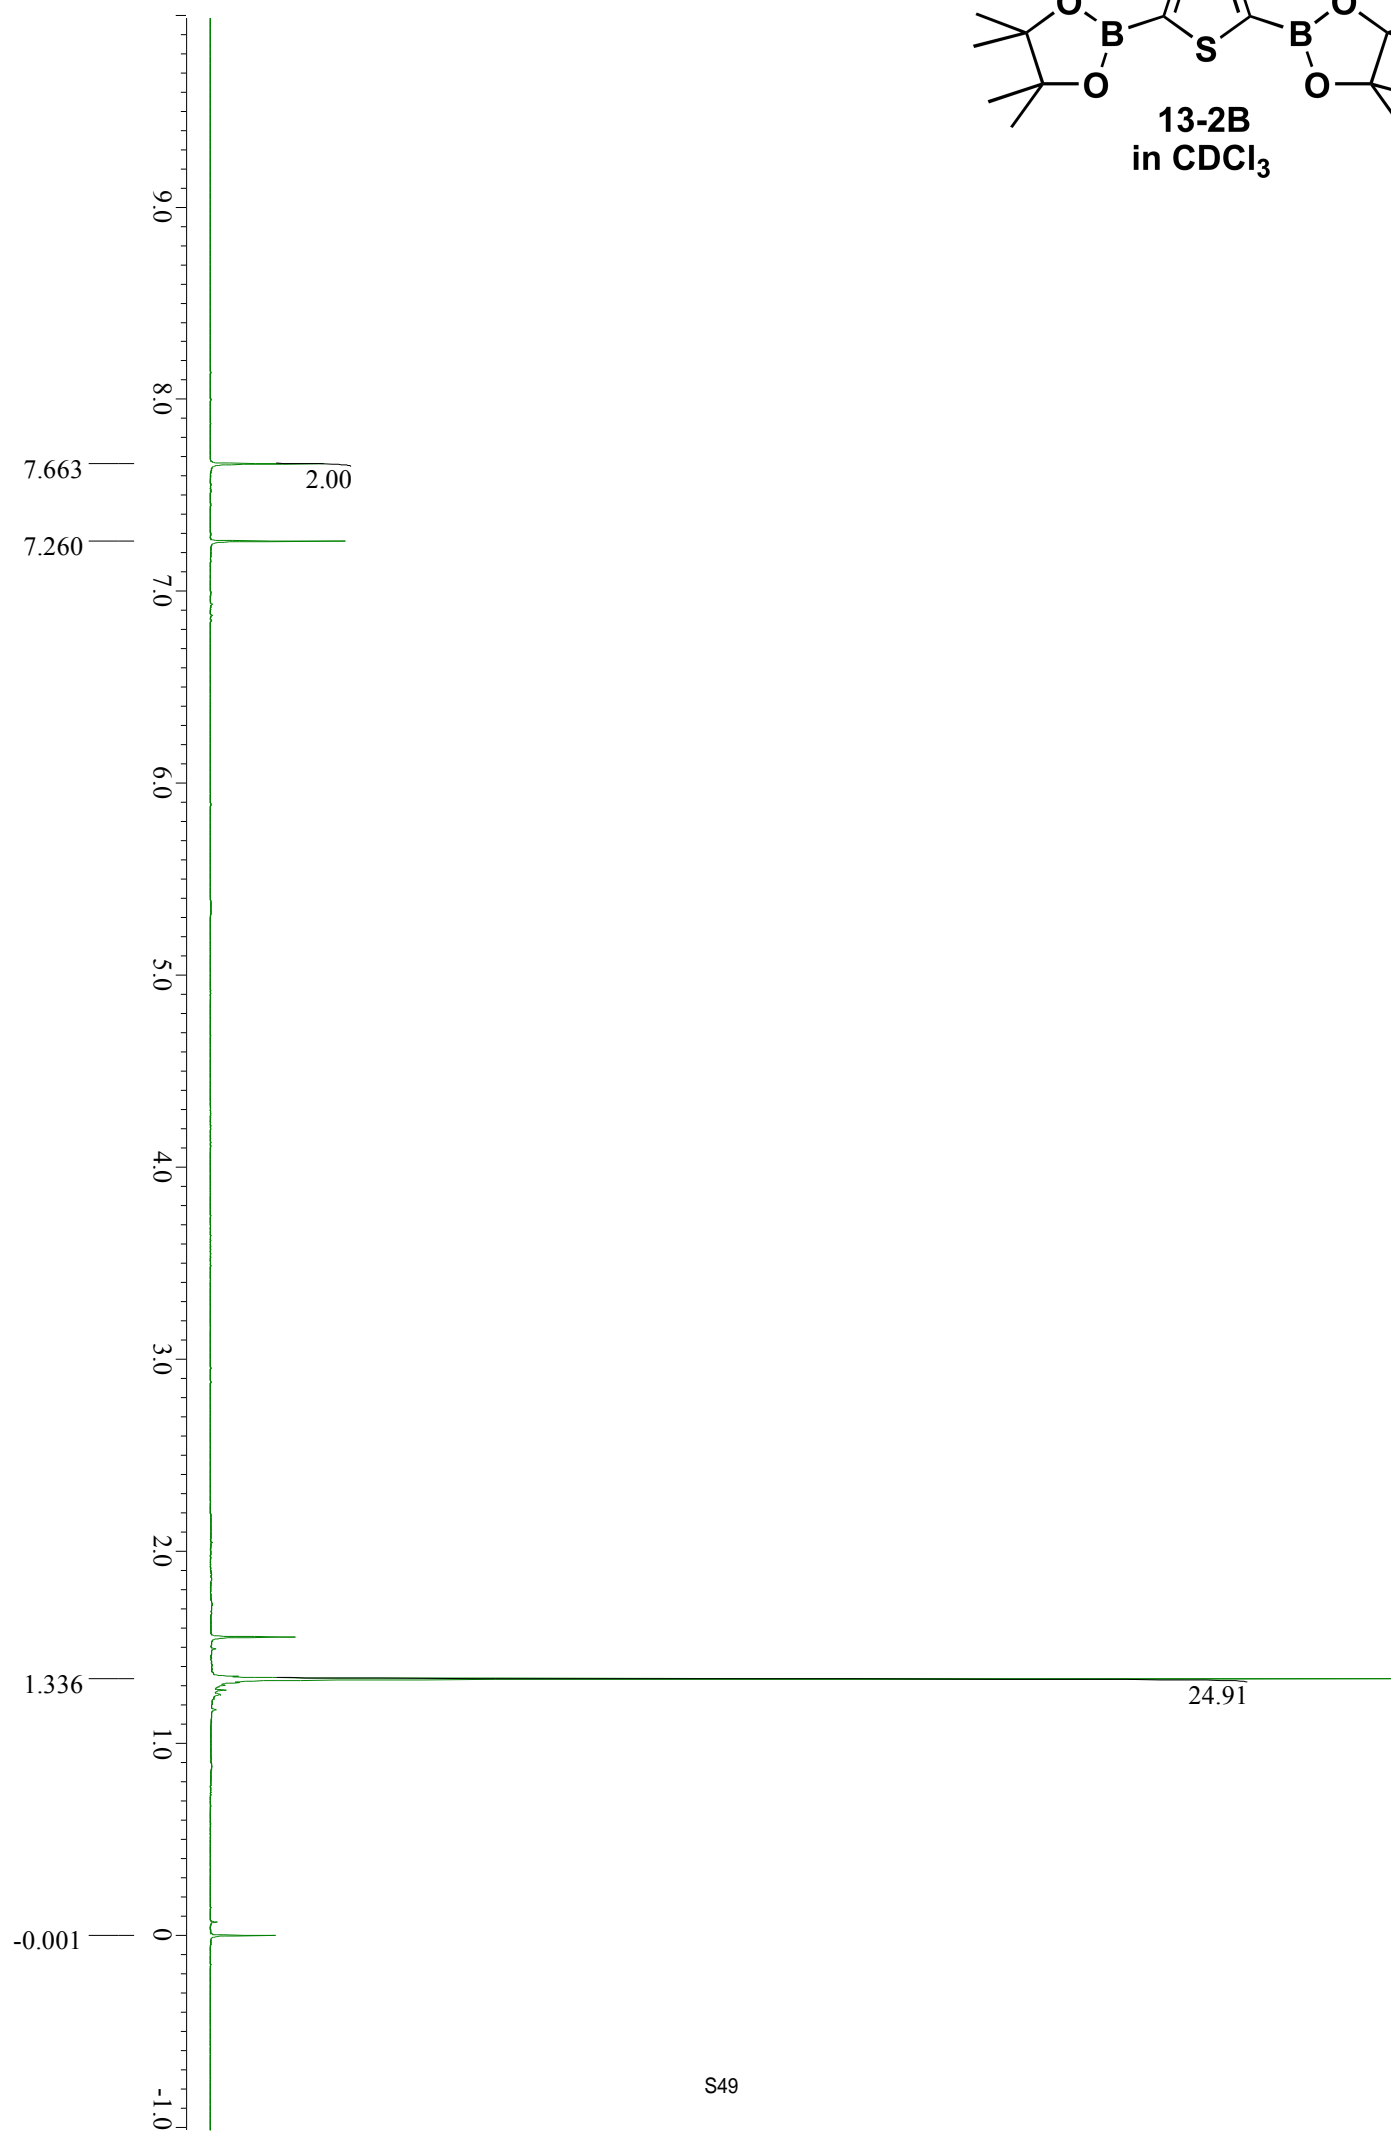

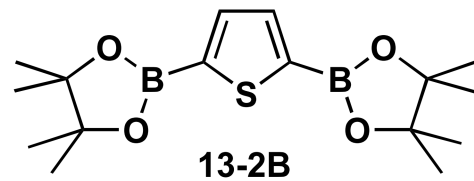

X : parts per Million : Carbon13

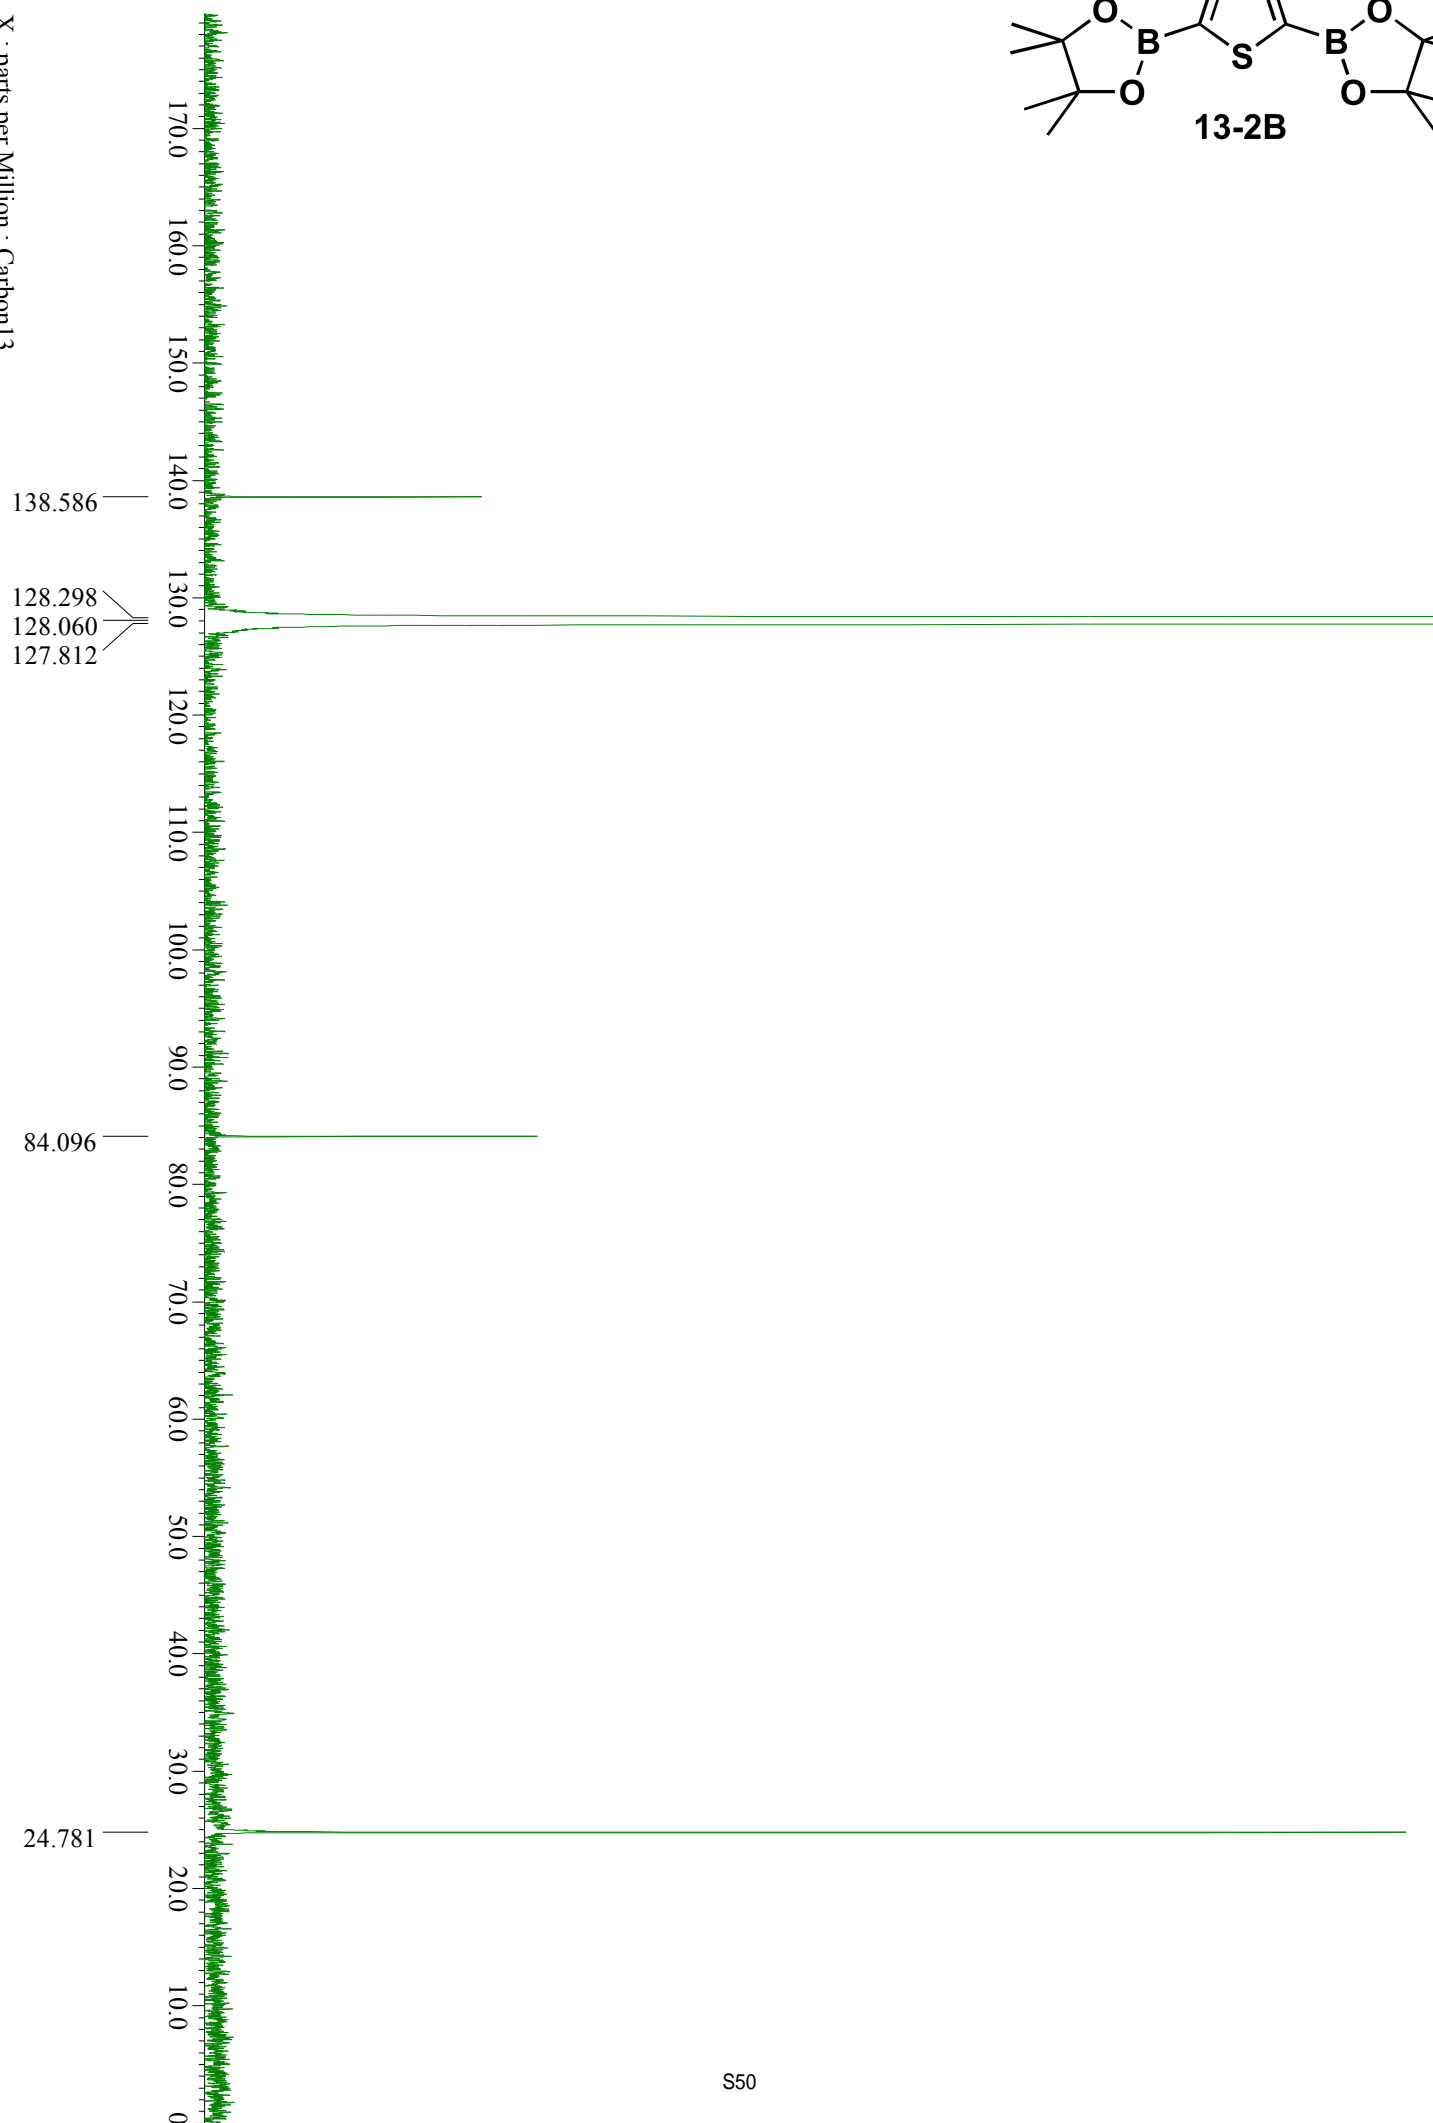

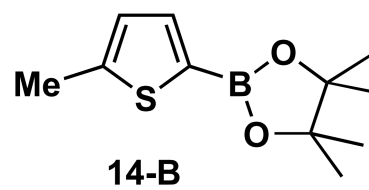

X : parts per Million : Proton

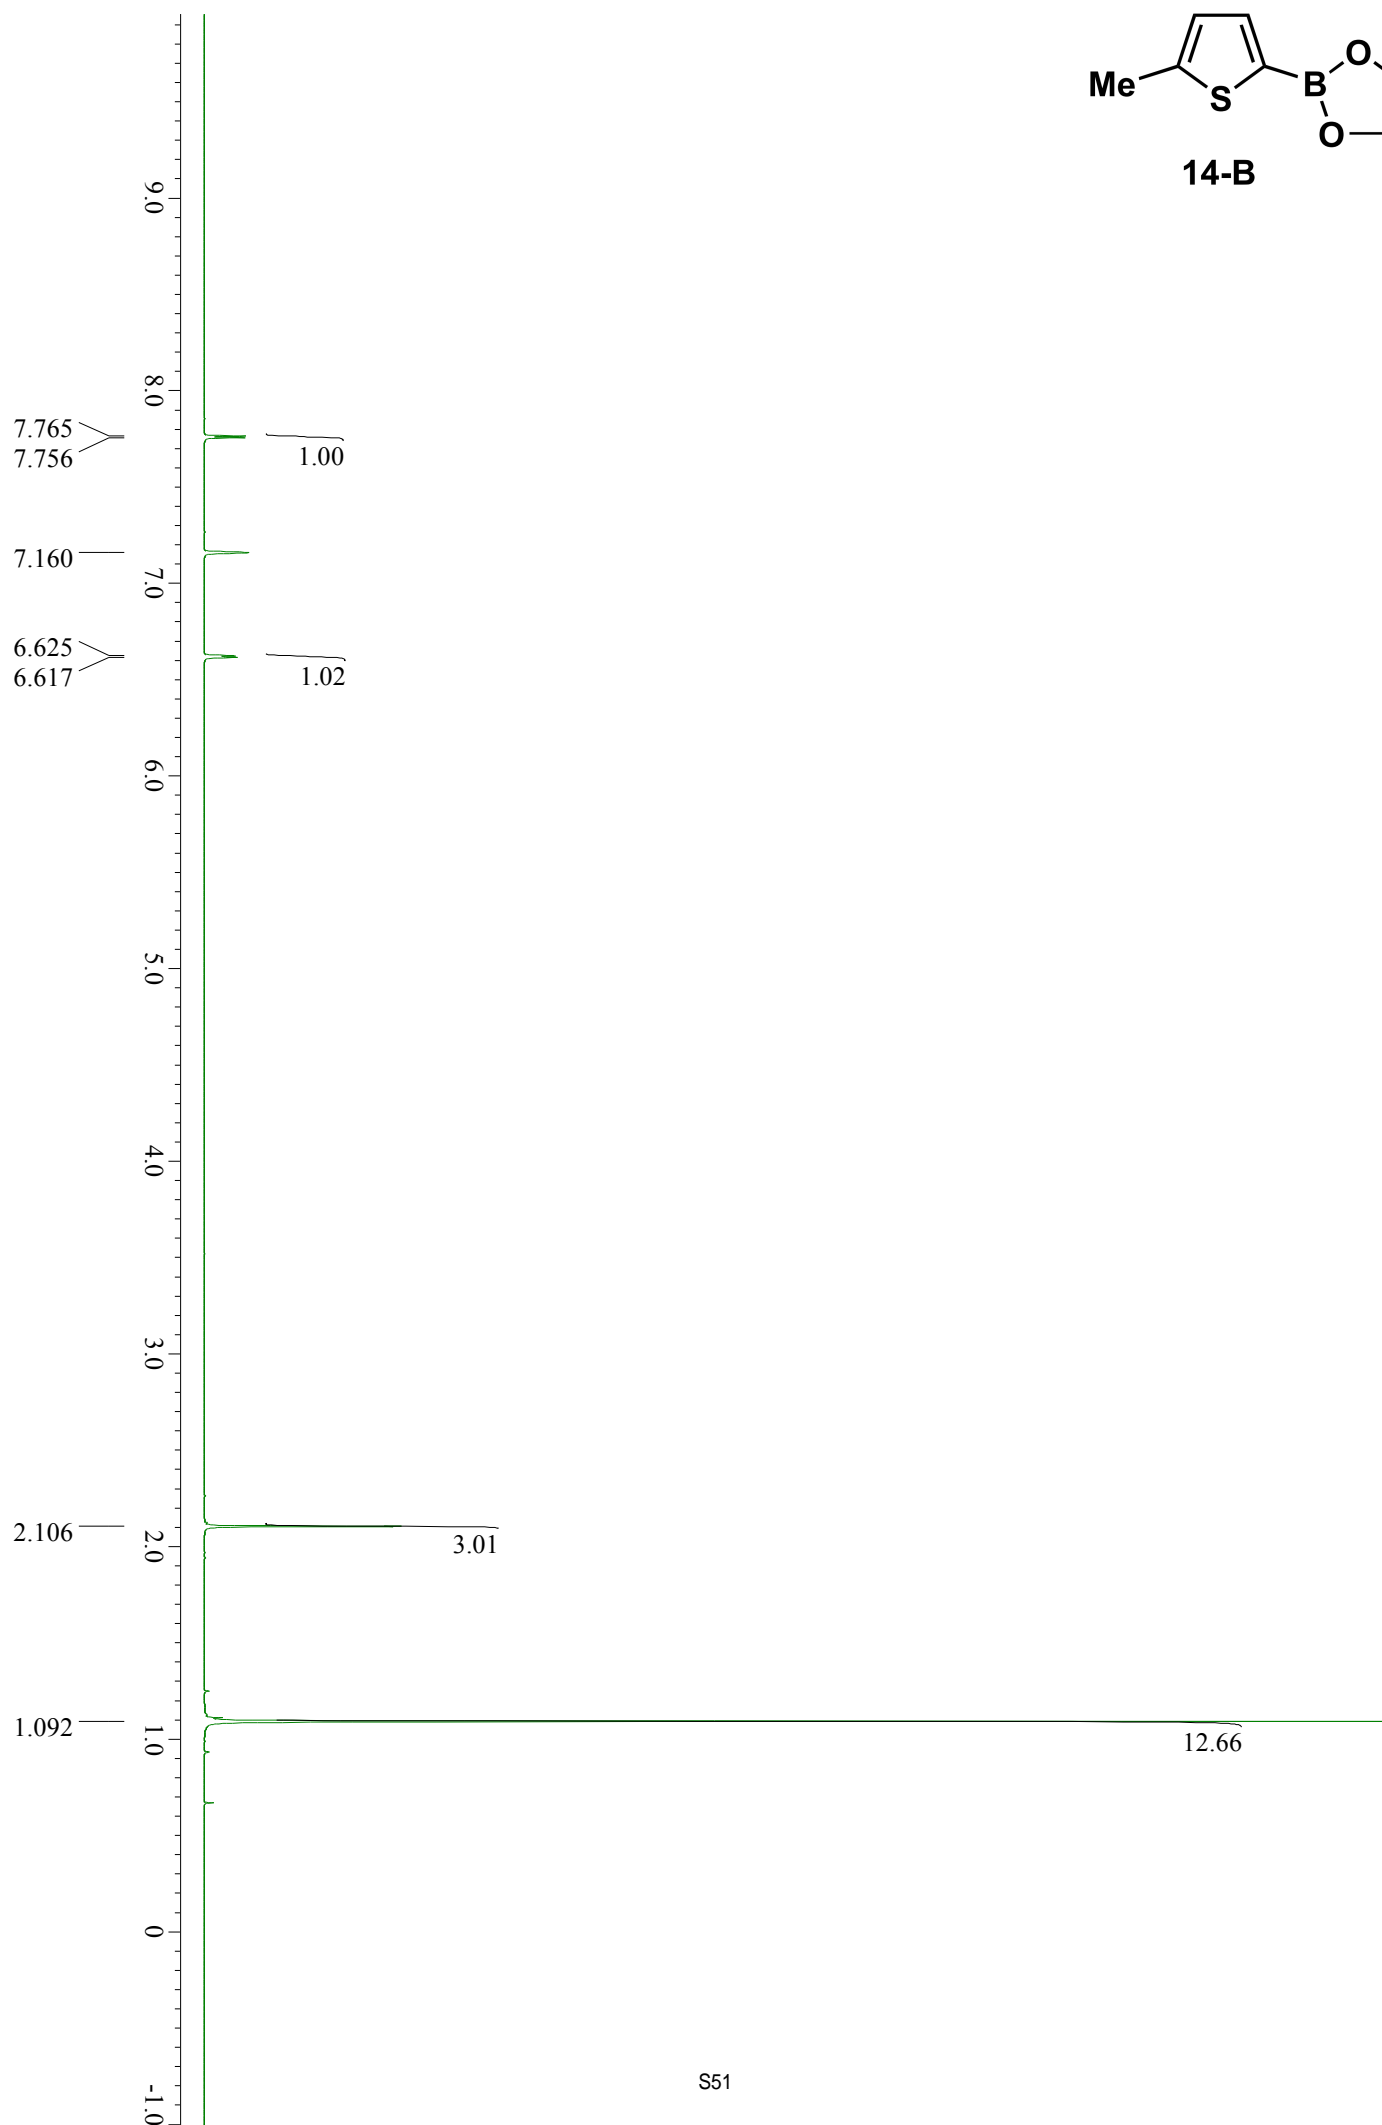

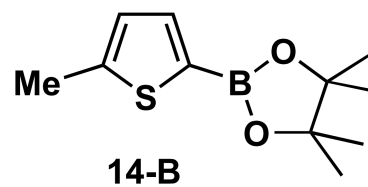

X : parts per Million : Carbon13

147.758

138.357

128.308

128.060

127.822

127.459

83.858

24.867

15.094

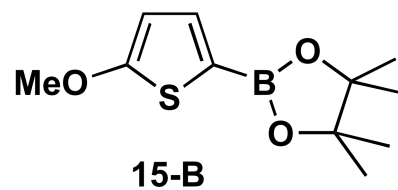

X : parts per Million : Proton

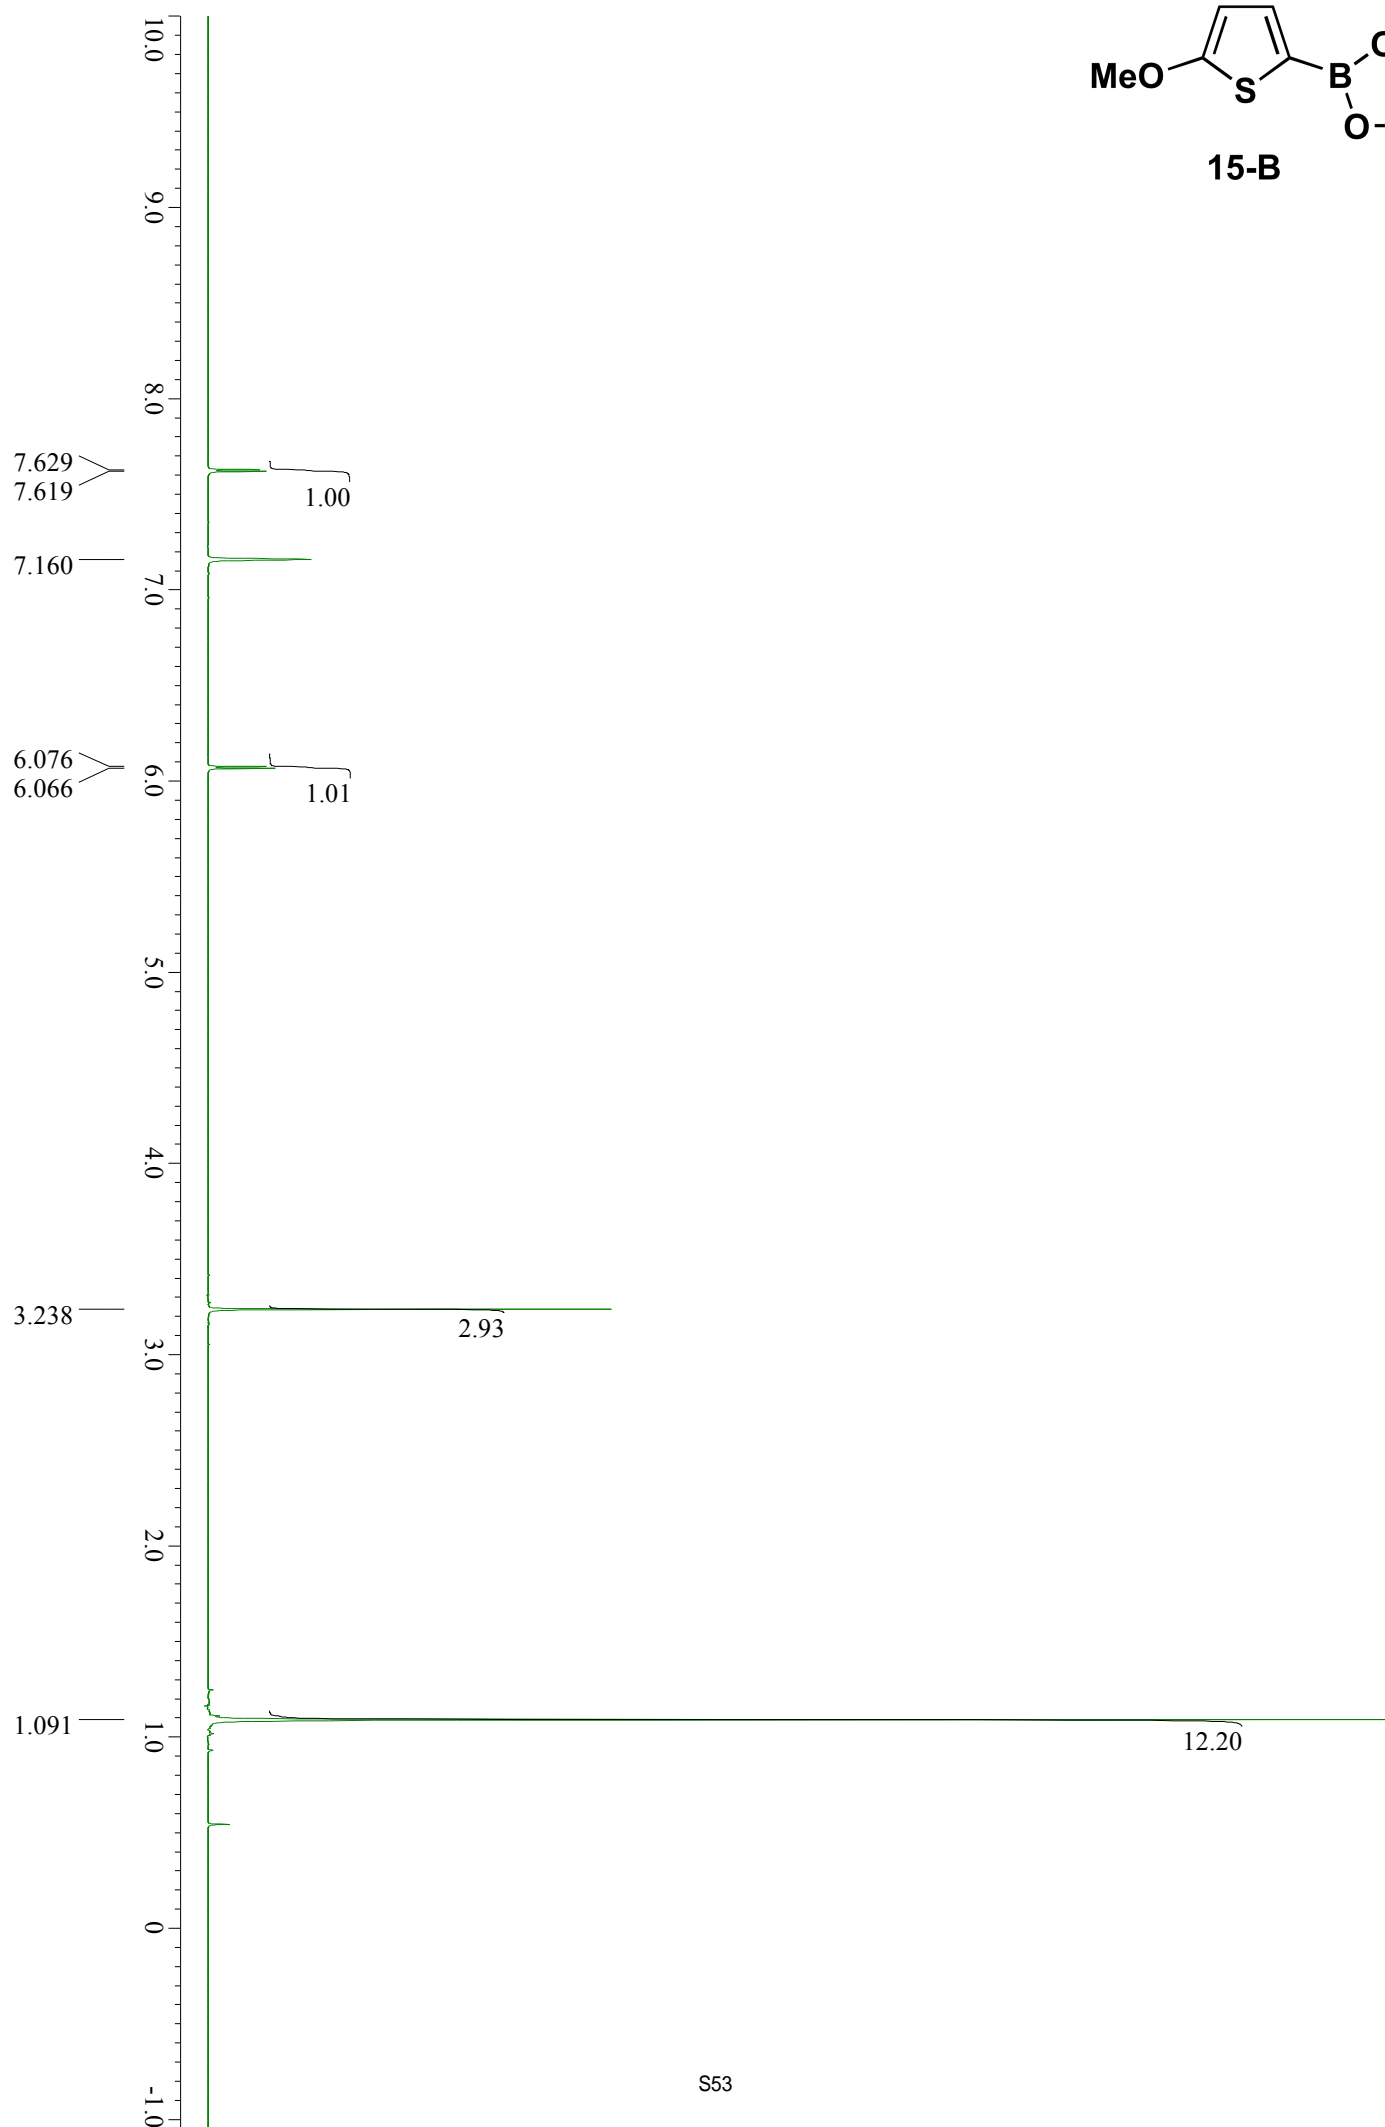

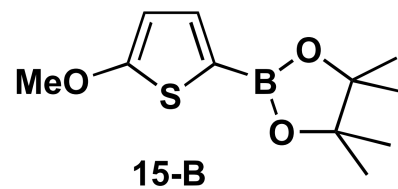

X : parts per Million : Carbon13

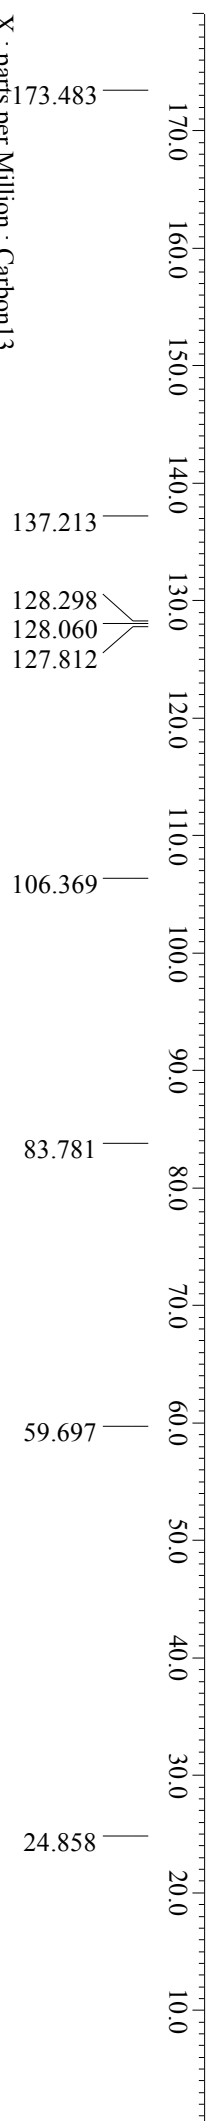

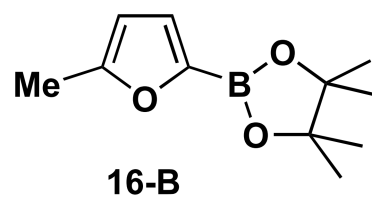

X : parts per Million : Proton

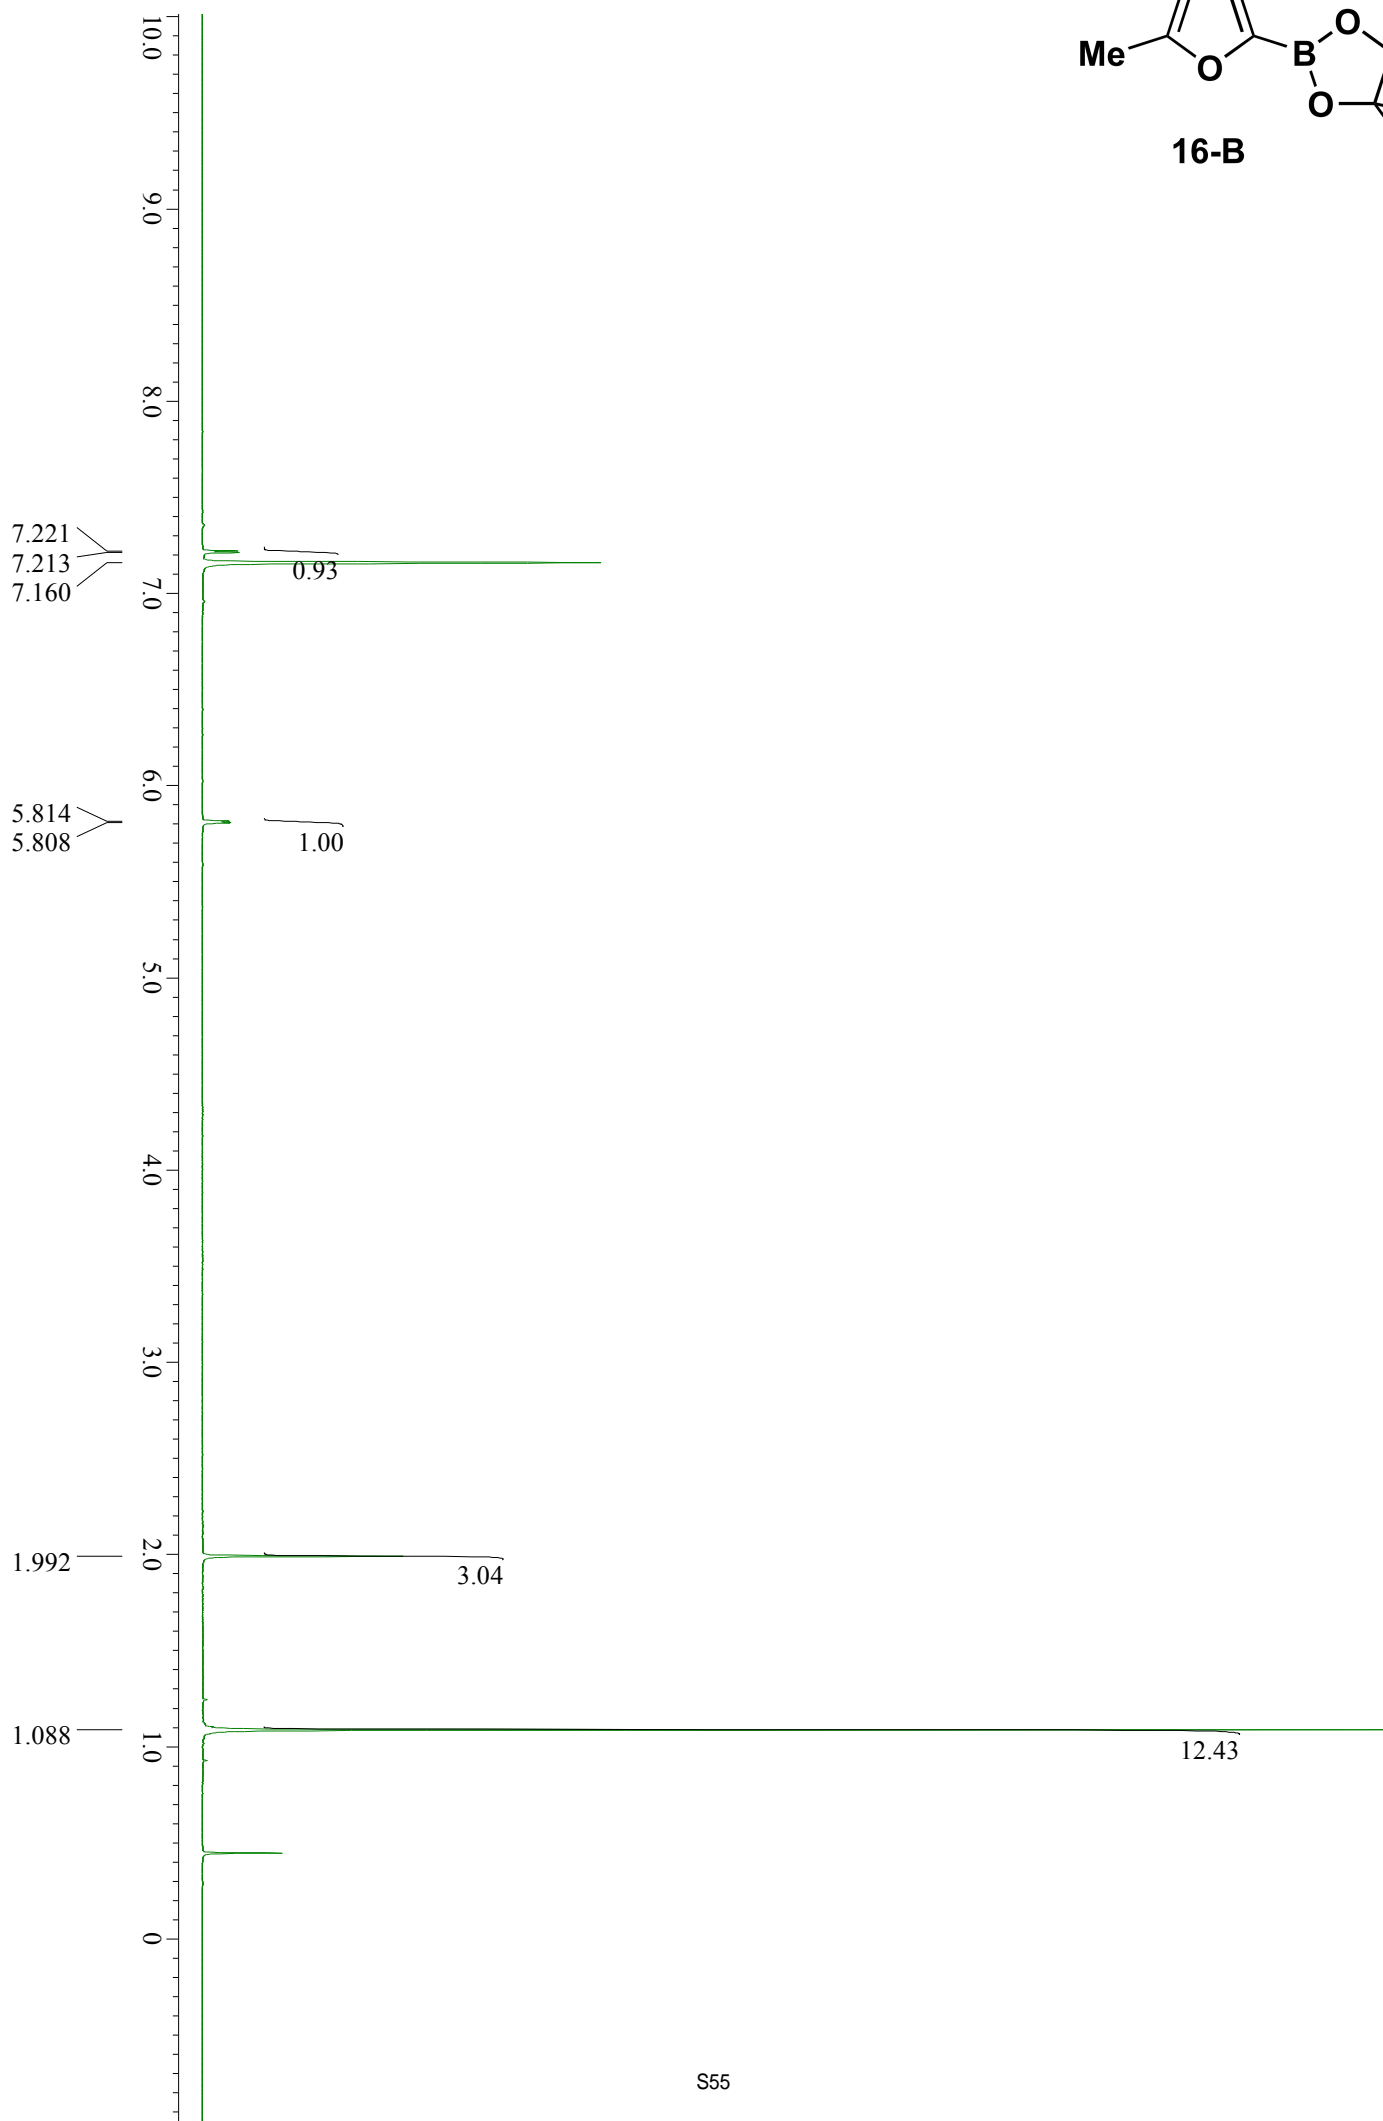

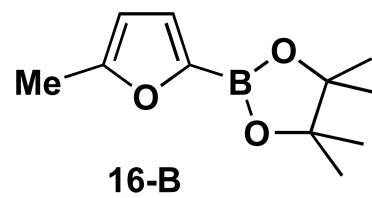

X : parts per Million : Carbon13

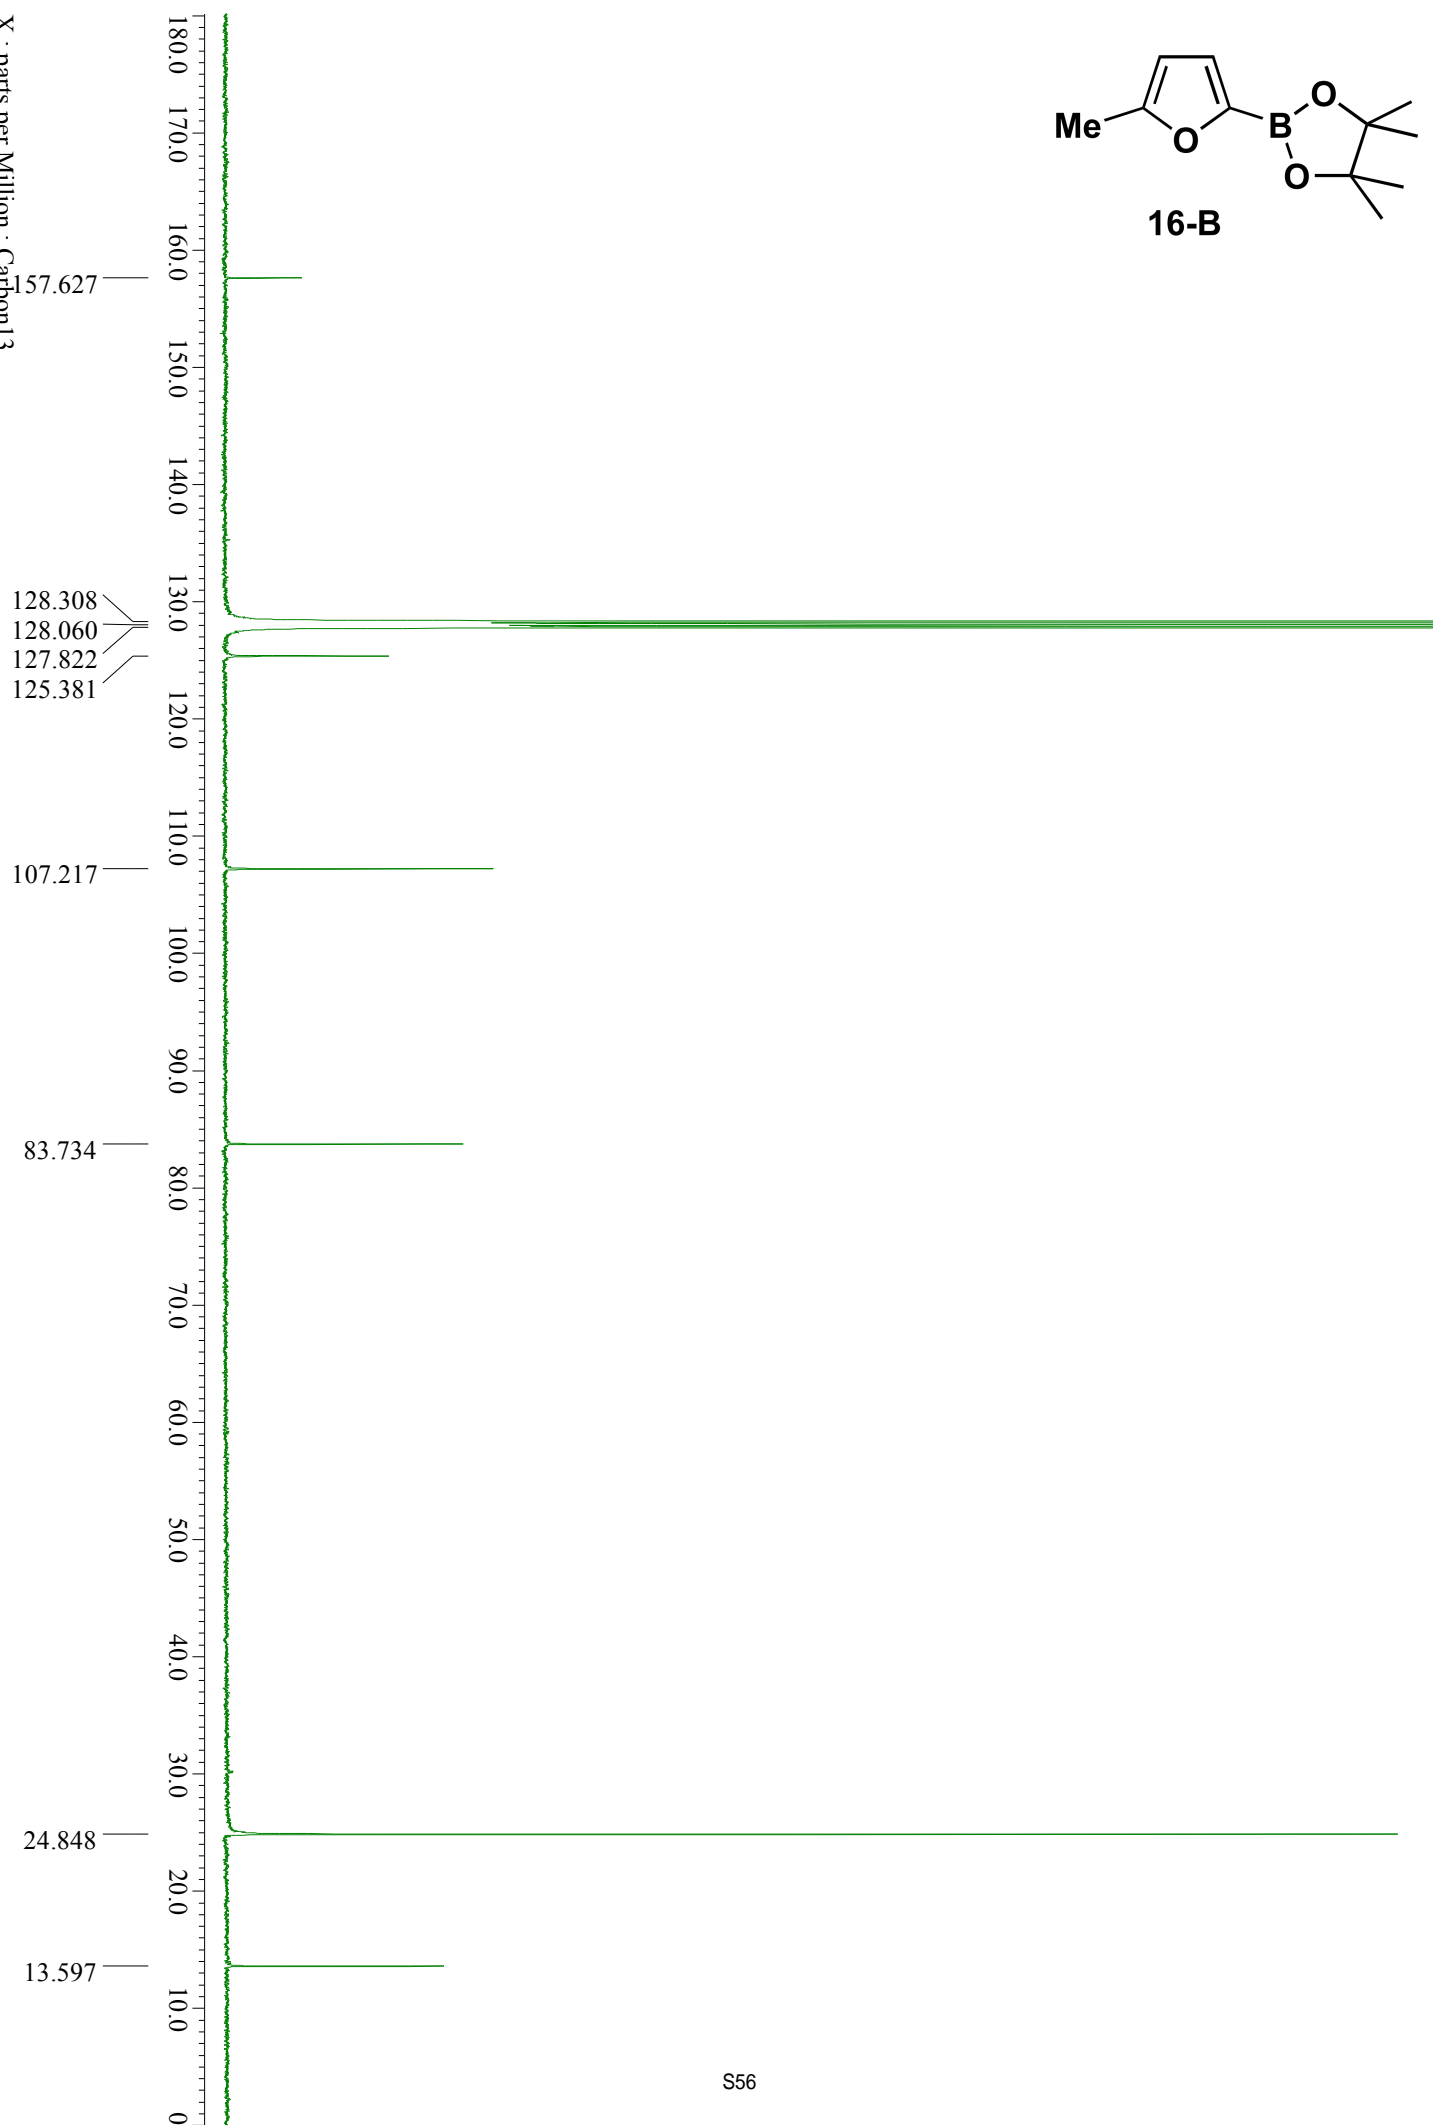



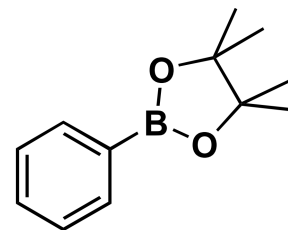

**17-B**  
in C<sub>6</sub>D<sub>6</sub>

X : parts per Million : Proton

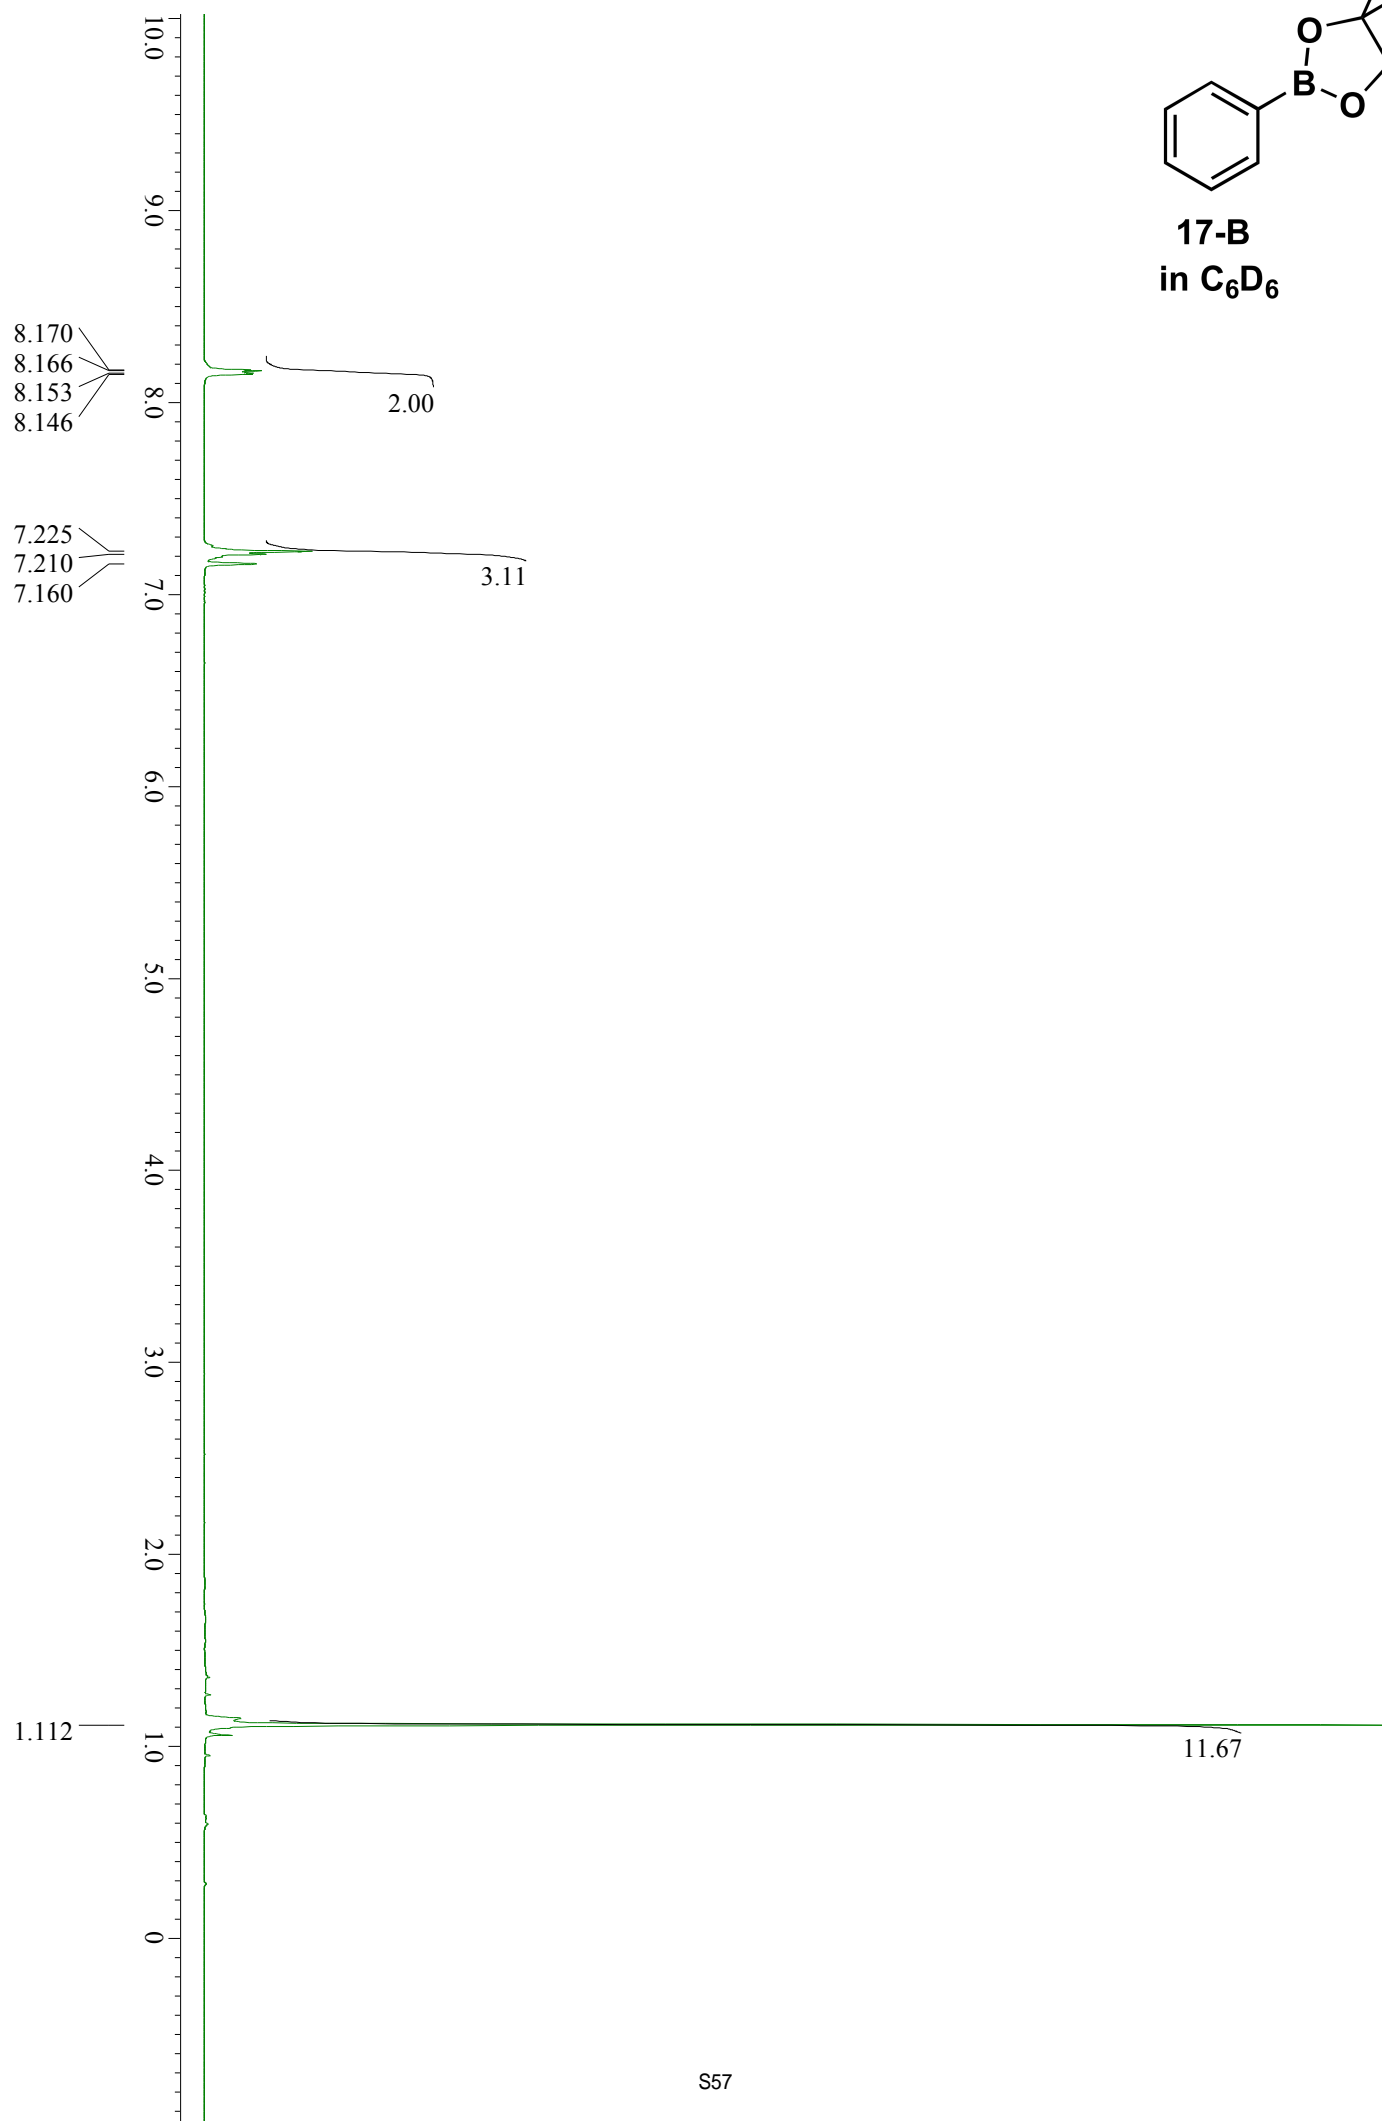

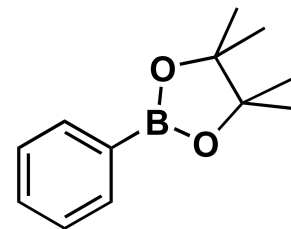

**17-B**  
in CDCl<sub>3</sub>

X : parts per Million : Proton

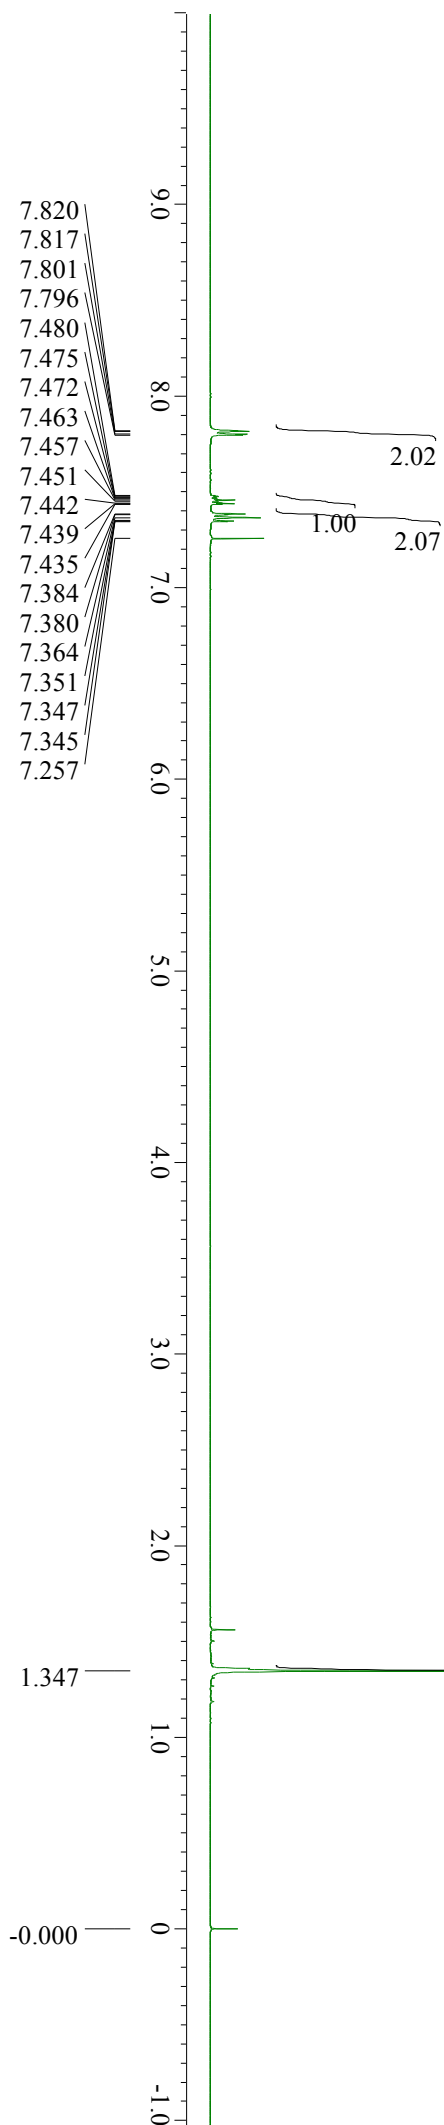

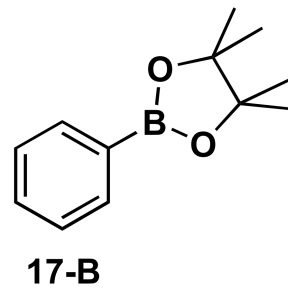

X : parts per Million : Carbon13

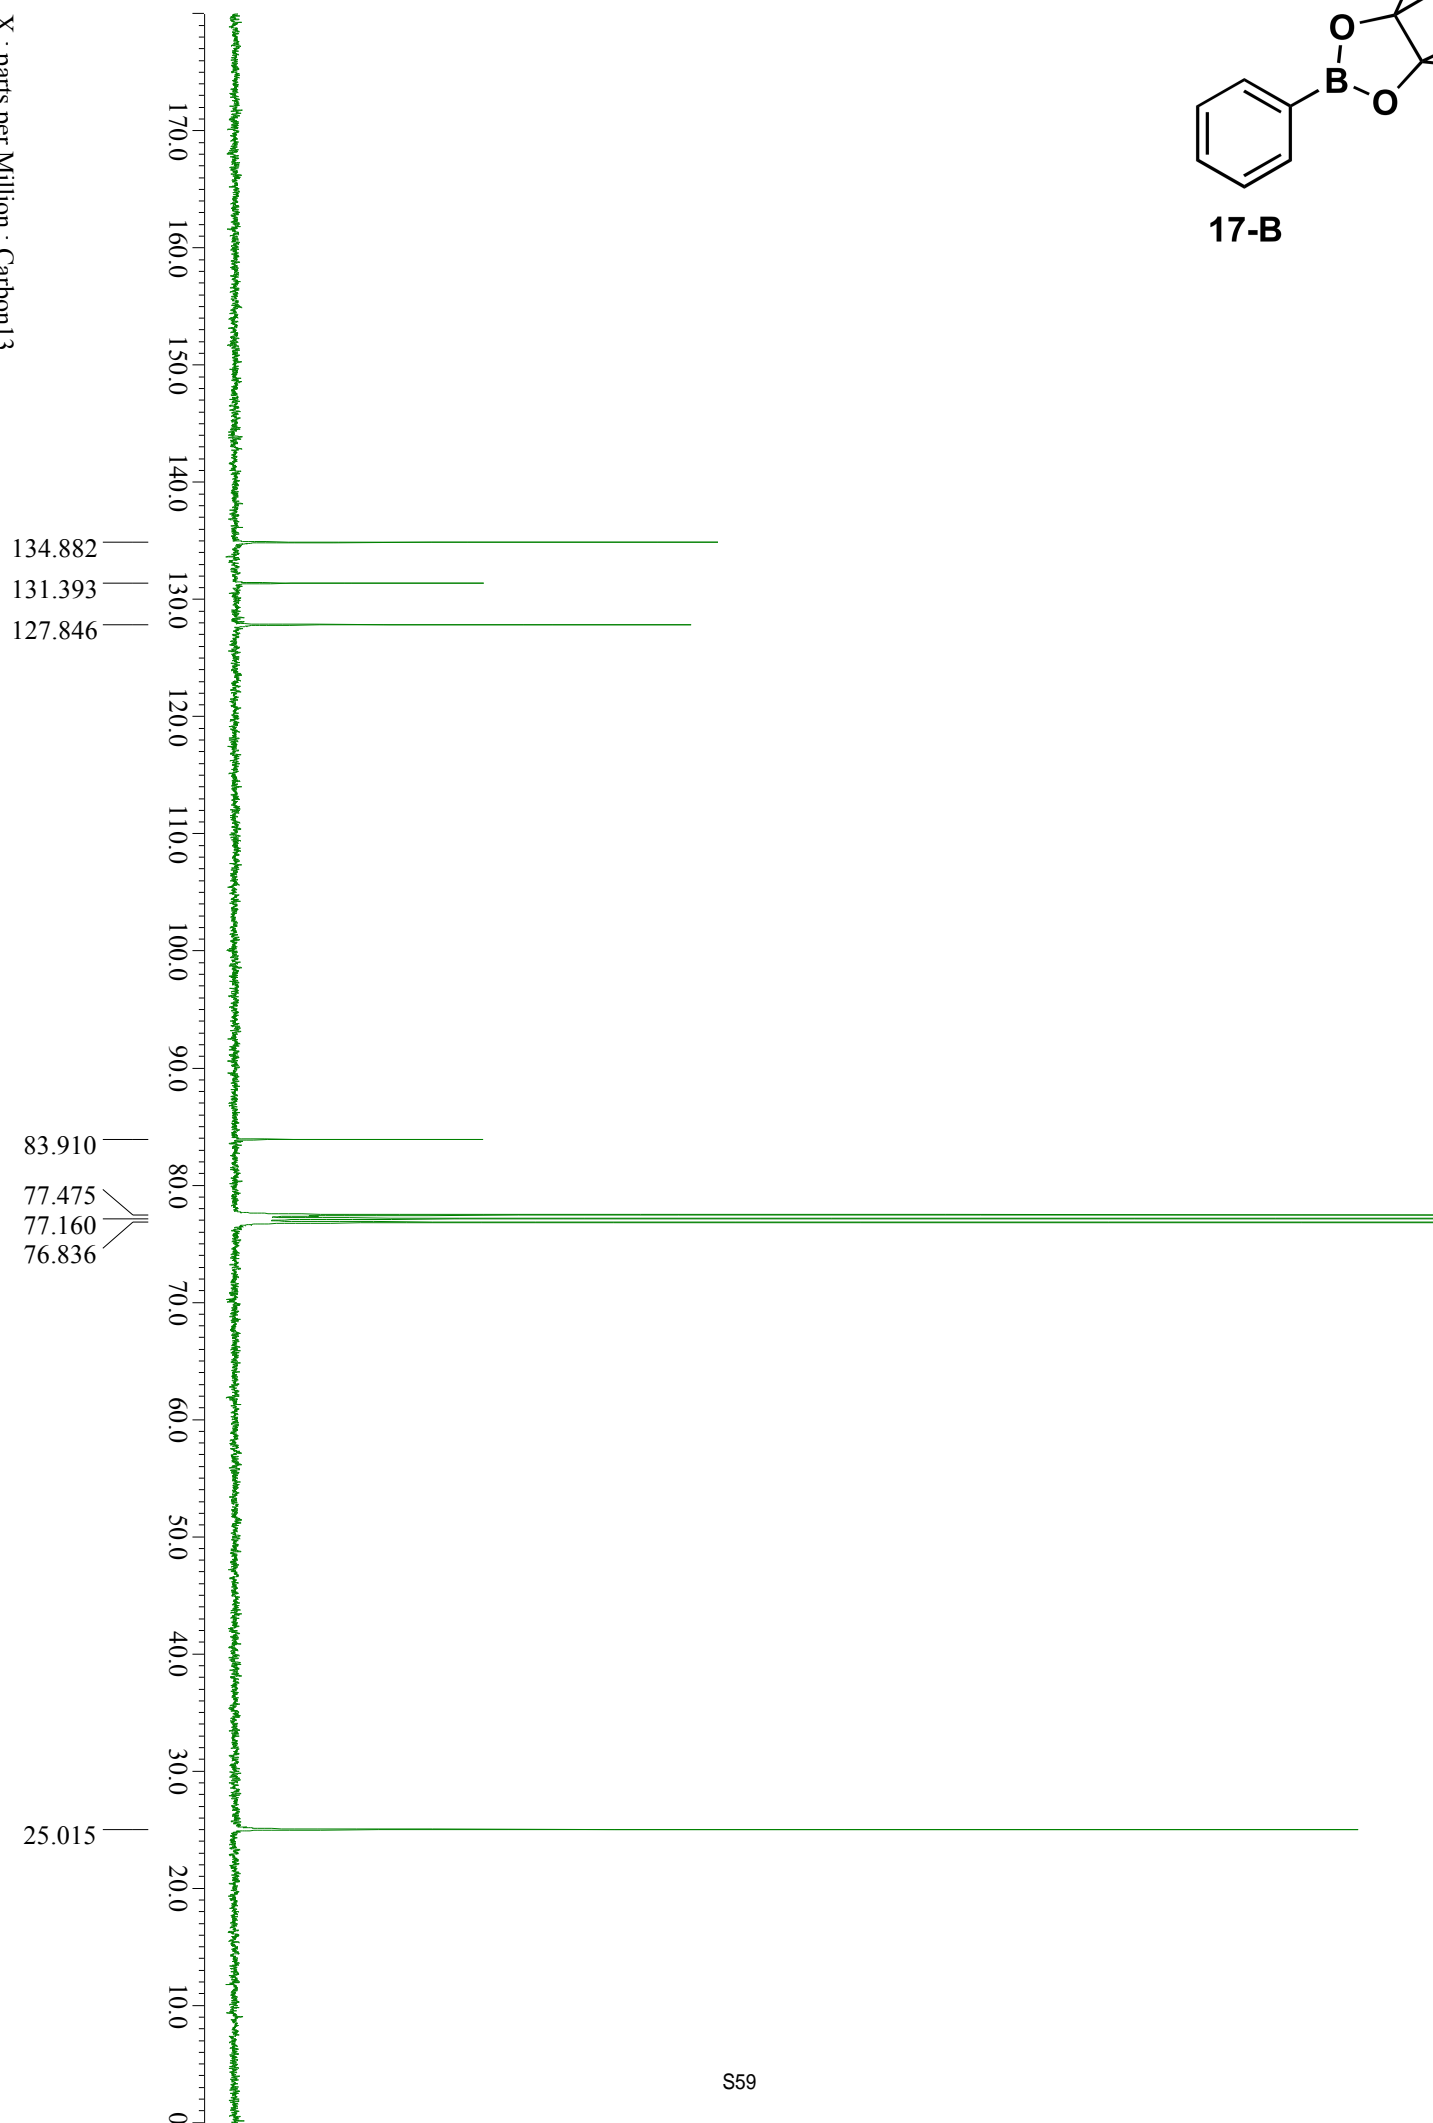

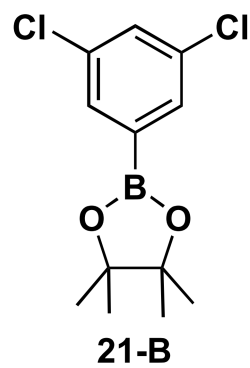

X : parts per Million : Proton

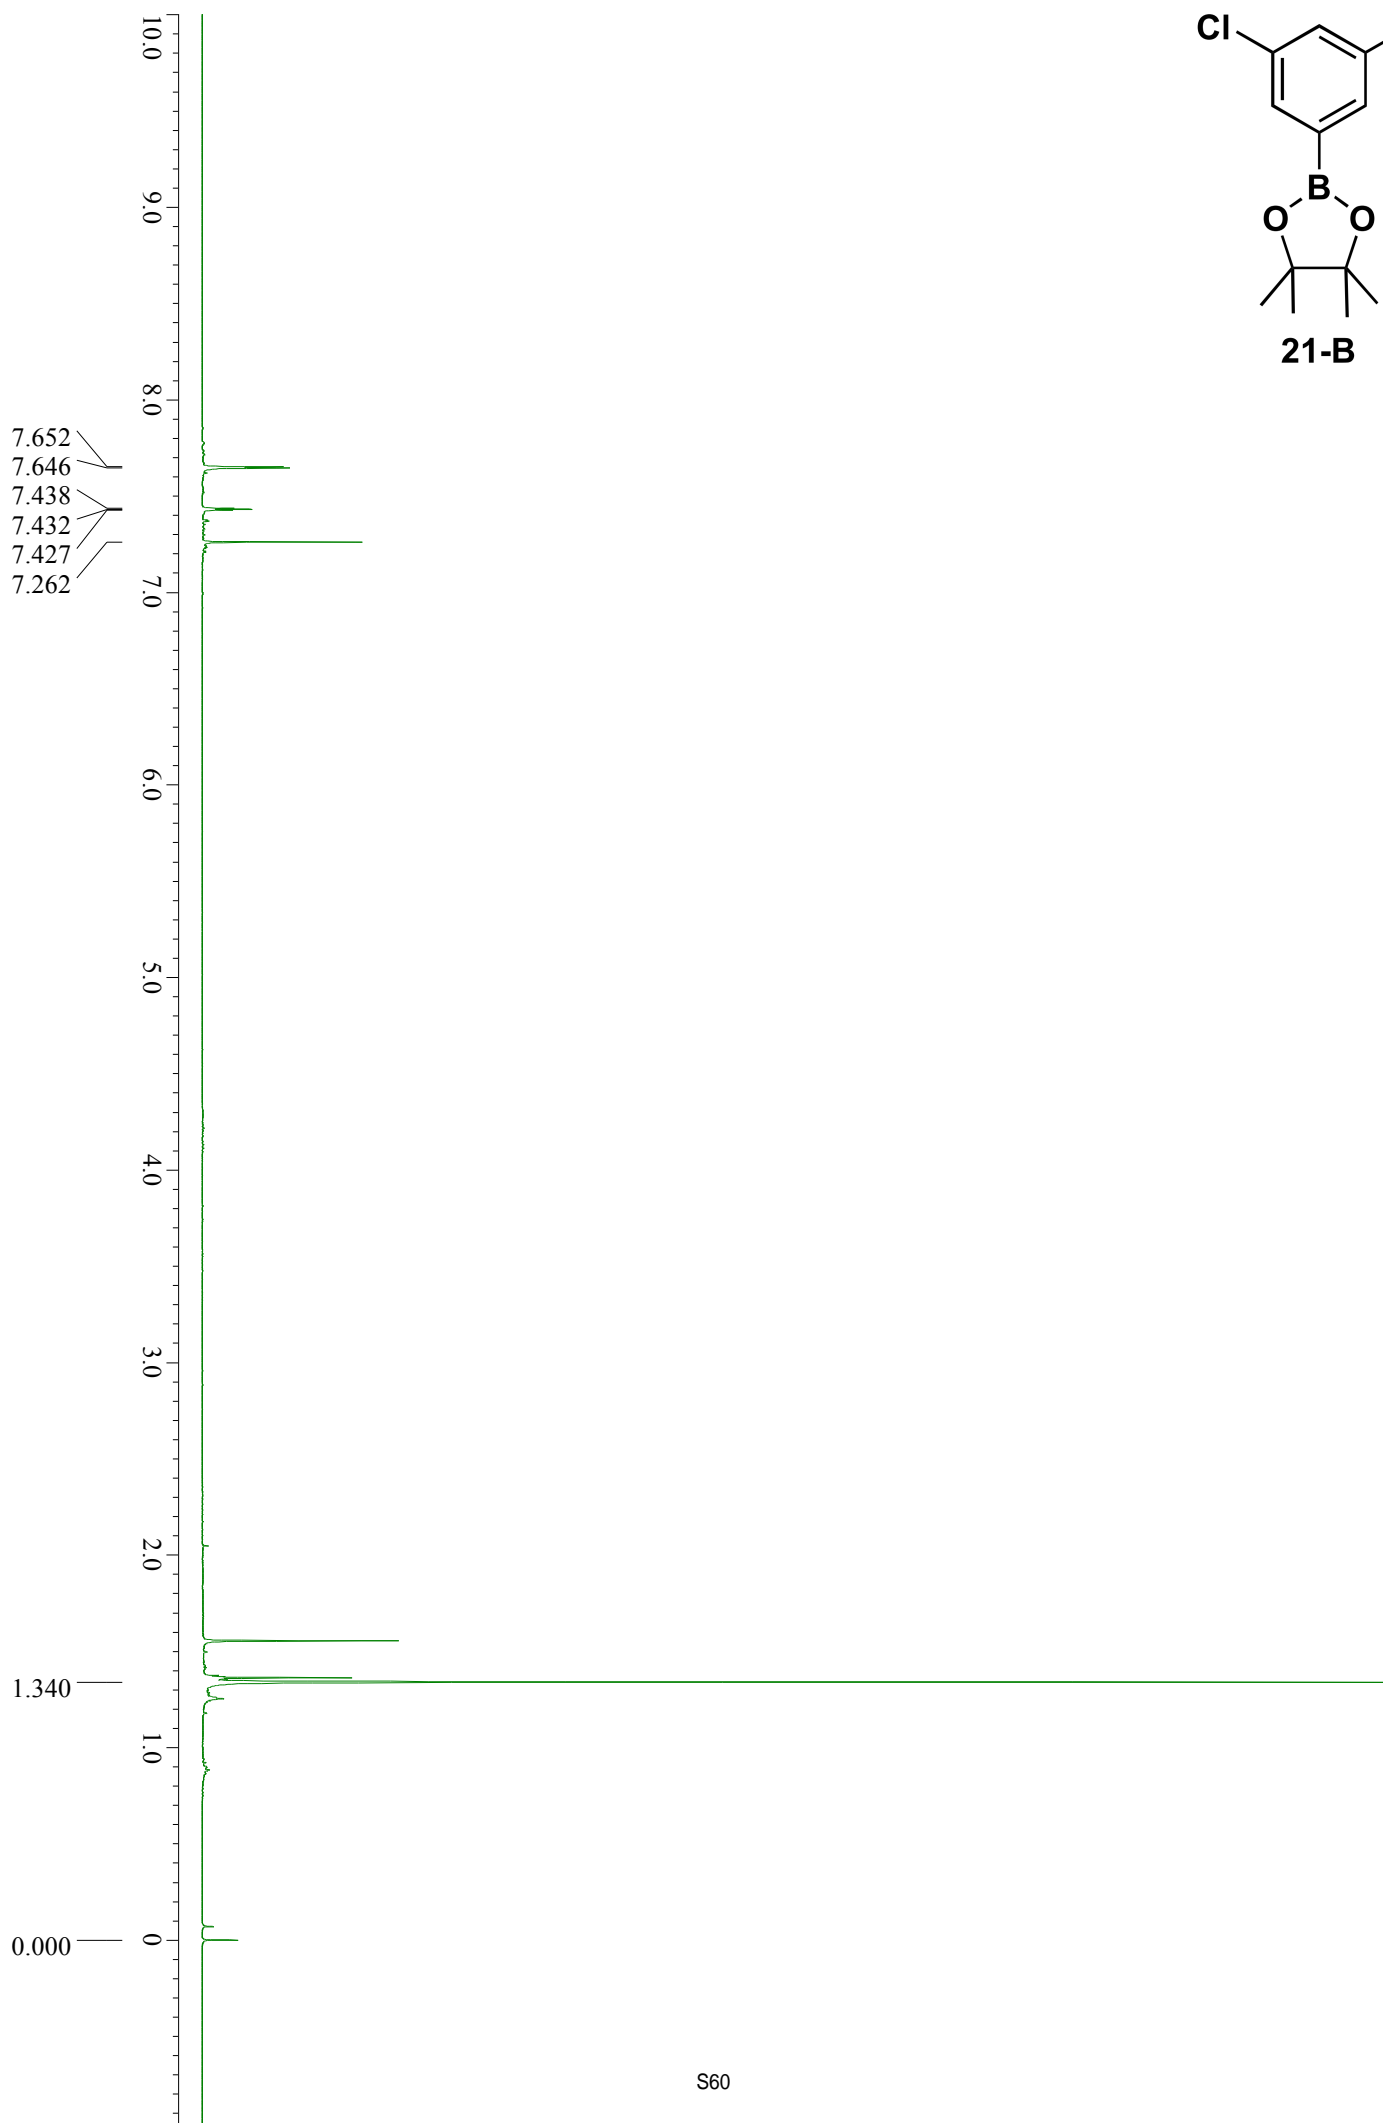

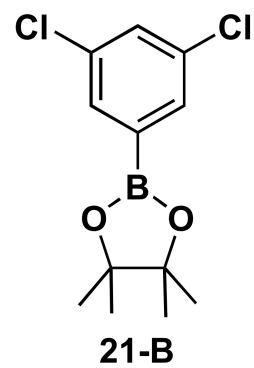

X : parts per Million : Carbon13

134.863  
132.851  
131.240

84.654

77.475  
77.160  
76.845

24.987

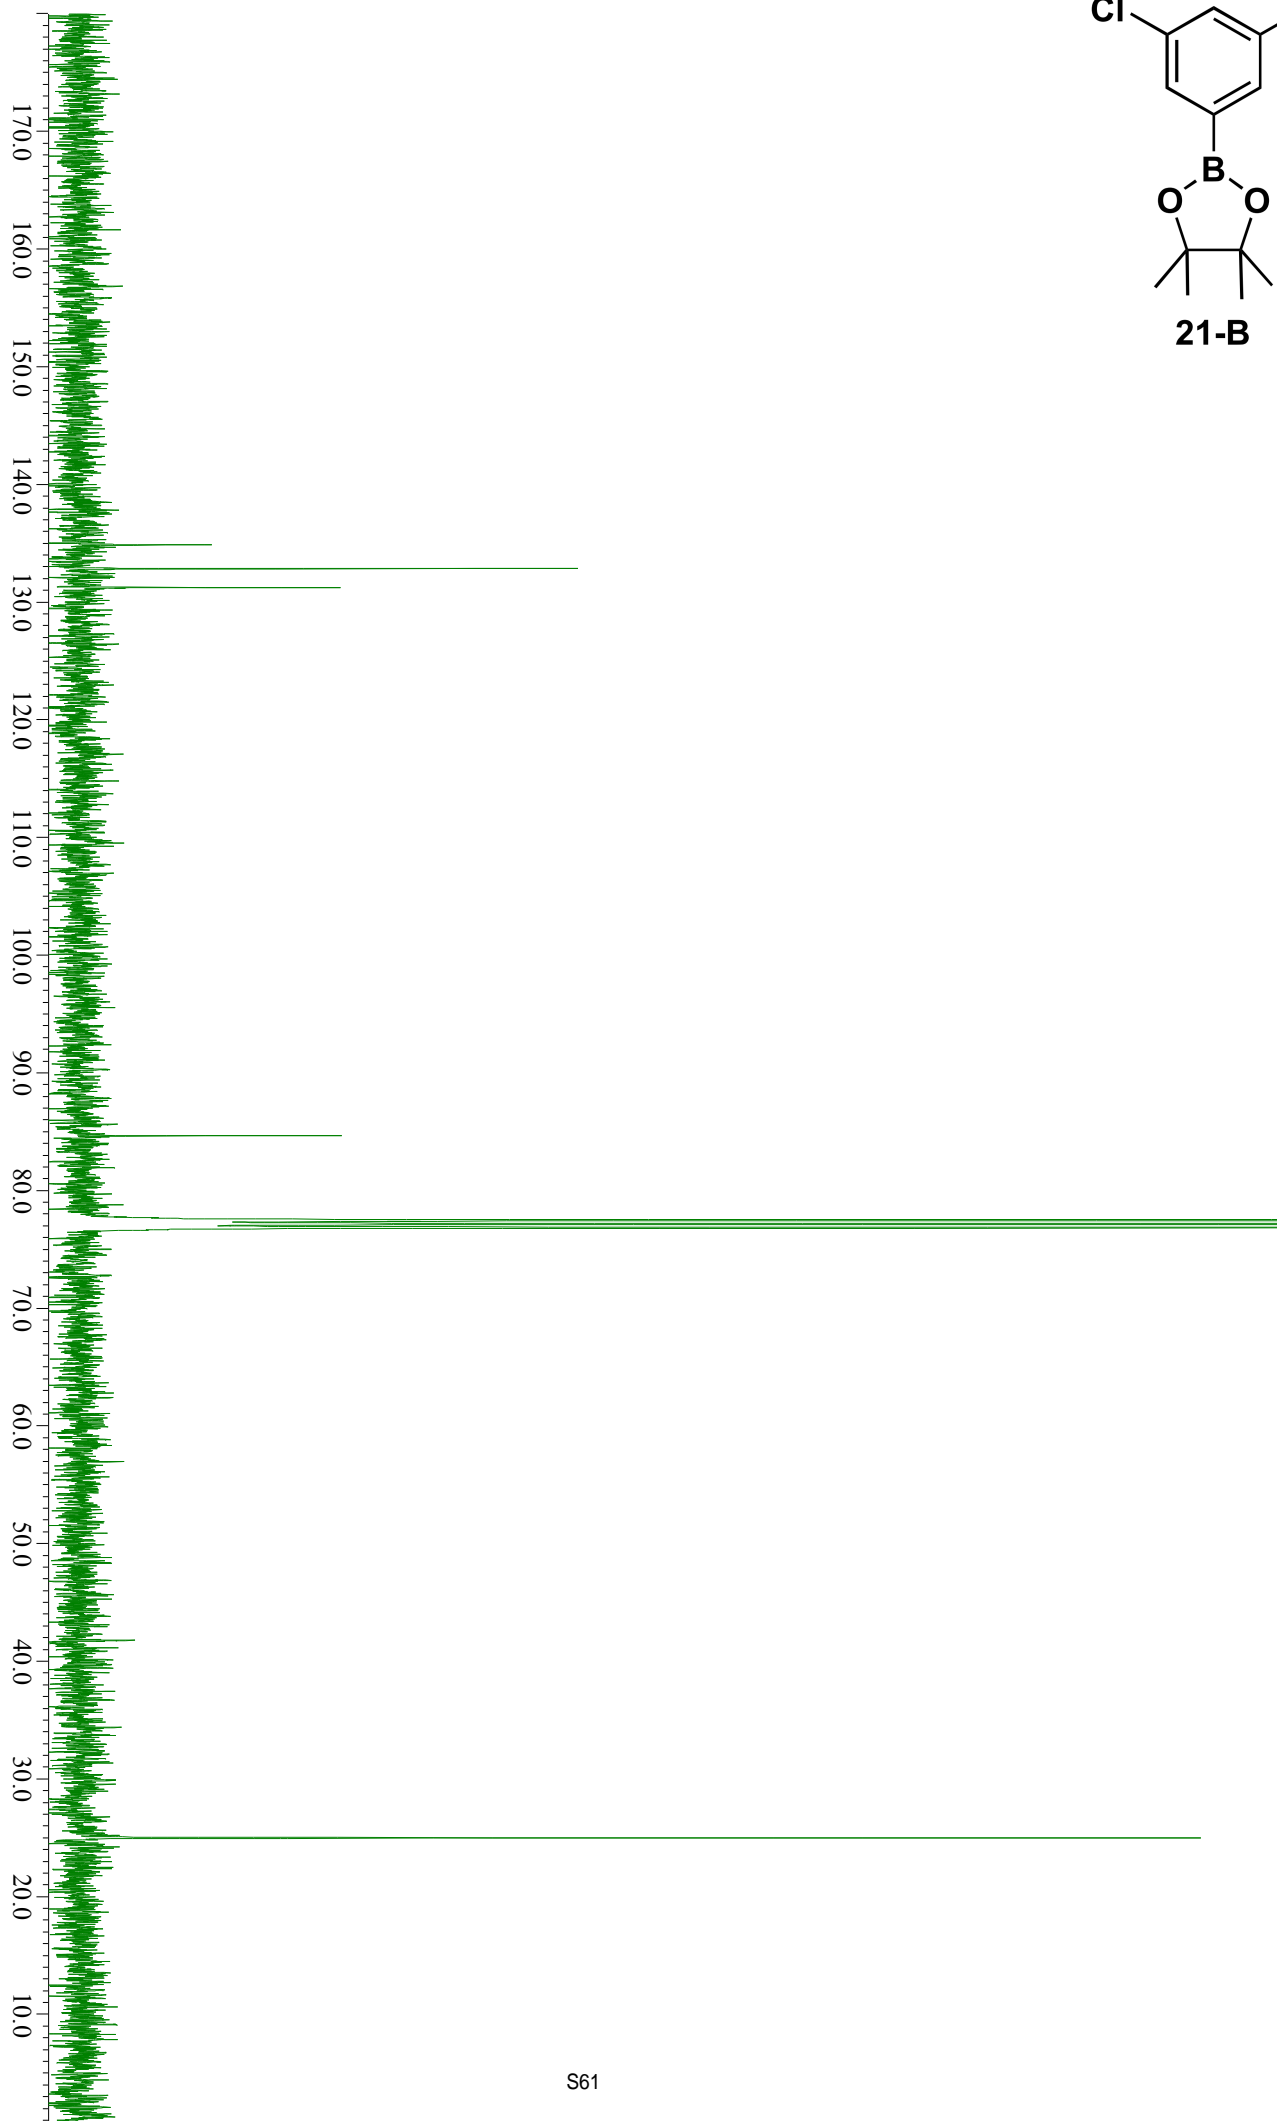

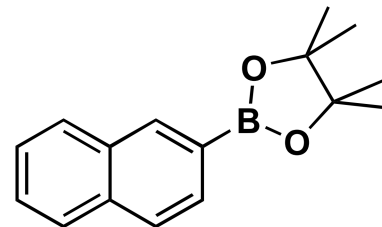

**22-B**  
in C<sub>6</sub>D<sub>6</sub>

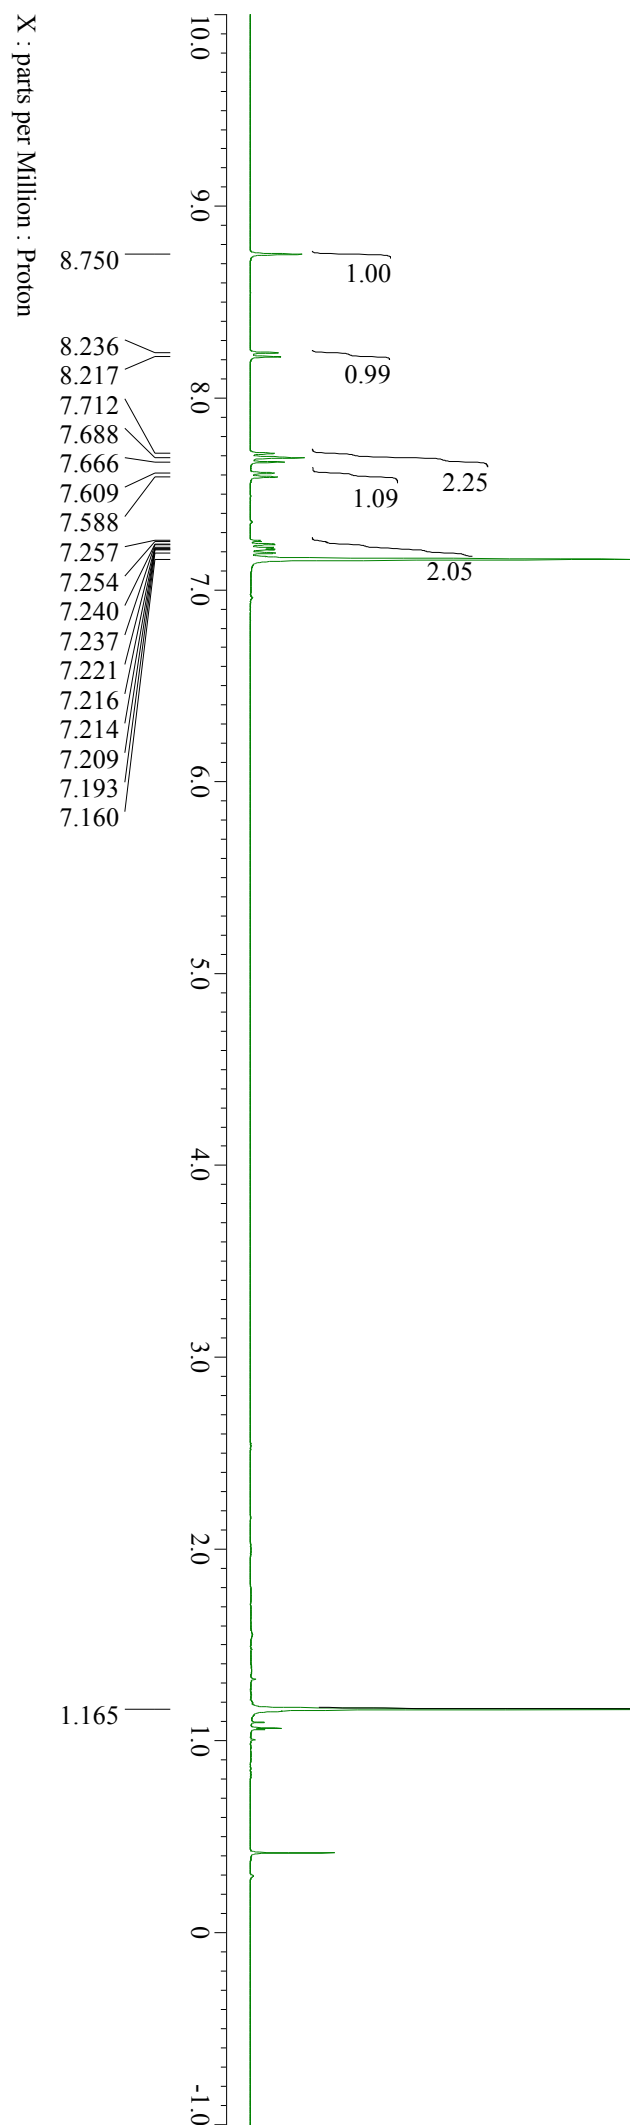

12.52

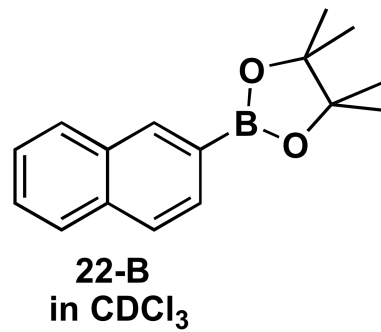

X : parts per Million : Proton

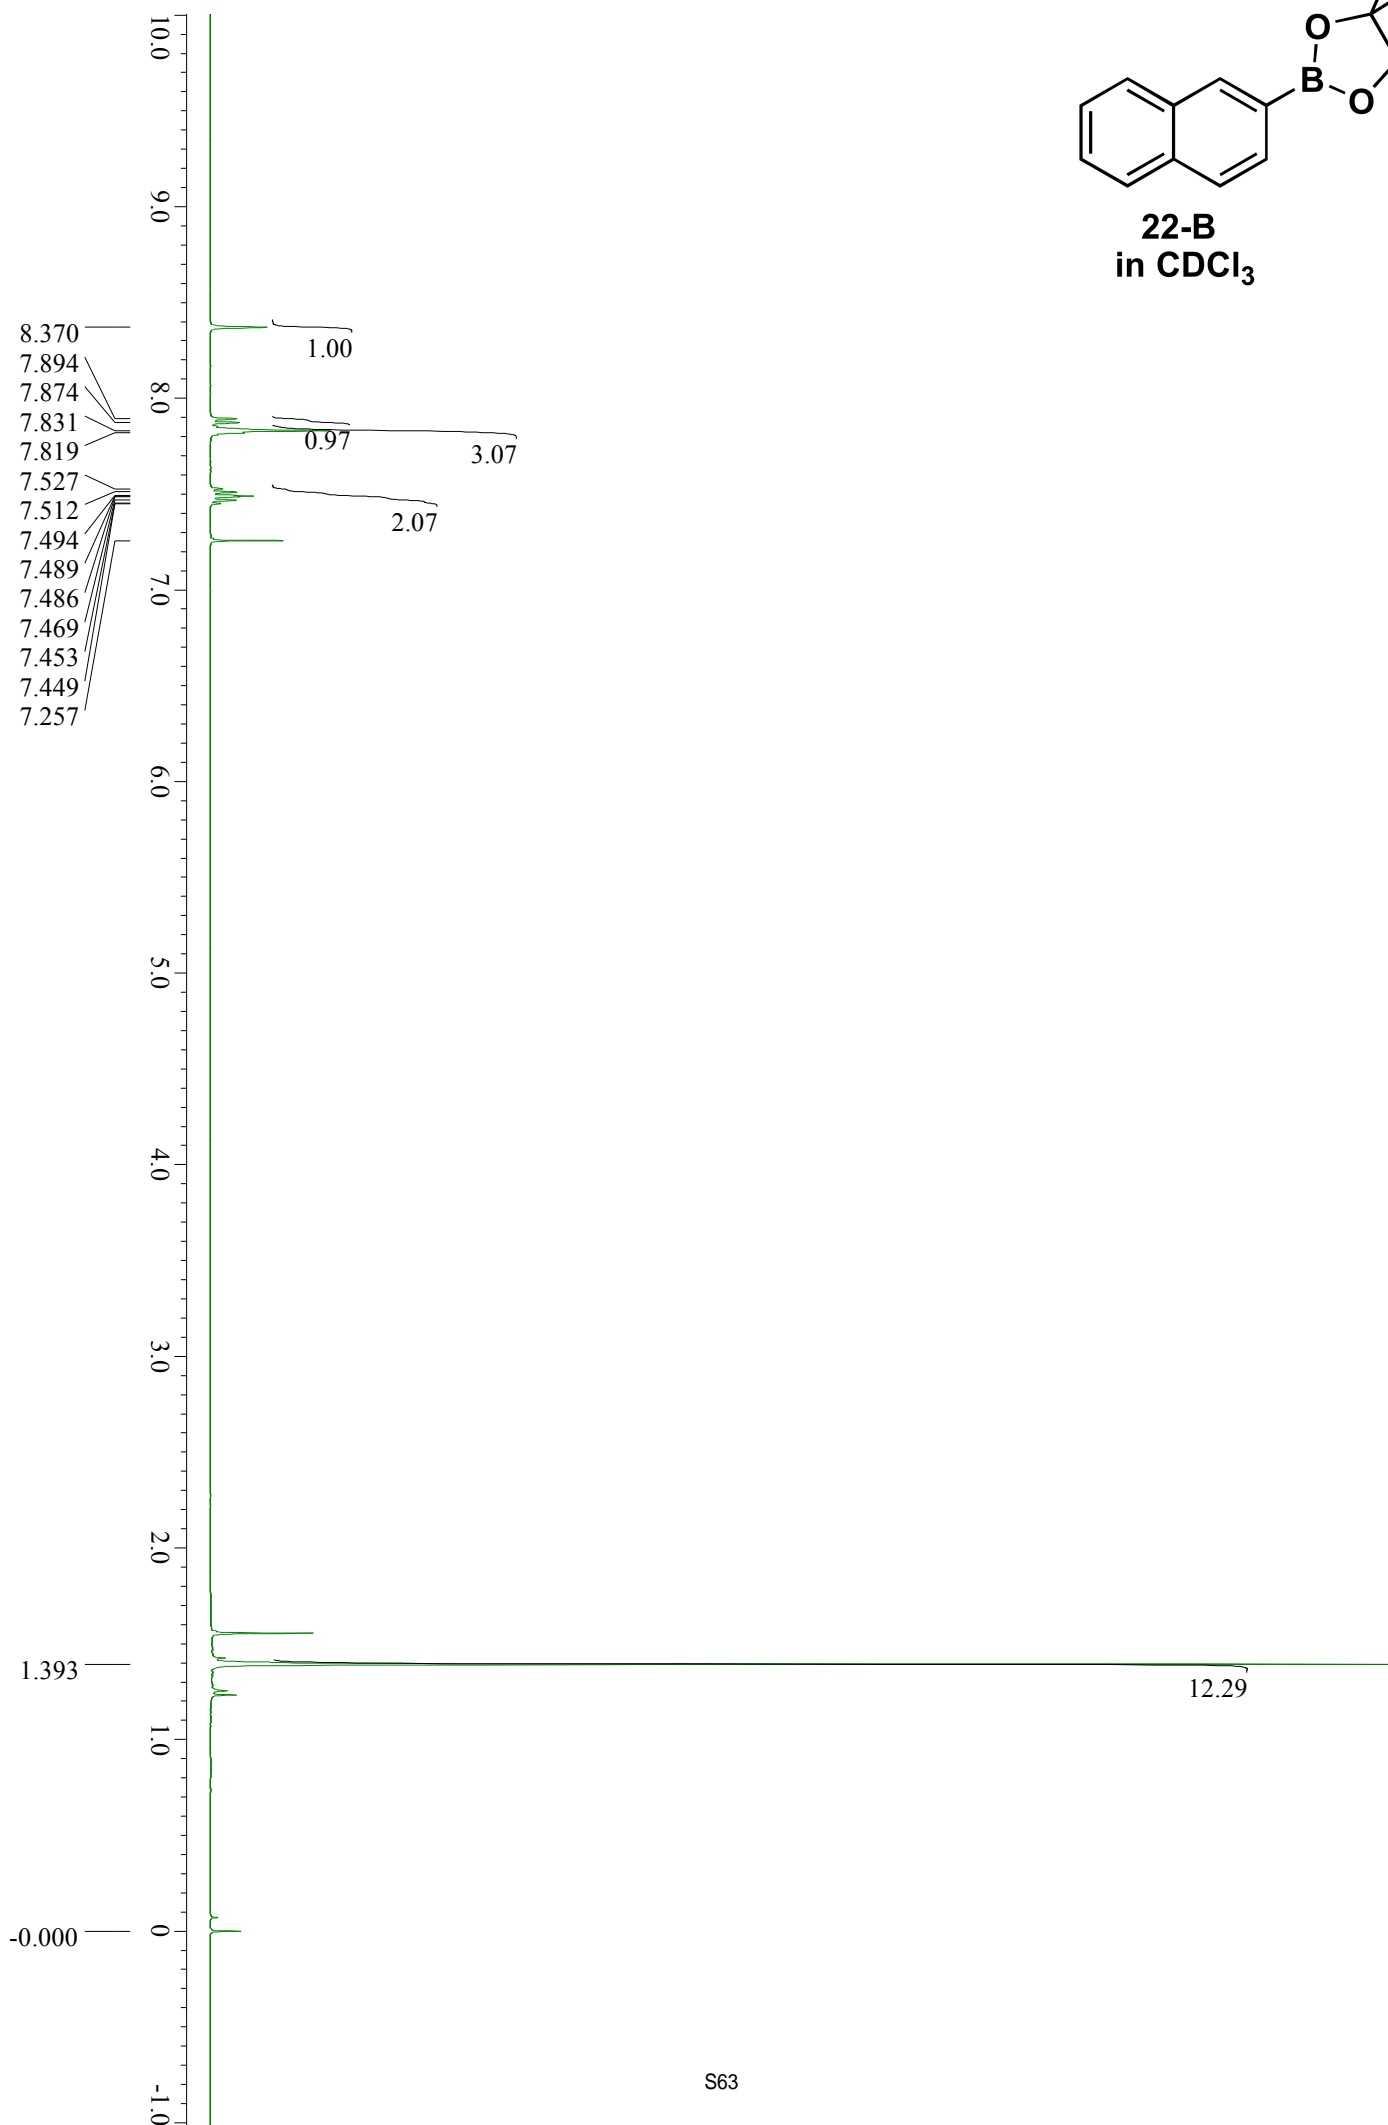

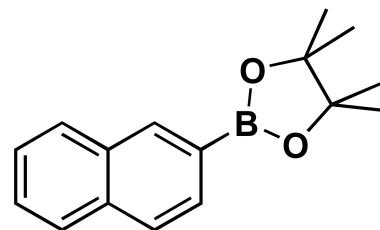

**22-B**

X : parts per Million : Carbon13

136.317  
135.106  
132.885  
130.473  
128.737  
127.784  
127.050  
125.867

84.011  
77.413  
77.098  
76.774

25.011

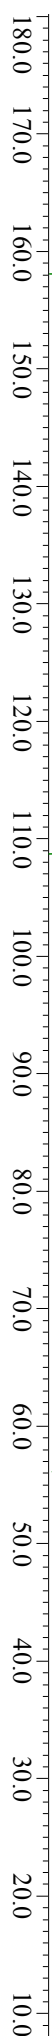



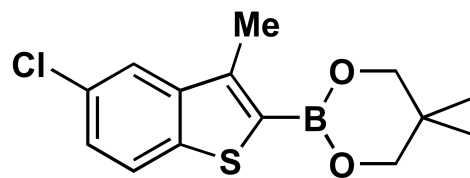

10-Bnep

X : parts per Million : Proton

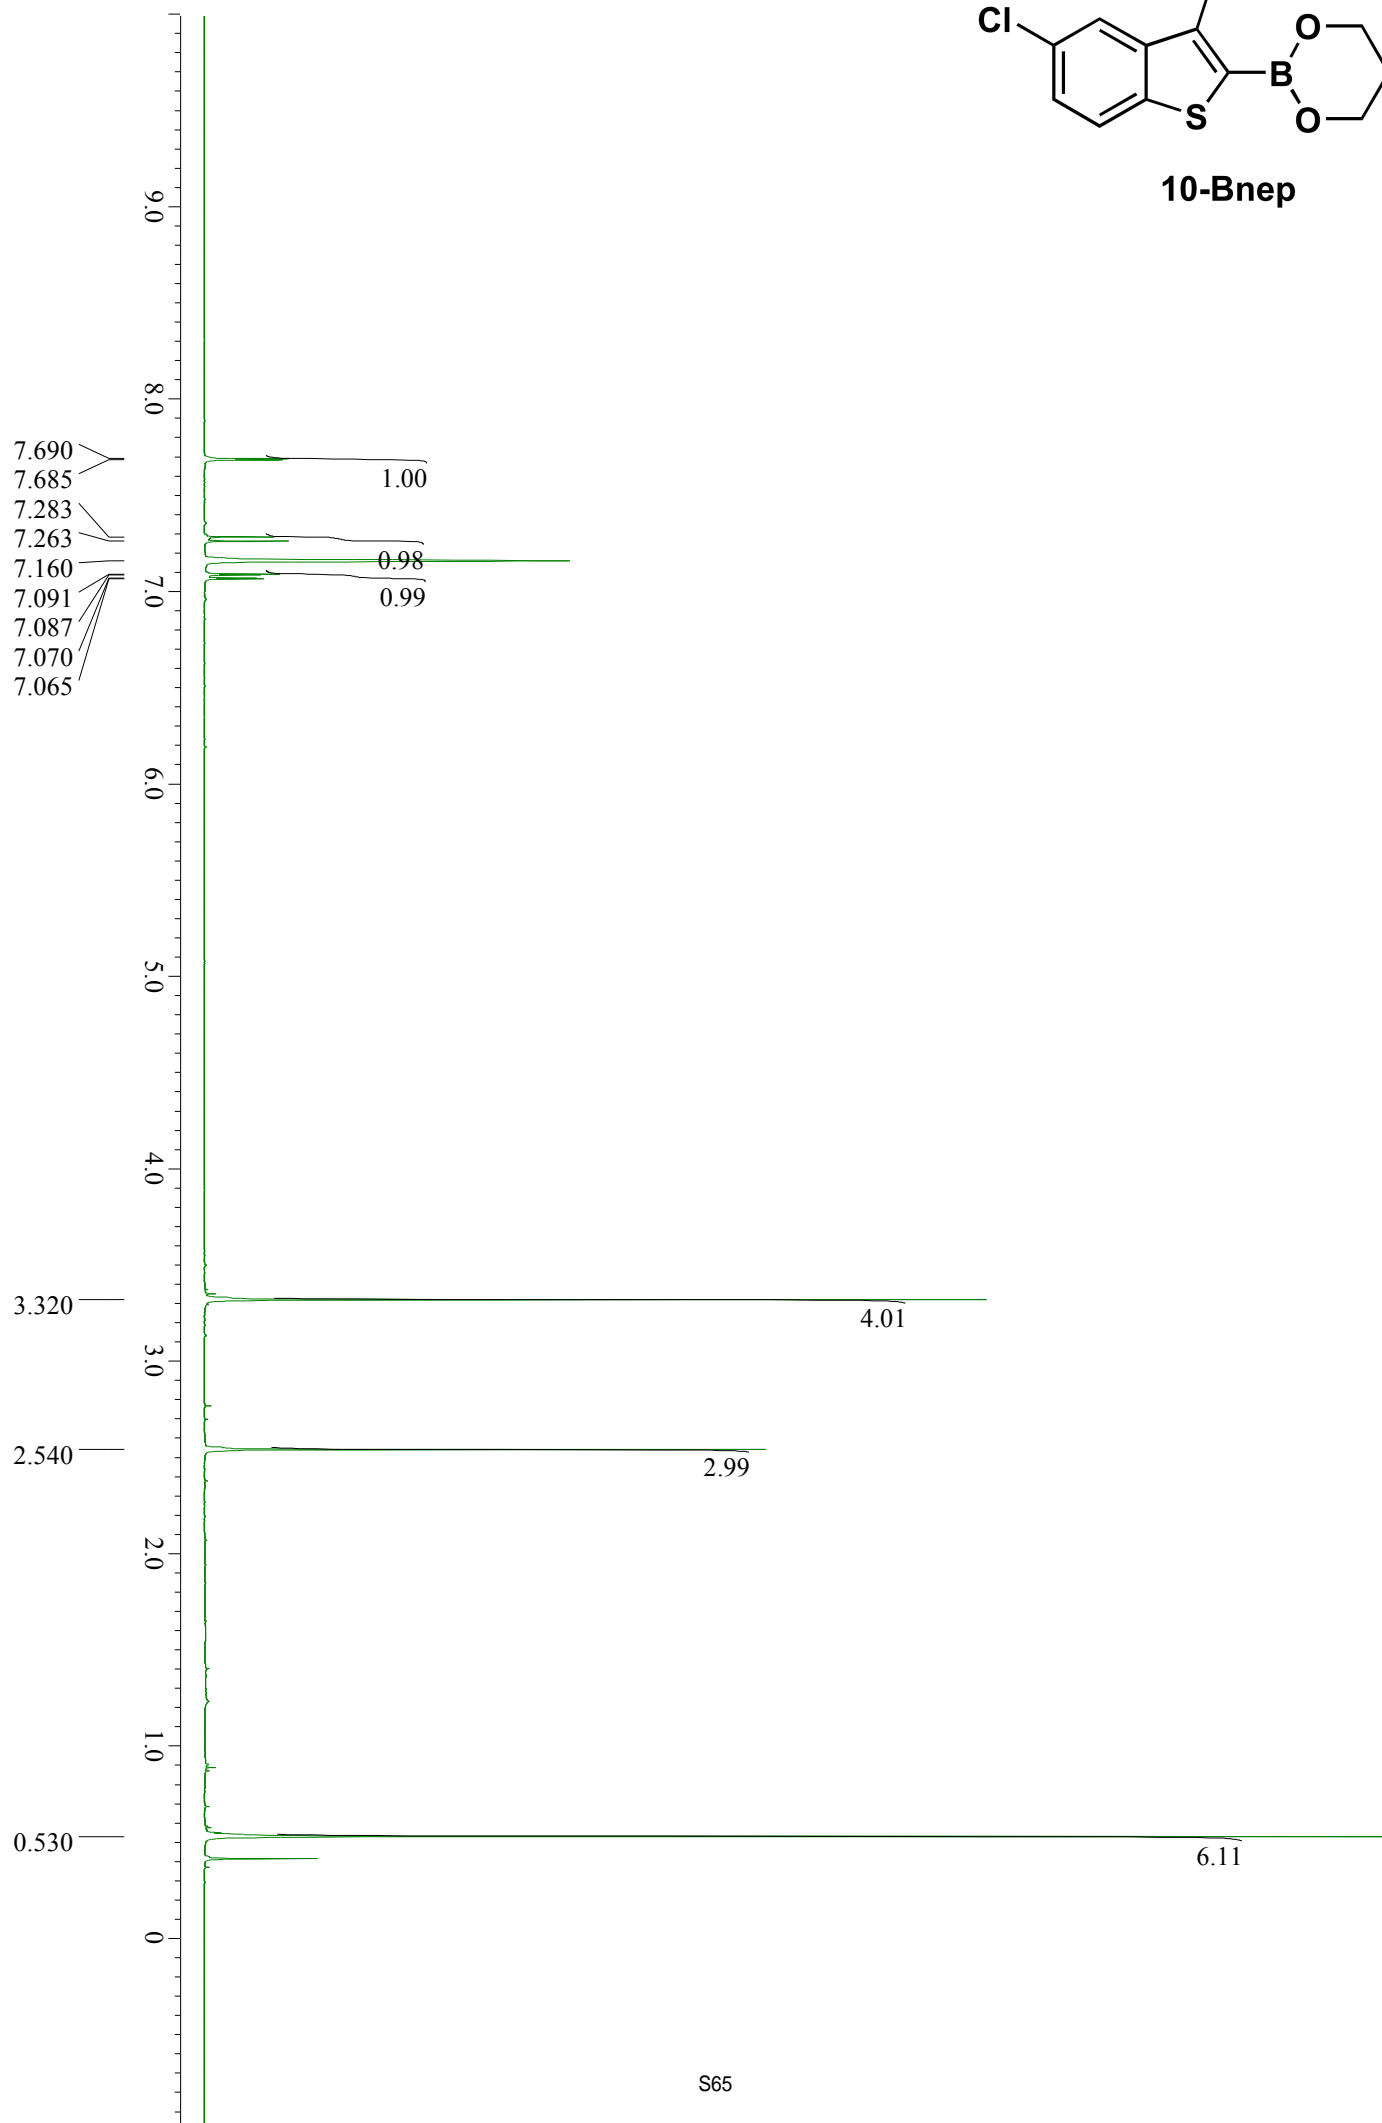

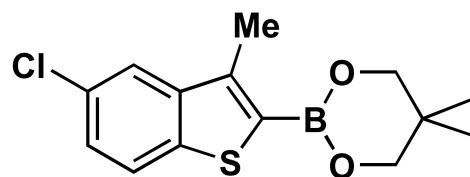

10-Bnep

X : parts per Million : Carbon13

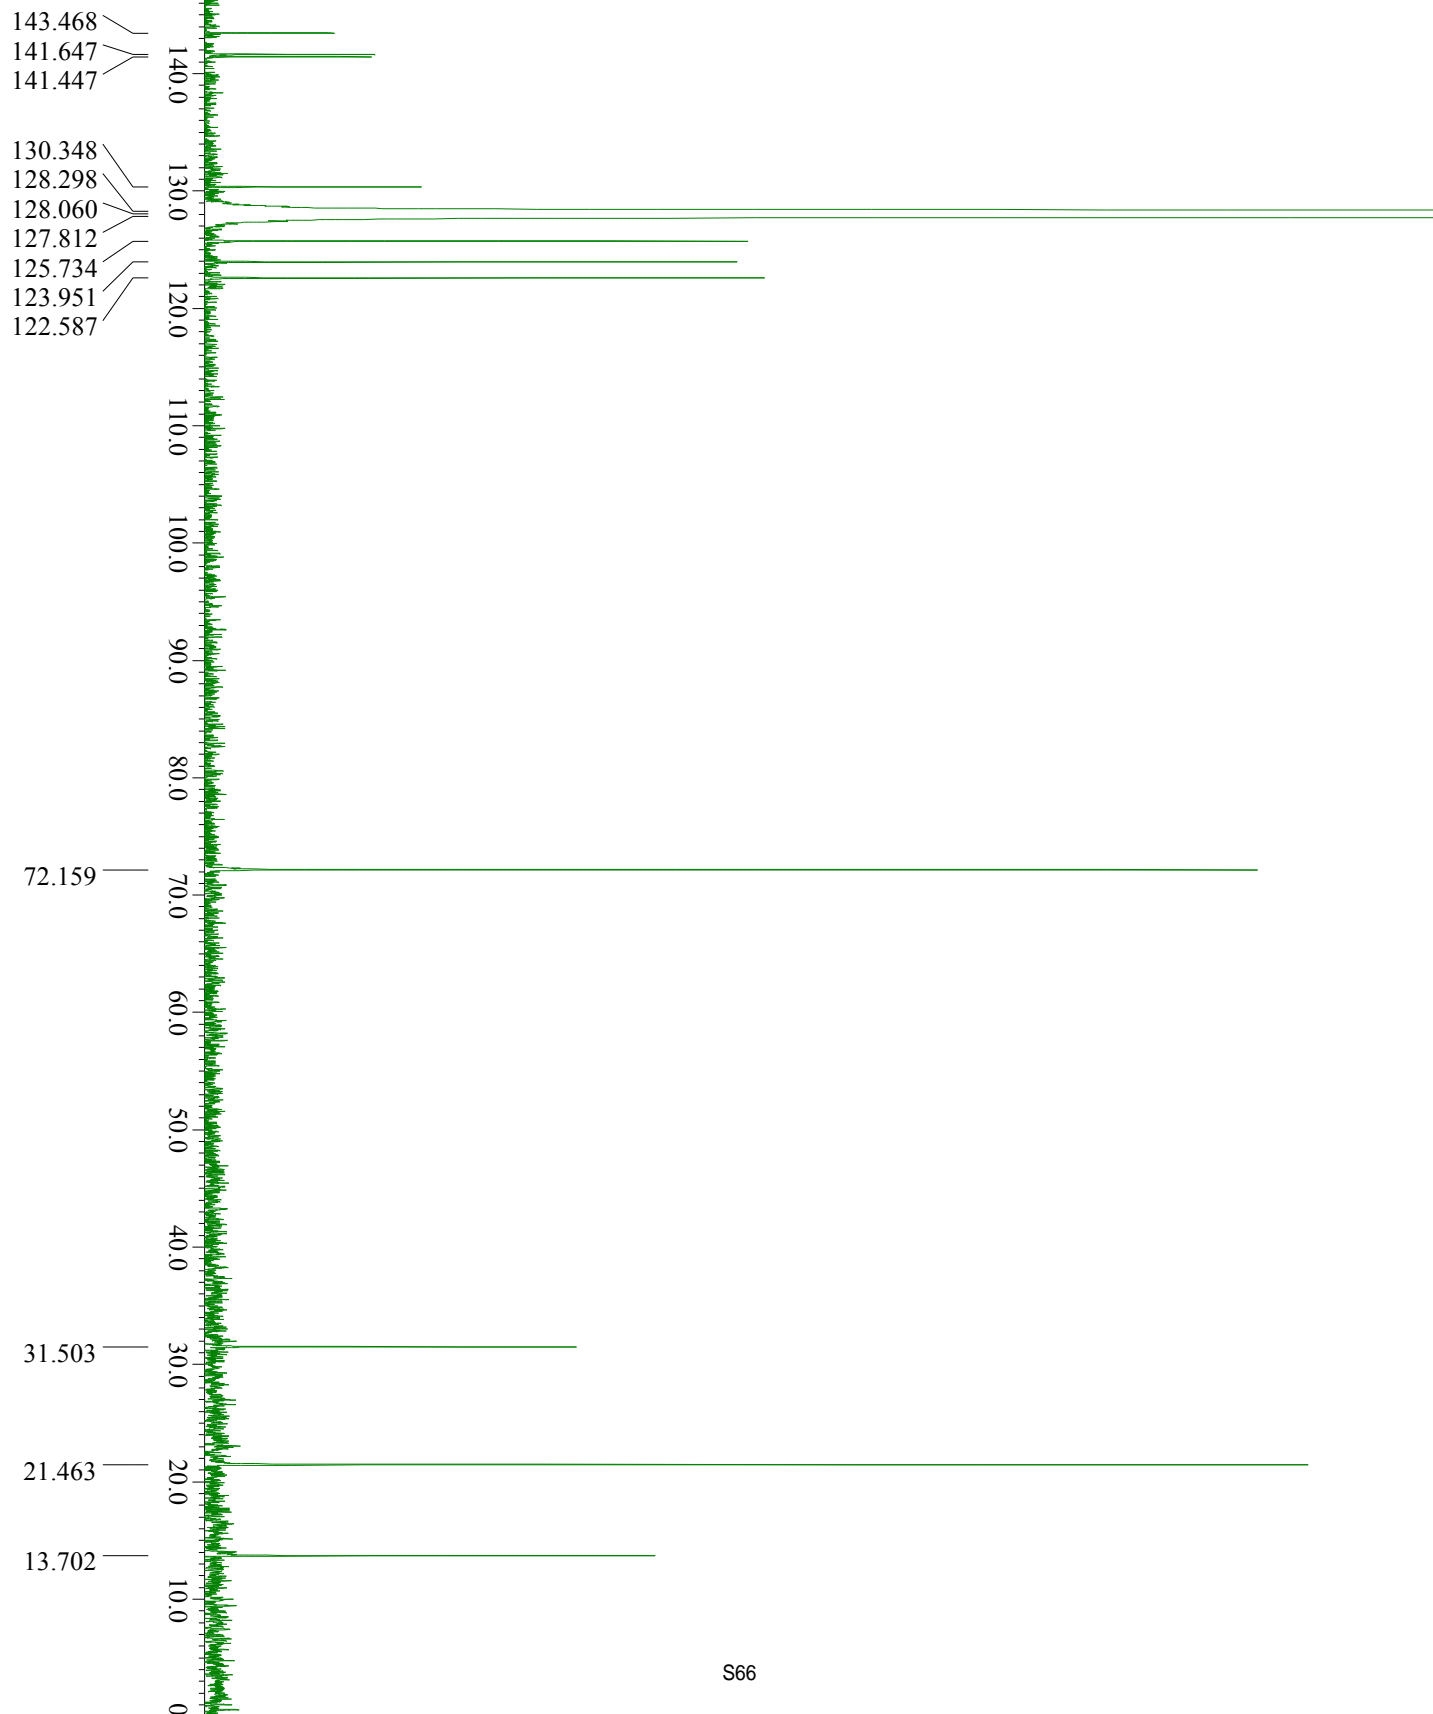

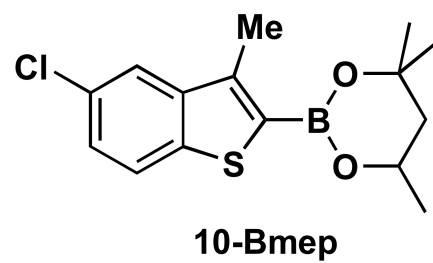

X : parts per Million : Proton

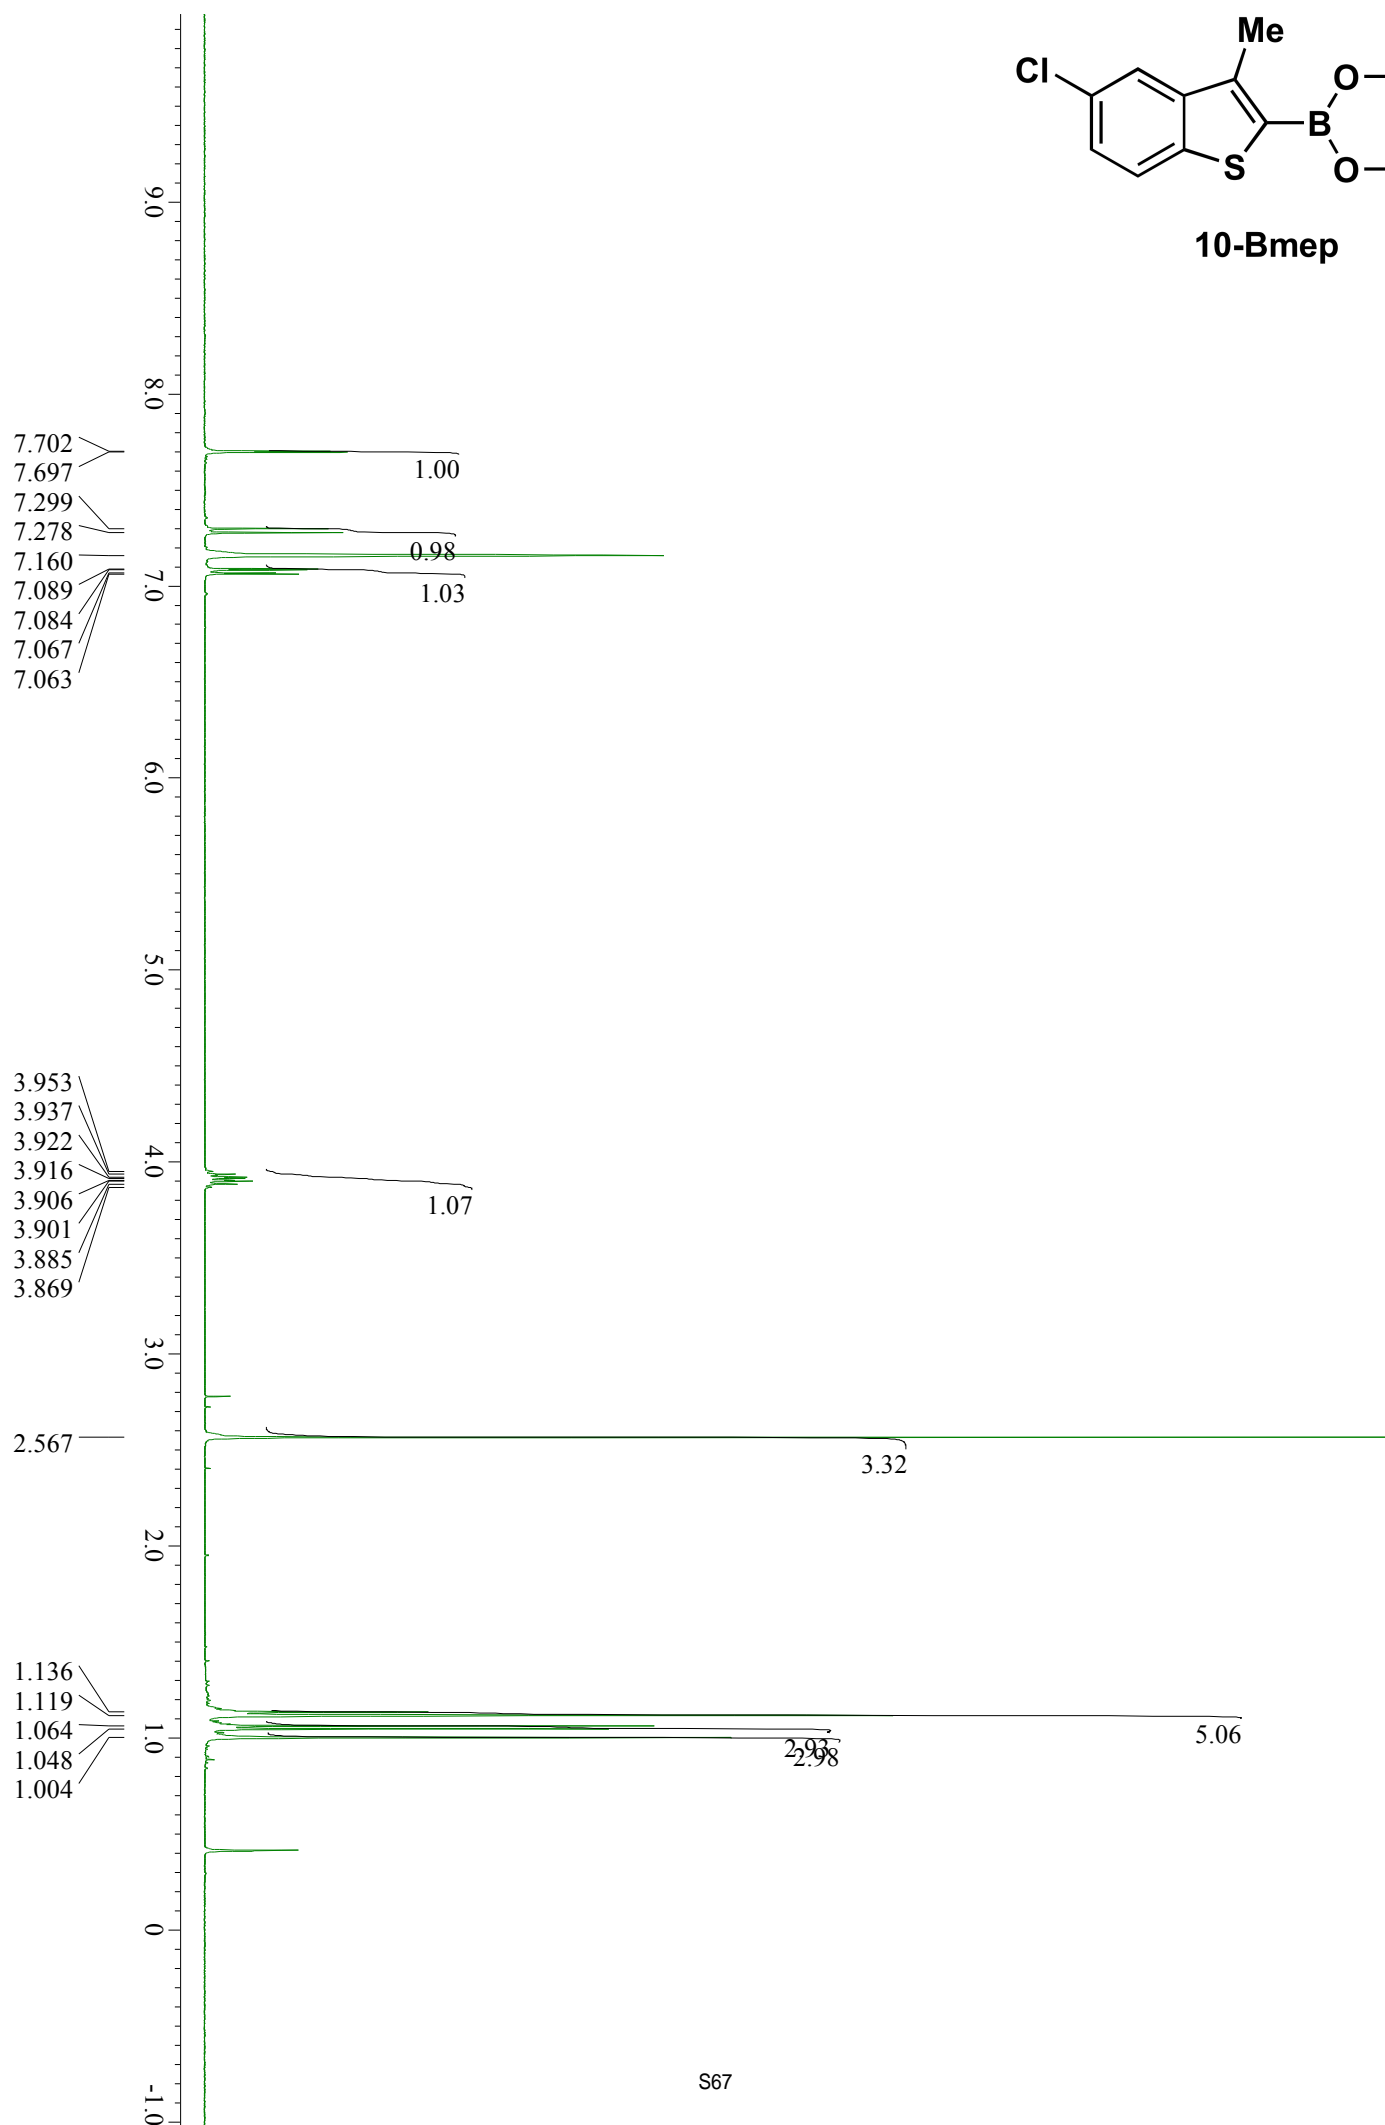

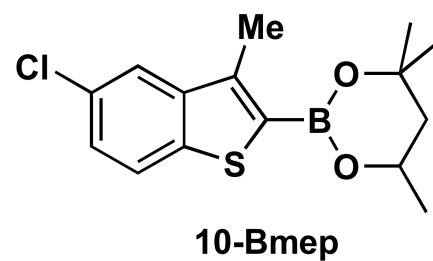

X : parts per Million : Carbon13

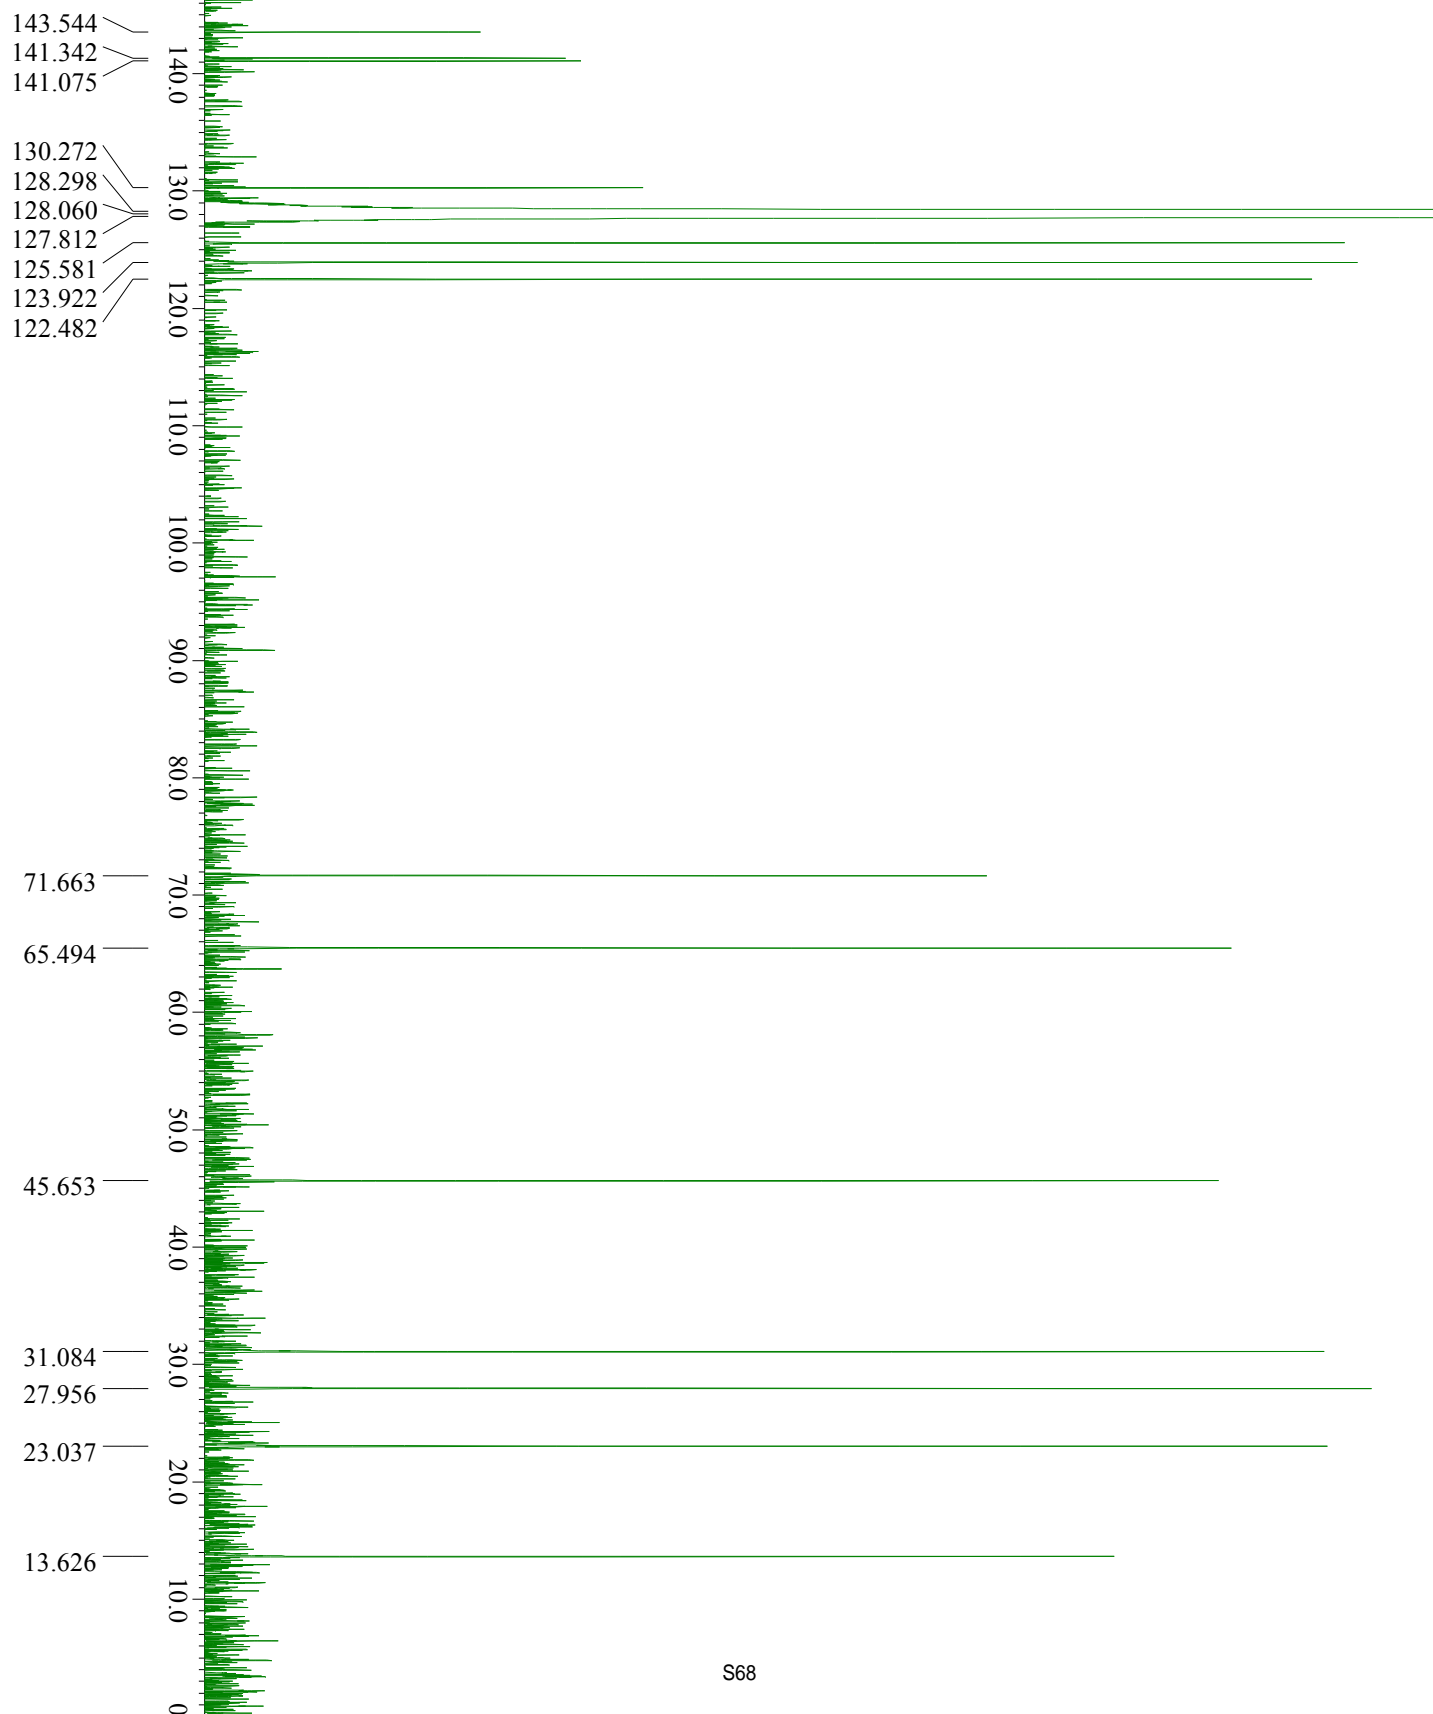

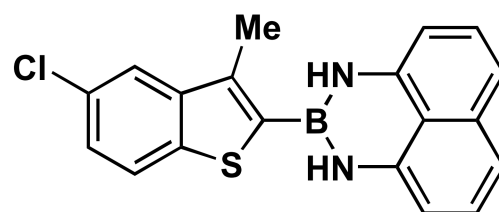

10-Bdan

X : parts per Million : Proton

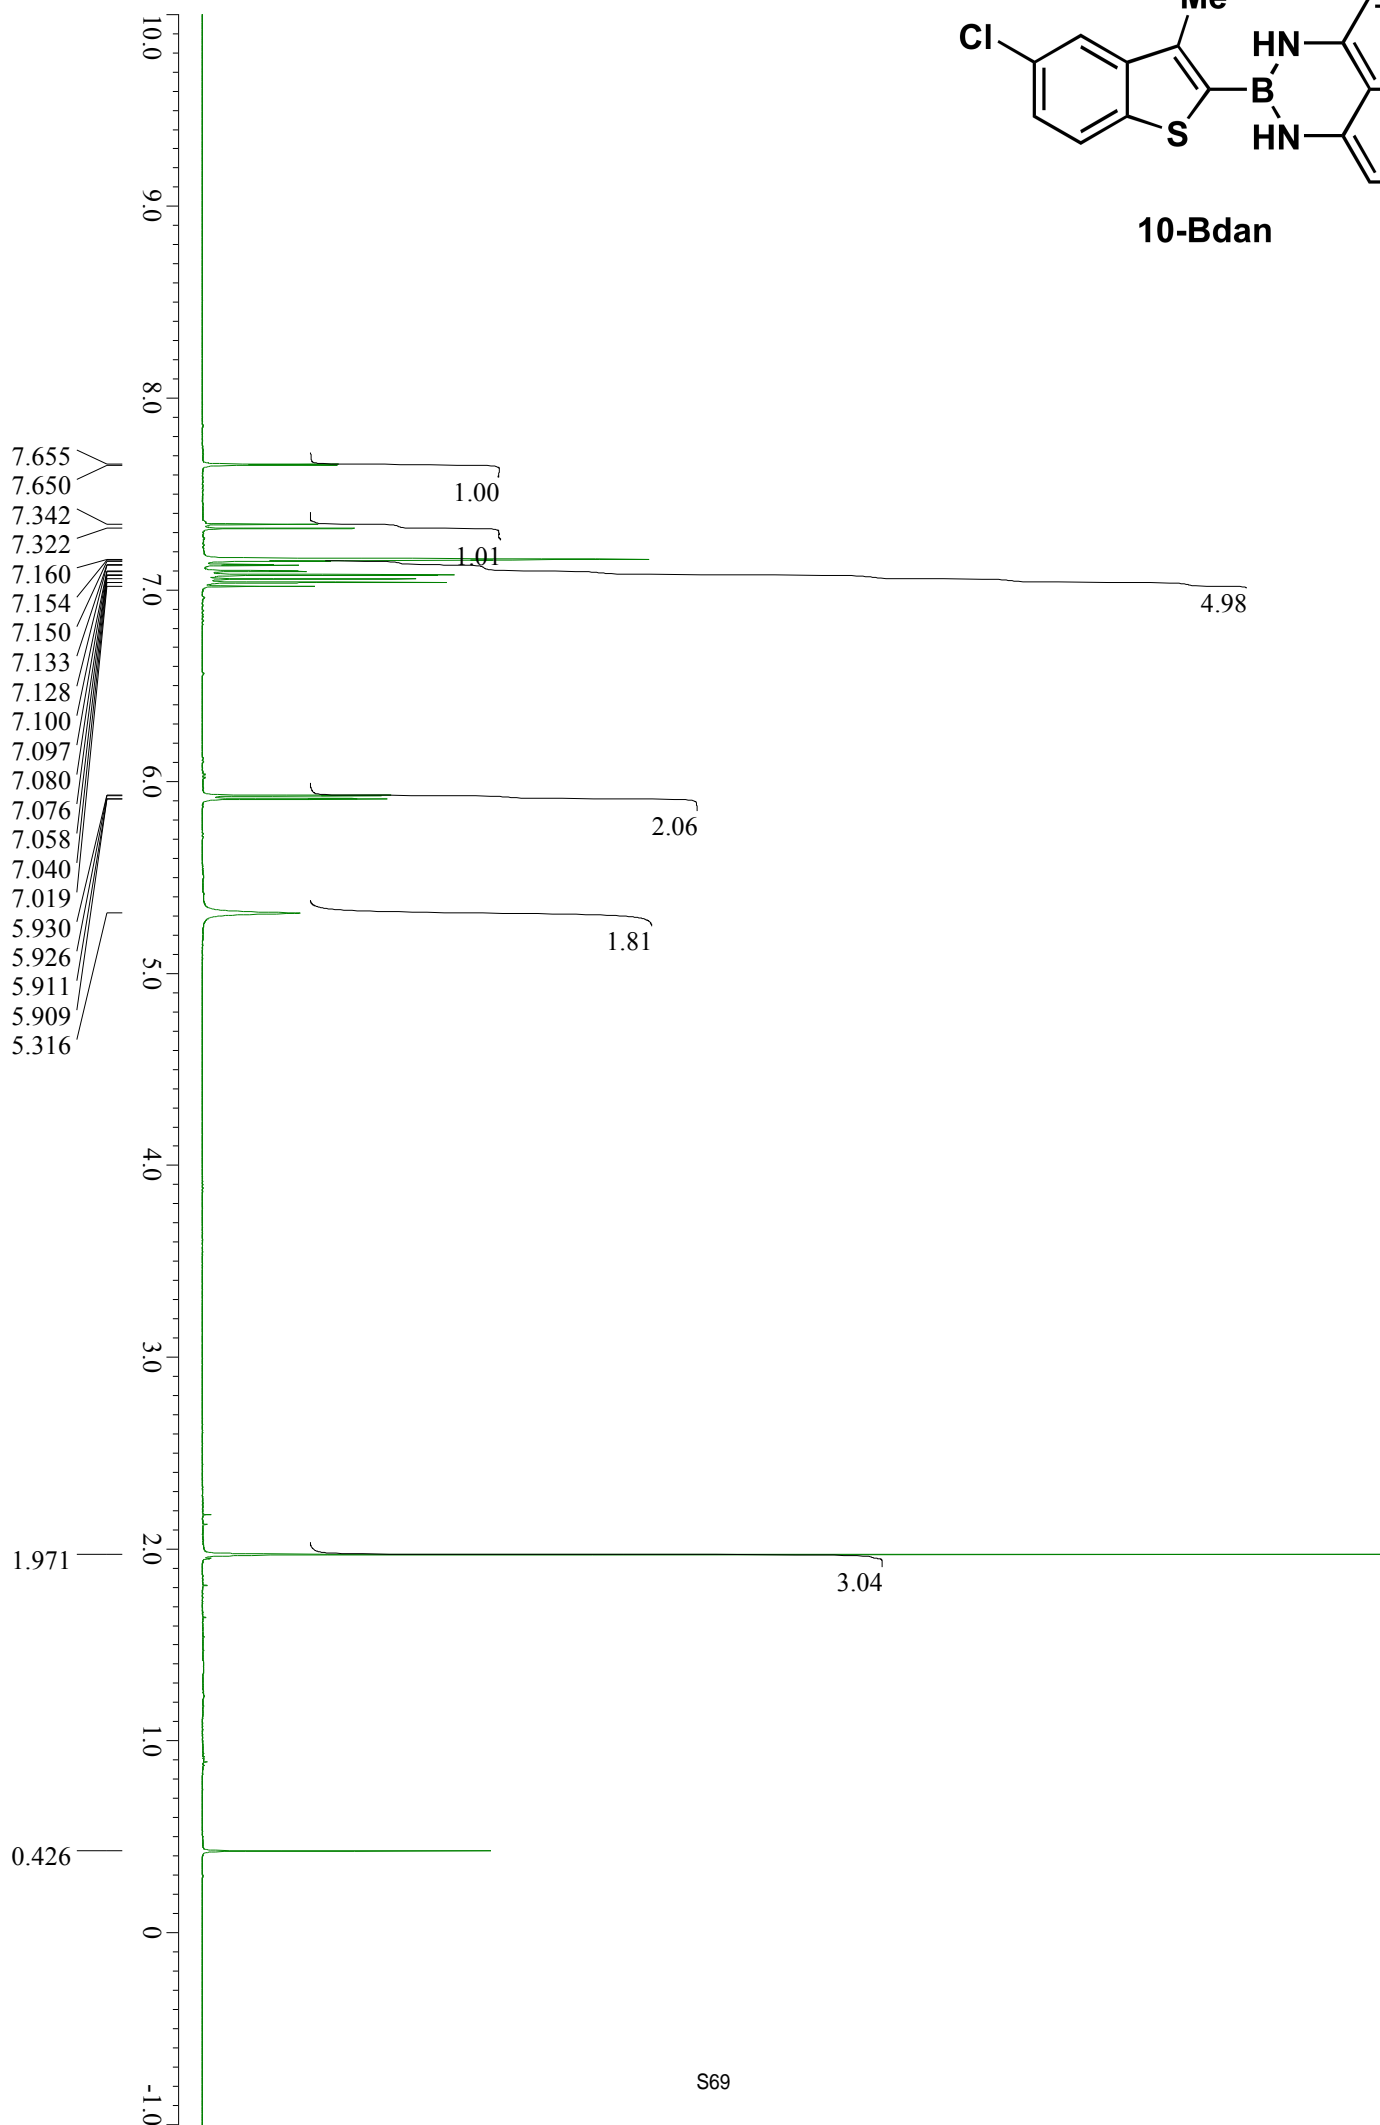

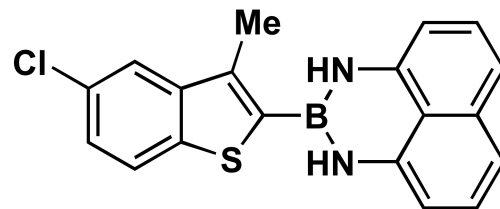

10-Bdan

X : parts per Million : Carbon13

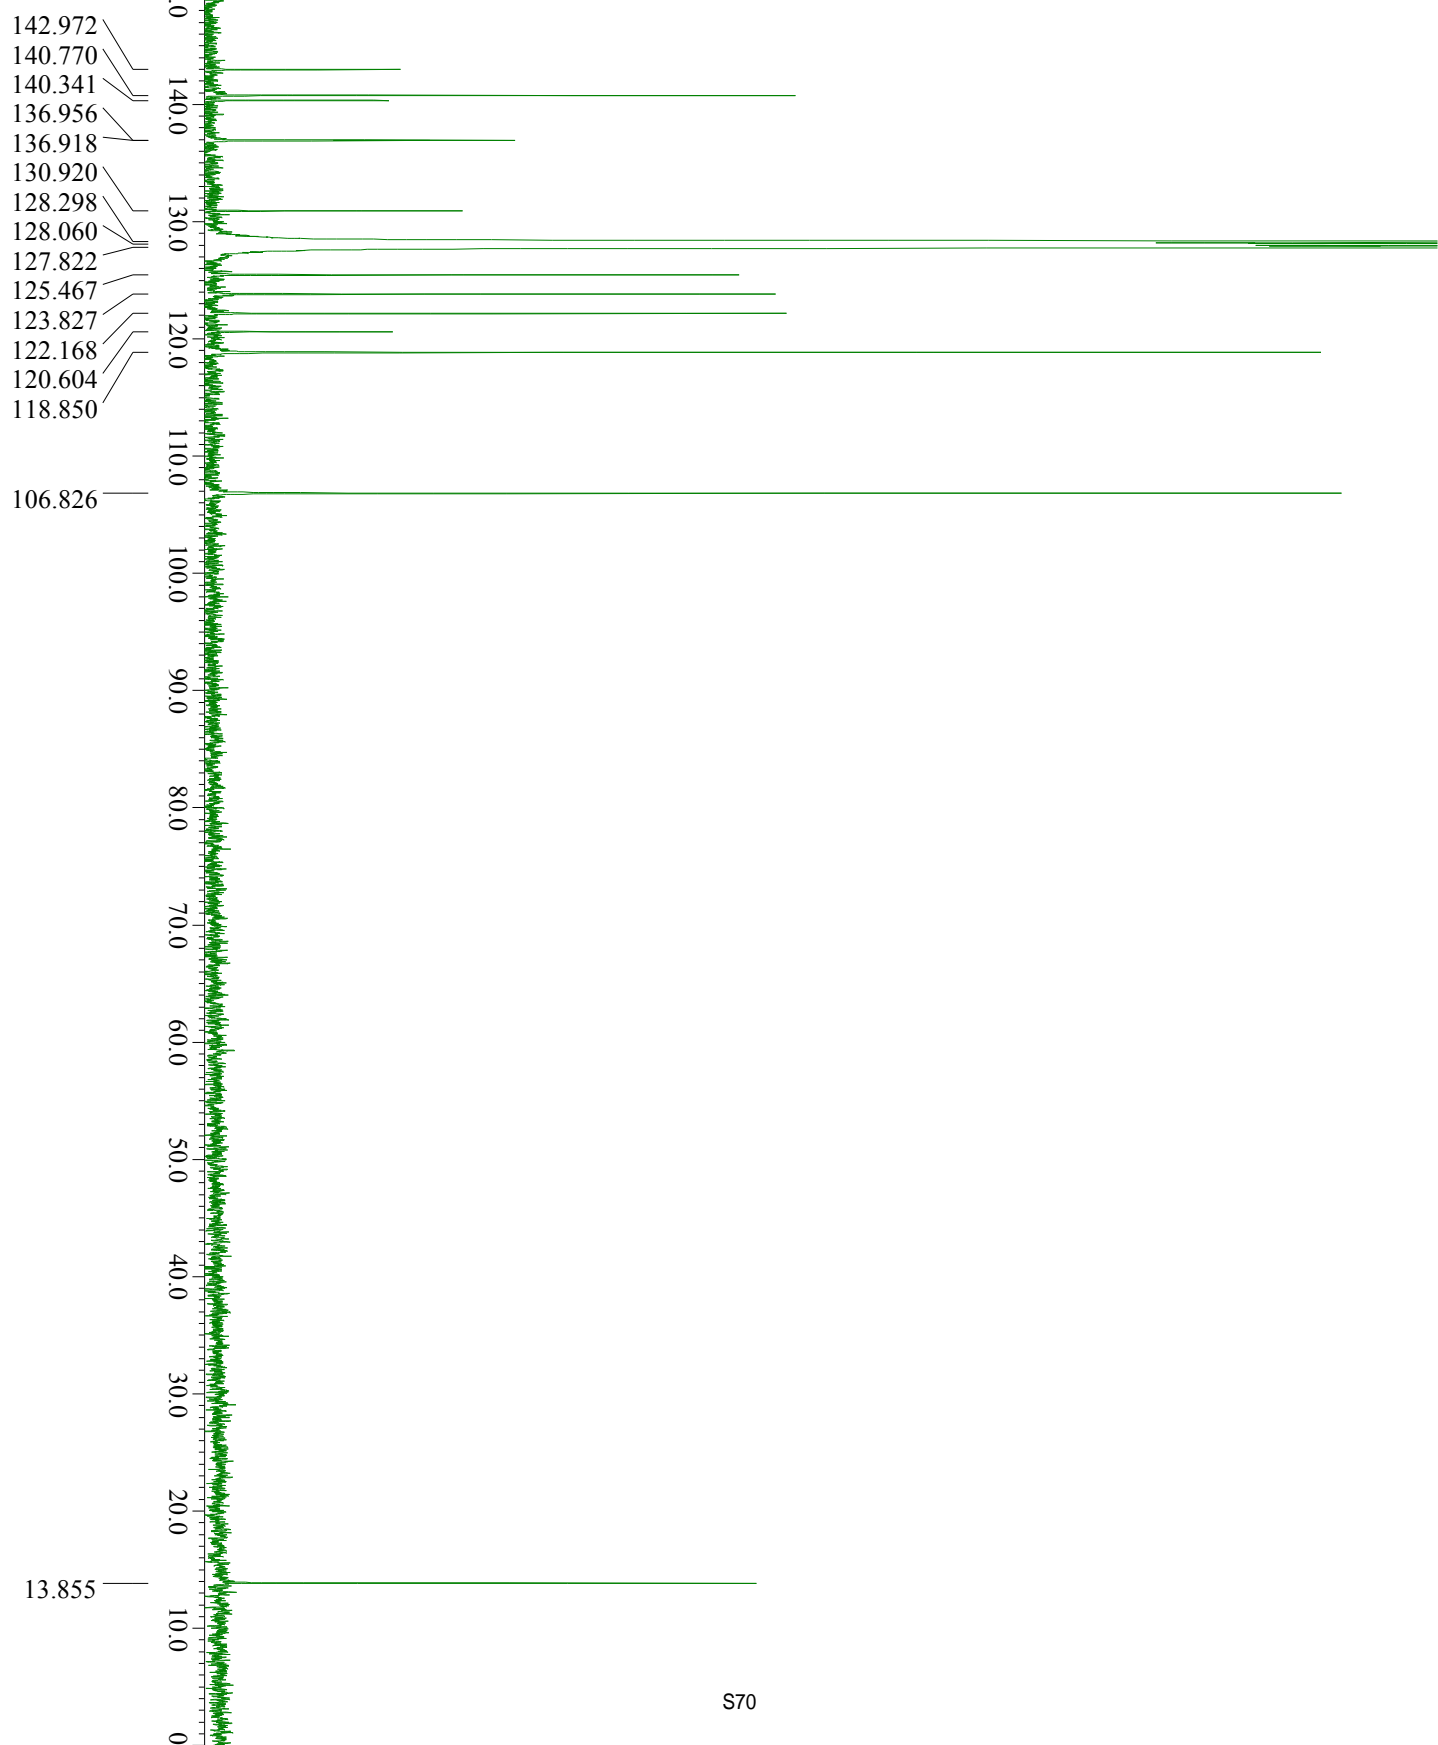

Supplement: Additional file 1 [file 1860-5397-12-65-S1.pdf]
